# Supplementary material for: Impact of red and processed meat and fibre intake on treatment outcomes among patients with chronic inflammatory diseases: protocol for a prospective cohort study of prognostic factors and personalised medicine
Source: PubMed Central journal article supplement — BMJ Open. 2018 Feb 8;8(2):e018166. doi: 10.1136/bmjopen-2017-018166 (PMC5829767; doi:10.1136/bmjopen-2017-018166), 2018-02-08
Supplement: bmjopen-2017-018166.draft_revisions.pdf [file bmjopen-2017-018166.draft_revisions.pdf]

# BMJ Open

BMJ Open is committed to open peer review. As part of this commitment we make the peer review history of every article we publish publicly available.

When an article is published we post the peer reviewers' comments and the authors' responses online. We also post the versions of the paper that were used during peer review. These are the versions that the peer review comments apply to.

The versions of the paper that follow are the versions that were submitted during the peer review process. They are not the versions of record or the final published versions. They should not be cited or distributed as the published version of this manuscript.

BMJ Open is an open access journal and the full, final, typeset and author-corrected version of record of the manuscript is available on our site with no access controls, subscription charges or pay-per-view fees (<http://bmjopen.bmj.com>).

If you have any questions on BMJ Open's open peer review process please email [editorial.bmjopen@bmj.com](mailto:editorial.bmjopen@bmj.com)

# BMJ Open

**Impact of red and processed meat and fibre intake on treatment outcome among patients with chronic inflammatory diseases:  
Protocol for a prospective cohort study on prognostic factors and personalised medicine**

|                               |                                                                                                                                                                                                                                                                                                                                                                                                                                                                                                                                                                                                                                                                                                                                                                                                                                                                                                                                                                                                                                                                                                                                                                                                                                                                                                                                                                                                                                                  |
|-------------------------------|--------------------------------------------------------------------------------------------------------------------------------------------------------------------------------------------------------------------------------------------------------------------------------------------------------------------------------------------------------------------------------------------------------------------------------------------------------------------------------------------------------------------------------------------------------------------------------------------------------------------------------------------------------------------------------------------------------------------------------------------------------------------------------------------------------------------------------------------------------------------------------------------------------------------------------------------------------------------------------------------------------------------------------------------------------------------------------------------------------------------------------------------------------------------------------------------------------------------------------------------------------------------------------------------------------------------------------------------------------------------------------------------------------------------------------------------------|
| Journal:                      | <i>BMJ Open</i>                                                                                                                                                                                                                                                                                                                                                                                                                                                                                                                                                                                                                                                                                                                                                                                                                                                                                                                                                                                                                                                                                                                                                                                                                                                                                                                                                                                                                                  |
| Manuscript ID                 | bmjopen-2017-018166                                                                                                                                                                                                                                                                                                                                                                                                                                                                                                                                                                                                                                                                                                                                                                                                                                                                                                                                                                                                                                                                                                                                                                                                                                                                                                                                                                                                                              |
| Article Type:                 | Protocol                                                                                                                                                                                                                                                                                                                                                                                                                                                                                                                                                                                                                                                                                                                                                                                                                                                                                                                                                                                                                                                                                                                                                                                                                                                                                                                                                                                                                                         |
| Date Submitted by the Author: | 09-Jun-2017                                                                                                                                                                                                                                                                                                                                                                                                                                                                                                                                                                                                                                                                                                                                                                                                                                                                                                                                                                                                                                                                                                                                                                                                                                                                                                                                                                                                                                      |
| Complete List of Authors:     | <p>Christensen, Robin; Frederiksberg and Bispebjerg Hospital, Parker Institute<br/>Heitmann, Berit; Institute of Preventive Medicine, Research Unit for dietary studies<br/>Andersen, Karina; Hospital of Southern Jutland, Focused research unit for<br/>Molecular Diagnostic and Clinical Research<br/>Nielsen, Ole<br/>Sørensen, Signe; Hospital of Southern Jutland, Focused research unit for<br/>Molecular Diagnostic and Clinical Research<br/>Jawhara, Mohamad; Hospital of Southern Jutland, Focused research unit<br/>for Molecular Diagnostic and Clinical Research<br/>Bygum, Anette<br/>Hvid, Lone<br/>Grauslund, Jakob; Odense University Hospital<br/>Wied, Jimmi; Odense University Hospital<br/>Glerup, Henning<br/>Fredberg, Ulrich<br/>Villadsen, Jan<br/>Kjær, Søren<br/>Fallingborg, Jan<br/>Moghadd, Seyed<br/>Knudsen, Torben<br/>Brodersen, Jacob<br/>Frøjk, Jesper<br/>Dahlerup, Jens; Aarhus University Hospital, Department of Hepatology and<br/>Gastroenterology<br/>Bojesen, Anders<br/>Sorensen, G; University of Southern Denmark<br/>Thiel, Steffen<br/>Færgeman, Nils<br/>Brandslund, Ivan; Sygehus Lillebalt, Department of Biochemistry<br/>stensball, allan<br/>Schmidt, Erik<br/>Franke, Andre; Christian-Albrechts University<br/>Ellinghaus, David<br/>Rosenstiel, Philip<br/>Raes, Jeroen; Katholieke Universiteit Leuven,<br/>Boye, Mette; Hospital of Southern Jutland, Focused research unit for</p> |

|                                        |                                                                                                                                                                                                                                                                                                                                                                                                                                                                                                                                           |
|----------------------------------------|-------------------------------------------------------------------------------------------------------------------------------------------------------------------------------------------------------------------------------------------------------------------------------------------------------------------------------------------------------------------------------------------------------------------------------------------------------------------------------------------------------------------------------------------|
|                                        | Molecular Diagnostic and Clinical Research<br>Werner, Lars<br>Lindgaard, Charlotte<br>Holmskov, Uffe; Syddansk Universitet Det Sundhedsvidenskabelige<br>Fakultet, institute og molecular medicine<br>Ellingsen, Torkell; Odense University Hospital, Rheumatology<br>Kjeldsen, Jens; Odense University Hospital<br>Andersen, Vibeke; Hospital of Southern Jutland, Focused research unit for<br>Molecular Diagnostic and Clinical Research; Syddansk Universitet Det<br>Sundhedsvidenskabelige Fakultet, institute og molecular medicine |
| <b>Primary Subject<br/>Heading</b> :   | Medical management                                                                                                                                                                                                                                                                                                                                                                                                                                                                                                                        |
| <b>Secondary Subject<br/>Heading</b> : | Nutrition and metabolism, Dermatology, Gastroenterology and hepatology,<br>Pharmacology and therapeutics, Rheumatology                                                                                                                                                                                                                                                                                                                                                                                                                    |
| <b>Keywords</b> :                      | lifestyle AND chronic inflammatory disease, biomarker AND lifestyle,<br>personalized medicine, patient related outcome measures, treatment<br>outcome, western style diet                                                                                                                                                                                                                                                                                                                                                                 |
|                                        |                                                                                                                                                                                                                                                                                                                                                                                                                                                                                                                                           |

SCHOLARONE™  
Manuscripts

review only

1 **Impact of red and processed meat and fibre intake on treatment**  
2 **outcome among patients with chronic inflammatory diseases:**  
3 *Protocol for a prospective cohort study on prognostic factors and*  
4 *personalised medicine*

5 Robin Christensen<sup>1</sup>, Berit Heitmann<sup>2,3,4</sup>, Karina W. Andersen<sup>1,5,6</sup>, Ole Haagen Nielsen<sup>7</sup>, Signe Bek  
6 Sørensen<sup>5</sup>, Mohamad Jawhara<sup>5,6</sup>, Anette Bygum<sup>8</sup>, Lone Hvid<sup>8</sup>, Jakob Grauslund<sup>9,10</sup>, Jimmi Wied<sup>9,10</sup>,  
7 Henning Glerup<sup>11</sup>, Ulrich Fredberg<sup>11,12</sup>, Jan Alexander Villadsen<sup>11</sup>, Søren Geill Kjær<sup>11</sup>, Jan  
8 Fallingborg<sup>13</sup>, Seyed A. G. R. Moghadd<sup>14</sup>, Torben Knudsen<sup>15</sup>, Jacob Brodersen<sup>15</sup>, Jesper Frøjk<sup>15</sup>, Jens F.  
9 Dahlerup<sup>16</sup>, Anders Bo Bojesen<sup>5</sup>, Grith Lykke Sorensen<sup>17</sup>, Steffen Thiel<sup>18</sup>, Nils J. Færgeman<sup>19</sup>, Ivan  
10 Brandslund<sup>120,21</sup>, Allan Stensballe<sup>22</sup>, Erik Berg Schmidt<sup>23</sup>, Andre Franke<sup>24</sup>, David Ellinghaus<sup>24</sup>, Philip  
11 Rosenstiel<sup>24</sup>, Jeroen Raes<sup>25,26</sup>, Mette Boye<sup>5</sup>, Lars Werner<sup>27</sup>, Charlotte Lindgaard Nielsen<sup>28</sup>, Uffe  
12 Holmskov<sup>17</sup>, Torkell Ellingsen<sup>11,12</sup>, Jens Kjeldsen<sup>29</sup>, Vibeke Andersen<sup>5,17,21,30</sup>

13 <sup>1</sup>Musculoskeletal Statistics Unit, the Parker Institute, Bispebjerg and Frederiksberg Hospital,  
14 Copenhagen F, Denmark

15 <sup>2</sup>Research Unit for Dietary Studies, the Parker Institute, Bispebjerg and Frederiksberg, Copenhagen F  
16 Denmark

17 <sup>3</sup>Section for General Medicine, Department of Public Health, University of Copenhagen, Denmark

18 <sup>4</sup>National Institute of Public Health, University of Southern Denmark, Denmark

19 <sup>5</sup>Focused research unit for Molecular Diagnostic and Clinical Research, IRS-Center Sonderjylland,  
20 Hospital of Southern Jutland, Aabenraa, Denmark

21 <sup>6</sup>Organcenter, Hospital of Southern Jutland, Denmark

- 1  
2  
3 22 <sup>7</sup>Department of Gastroenterology D112, Herlev Hospital, University of Copenhagen, Herlev,  
4  
5 23 Denmark  
6  
7  
8 24 <sup>8</sup>Department of Dermatology and Allergy Centre, Odense University Hospital, Odense, Denmark  
9  
10 25 <sup>9</sup>Department of Clinical Research, University of Southern Denmark, Odense, Denmark  
11  
12  
13 26 <sup>10</sup>Department of Ophthalmology, Odense University Hospital, Odense, Denmark  
14  
15  
16 27 <sup>11</sup>Diagnostic Centre, Silkeborg Regional Hospital, Silkeborg, Denmark  
17  
18  
19 28 <sup>12</sup>Department of Rheumatology, Odense University Hospital, Odense, Denmark  
20  
21 29 <sup>13</sup>Department of Gastroenterology and Hepatology, Aalborg University Hospital, Aalborg  
22  
23  
24 30 <sup>14</sup>Department of Internal Medicine, Herning Regional Hospital, Herning, Denmark  
25  
26  
27 31 <sup>15</sup>Department of Gastroenterology, Hospital of South West Jutland, Esbjerg, Denmark  
28  
29 32 <sup>16</sup>Department of Hepatology and Gastroenterology, Aarhus University Hospital, Aarhus, Denmark  
30  
31  
32 33 <sup>17</sup>Institute of Molecular Medicine, University of Southern Denmark, Odense, Denmark  
33  
34  
35 34 <sup>18</sup>Department of Biomedicine, Aarhus University, Aarhus, Denmark  
36  
37 35 <sup>19</sup>Department of Biochemistry and Molecular Biology, Villum Center for Bioanalytical Sciences,  
38  
39 36 University of Southern Denmark, Odense, Denmark  
40  
41  
42 37 <sup>20</sup>Department of Clinical Biochemistry, Lillebælt Hospital, Vejle, Denmark  
43  
44  
45 38 <sup>21</sup>Institute of Regional Health Research, University of Southern Denmark, Odense, Denmark  
46  
47 39 <sup>22</sup>Department of Health Science and Technology, Aalborg University, Denmark  
48  
49  
50 40 <sup>23</sup>Department of Cardiology, Aalborg University Hospital, Aalborg, Denmark  
51  
52  
53 41 <sup>24</sup>Institute of Clinical Molecular Biology, Christian-Albrechts-University of Kiel, Kiel, Germany  
54  
55  
56 42 <sup>25</sup>Department of Microbiology and Immunology, KU Leuven-University of Leuven, Leuven,  
57  
58 43 Belgium  
59  
60

1  
2  
3 44 <sup>26</sup>VIB, Center for the Biology of Disease, Leuven, Belgium

4  
5 45 <sup>27</sup>The Danish Psoriasis Association, Tåstrup, Denmark

6  
7  
8 46 <sup>28</sup>The Danish Colitis-Crohn Association, Odense, Denmark

9  
10 47 <sup>29</sup>Department of Gastroenterology, Odense University Hospital, Odense, Denmark

11  
12 48 <sup>30</sup>OPEN, University of Southern Denmark, Odense, Denmark

13  
14  
15  
16 49 **Correspondence:**

17  
18 50 Vibeke Andersen, Focused research unit for Molecular Diagnostic and Clinical Research, IRS-Center

19  
20 51 Sønderjylland "Forskningshuset", Hospital of Southern Jutland, Kresten Philipsens Vej 15 F, 6200

21  
22 52 Aabenraa, Denmark, email: vandensen@health.sdu.dk

23  
24  
25  
26 53

27  
28 54

55 **ABSTRACT**

56 **Introduction:** Chronic inflammatory diseases (CID) - including inflammatory bowel  
57 diseases (Crohn's disease and ulcerative colitis), rheumatic conditions (rheumatoid  
58 arthritis, axial spondyloarthritis, psoriatic arthritis), inflammatory skin diseases (psoriasis,  
59 hidradenitis suppurativa) and non-infectious uveitis are treated with biologics targeting  
60 the pro-inflammatory molecule tumour necrosis factor (TNF)- $\alpha$  inhibitors (i.e. referred to  
61 as TNFi). Up to one third of the patients do, however, not respond to biologics and  
62 lifestyle factors are assumed to affect the treatment outcome. However, little is known on  
63 the effects of dietary lifestyle as a prognostic factor (possibly enabling personalised  
64 medicine). The overall aim of this multidisciplinary collaborative study is to identify  
65 dietary lifestyle factors that could support individualised forecasting of optimised  
66 treatment outcome.

67 **Methods and analysis:** This prospective cohort study will enrol CID patients assigned for  
68 TNFi. At baseline (Pre-treatment), patient characteristics are assessed using  
69 patient-reported outcome measures, clinical assessments on disease activity, quality of  
70 life, and lifestyle together with registry data on comorbidity as well as concomitant  
71 medication. Follow-up will be conducted at week 14-16 after treatment initiation  
72 (according to the current Danish standards). Evaluation of a successful treatment outcome  
73 response will - for each disease - be based on established primary and secondary  
74 endpoints (including disease-specific core outcome sets); the major outcome of the  
75 analyses will be to detect differences in treatment outcome between patients with specific  
76 lifestyle characteristics.

1  
2  
3 77 **Ethics and dissemination:** The overarching goal of this project is to improve the lives of  
4  
5 78 patients suffering from CID, by providing evidence to support dietary recommendations  
6  
7  
8 79 likely to improve the clinical outcome. The study is approved by the local Ethics  
9  
10 80 Committee (S-20160124) and the local Data Agency (2008-58-035). The study findings will  
11  
12 81 be disseminated in peer-reviewed journals, via patient associations, and presented at  
13  
14 82 national and international conferences.

15  
16  
17  
18 83 **Trial Registration details:** ClinicalTrials.gov identifier: NCT03173144

19  
20  
21  
22 84 Keywords: biomarker; lifestyle; personalized medicine; patient related outcome measures  
23  
24 85 (PROMs); treatment outcome; western style diet (WSD)  
25  
26

#### Strengths and limitations of this study

- This study includes a number of diseases that are treated with drugs targeting the pro-inflammatory cytokine tumour necrosis factor- $\alpha$
- All evaluations are performed as part of a prospectively designed cohort study by established disease-specific scoring systems
- As comparison across diseases is limited by disease-specific scoring systems additional response criteria (e.g. quality of life and disability) are also used for analyses

27  
28  
29  
30  
31  
32  
33  
34  
35  
36  
37  
38  
39  
40  
41  
42  
43  
44  
45  
46  
47  
48  
49  
50  
51 86

52  
53  
54 87  
55  
56  
57  
58  
59  
60



## 88 INTRODUCTION

89 Chronic inflammatory diseases (CID), including inflammatory bowel diseases (IBD) (of  
90 which Crohn's disease [CD] and ulcerative colitis [UC] are the two most common entities),  
91 rheumatic conditions (rheumatoid arthritis [RA], axial spondyloarthritis [axSpA],  
92 psoriatic arthritis [PsA]), skin diseases (psoriasis [PsO], hidradenitis suppurativa [HS]), and  
93 eye disease (non-infectious uveitis [NiU]), are diseases of the immune system that are  
94 managed with biological agents targeting (by inhibiting) the pro-inflammatory cytokine  
95 TNF (i.e. TNFi).

96 CIDs have a large and negative impact on the individual patient as well as the society  
97 (diminished work capacity as well as health expenses for therapies). CIDs are recurring,  
98 lifelong illnesses of potentially early onset that substantially affect the life quality of the  
99 patients and their families<sup>1-4</sup>. In addition, they are rather frequent; IBD affects up to 0.5 % of  
100 the population in the Western world<sup>5</sup> and RA and PsO have global prevalences of 0.3-1.0%  
101 and 1.5%, respectively<sup>6,7</sup>. Furthermore, the disease burden is predicted to rise dramatically  
102 due to growth in population, increasing aging, and increasing disease incidence<sup>8-10</sup>.  
103 Therefore, in the future, a large and increasing challenge will be put on the health care  
104 system, as more patients will need treatment. The diseases may have overlapping  
105 symptoms<sup>11</sup>. For example, some patients with UV and AS may experience bowel  
106 symptoms, and some patients with IBD may develop eye, joint and skin symptoms. The  
107 diseases are rather complex diseases with both genetic and environmental factors involved  
108 in the disease development. Hence, the CIDs share some genetic and environmental  
109 predisposing factors whereas other susceptibility factors differ between the diseases<sup>12</sup>. The  
110 genetic architecture of CIDs has previously been investigated by large international  
111 consortia<sup>13-19</sup>. Further, environmental factors have been investigated in large cohorts with

1  
2  
3 112 prospectively collected lifestyle data, such as European Investigation into Cancer and  
4  
5 113 Nutrition (EPIC) Study and the Nurses' Health Study (NHS)<sup>20-34</sup>.

6  
7  
8 114 In light of the large impact from the environment on the disease development mirrored  
9  
10 115 by the increasing incidence<sup>5 10</sup>, it seems that the environment, including lifestyle, may  
11  
12 116 influence treatment response. Accordingly, many patients ask their health care  
13  
14 117 professionals about lifestyle recommendations that can improve the outcome of TNFi.  
15  
16

17  
18 118

### 19 119 **Evidence-Based Research**

20  
21  
22  
23 120 In an attempt to increase value and reduce waste in research, no new studies should be  
24  
25 121 done without a systematic review of existing evidence<sup>35</sup>. In a recent systematic review  
26  
27 122 investigating the current knowledge on the impact of diet on TNFi response in IBD<sup>36</sup>, it was  
28  
29 123 concluded that an evidence-based dialogue on the impact of diet on TNFi treatment  
30  
31 124 response for clinical use is scarce. Similarly, to the best of our knowledge, only few large  
32  
33 125 prospective studies have assessed effects of lifestyle on anti-TNF treated CID patients <sup>37</sup>.  
34  
35  
36 126 One prospective study compared partial enteral nutrition (16 patients), exclusive enteral  
37  
38 127 nutrition (22 patients), and anti-TNF (52 patients) therapy in 90 paediatric patients. There  
39  
40 128 were no significant differences in clinical response rates between the three treatments;  
41  
42 129 however, the rate of patients that achieved a faecal calprotectin  $\leq 250$   $\mu\text{g/g}$  was higher  
43  
44 130 among the anti-TNF treated patients than the other treatment arms<sup>38</sup>.  
45  
46

47  
48  
49 131 More recently, potential lifestyle factors for further investigation in relation to TNFi  
50  
51 132 therapy among CID patients were identified<sup>39</sup>. In order to explore different hypotheses, we  
52  
53 133 included studies that may be subject to recall bias, and bias introduced by lifestyle changes  
54  
55 134 due to the disease itself; among identified factors were smoking, physical activities, and  
56  
57  
58  
59  
60

1  
2  
3 135 intake of Western style diet<sup>39</sup>. In fact, we have proposed a model whereby a diet high in  
4  
5 136 meat and low in fibres may impact inflammation and anti-TNF treatment<sup>36</sup> (Figure 1).  
6  
7

8 137 Following the previous evidence provided, we set out to prospectively identify  
9  
10 138 lifestyle factors that support achievement of optimal treatment outcome. The ultimate aim  
11  
12 139 is to improve the quality of life of the individual CID patient by providing feasible advice  
13  
14 140 such as dietary recommendations for improved treatment outcome.  
15  
16  
17  
18  
19 141

## 20 21 22 142 **Aims and hypotheses** 23

24  
25 143 The primary aim of this prospective cohort study is to investigate whether treatment  
26  
27 144 outcomes across conditions differ between various predefined lifestyle factors. The main  
28  
29 145 hypothesis is that '*Diets high in fibre AND low in red and processed meat are associated with an*  
30  
31 146 *improved treatment outcome*'. Secondary aims are to investigate whether and to what extent  
32  
33 147 lifestyle-associated biomarkers have prognostic value for differentiating responders from  
34  
35 148 non-responders based on both disease-specific and generic treatment outcomes.  
36  
37  
38  
39  
40 149

1  
2  
3 150 **METHODS AND ANALYSIS**  
4  
5

6 151 **Design**  
7  
8

9  
10 152 The BELIEVE study is a prospective cohort study with focus on disease activity after (14-16  
11  
12 153 weeks) of initiating TNFi. The primary endpoint will be assessed at week 14-16 after  
13  
14 154 initiation of TNFi, and is defined based on specific CID condition; where a A: Responder  
15  
16 155 according to the specific criteria described below (incl. drug-continuation) or B:  
17  
18 156 Non-responder (incl. drug-discontinuation). Whether a patient will discontinue therapy is  
19  
20 157 assumed to be based on a certain degree of shared decision making between the patient  
21  
22 158 and physician supported by principles from national guidelines for each CID as  
23  
24 159 recommended in the respective national guidelines <sup>40</sup> and laboratory data.  
25  
26  
27  
28  
29

30 160  
31

32  
33 161 **Setting**  
34  
35

36 162 The study took place at the 1) Department of Gastroenterology and Hepatology, Aalborg  
37  
38 163 University Hospital; 2) Department of Hepatology and Gastroenterology, Aarhus  
39  
40 164 University Hospital; 3) Diagnostic Centre, Silkeborg Regional Hospital; 4) Department of  
41  
42 165 Internal Medicine, Herning Regional Hospital; 5) Department of Gastroenterology, Herlev  
43  
44 166 Hospital; 6) Organ Centre, Hospital of Southern Jutland; 7) Department of  
45  
46 167 Gastroenterology Hospital of South West Jutland; 8) Department of Medical  
47  
48 168 Gastroenterology, Department of Rheumatology, Department of Dermatology and Allergy  
49  
50 169 Centre, and Department of Ophthalmology, Odense University Hospital will be included  
51  
52 170 from 1<sup>st</sup> of April 2017 and until 31<sup>th</sup> of Marts 2019 or until a minimum of 100 patients with  
53  
54  
55  
56  
57  
58  
59  
60

171 IBD, 100 patients with RA, and 120 patients with axSpA, PsA, PsO, HS and NiU are

172 achieved.

173

#### 174 **Patient characteristics and eligibility criteria**

175 Inclusion criteria: patients  $\geq 18$  years with CID assigned for initiation of TNFi therapy for

176 the first time and able to read and understand Danish. Exclusion criteria: patients that

177 previously have received biological treatment and patients not mentally able to answer the

178 questionnaire.

179 Clinical data (Table 1) consist of personal data, data on health and disease, lifestyle,

180 laboratory measurements, and disease activity scores including patient-reported outcome

181 measures (PROMs), clinical assessments, and laboratory data. Each participant will fill out

182 validated questionnaires on disease activity, quality of life, and lifestyle using an electronic

183 link. Studies have revealed electronic questionnaires to be comparable to paper-based in

184 relation to the outcomes (i.e. PROMs)<sup>41 42</sup>.

185

#### 186 **Primary and secondary endpoints**

187 *Primary endpoint:* The predefined primary endpoint will be the proportion of patients with

188 clinical response to therapy at first clinical followup (i.e. week 14-16 according to Danish

189 standard):

190 • Crohn's disease: clinical remission, defined as Harvey and Bradshaw Index (HBI) of

191 4 or less<sup>43</sup>

- 1  
2  
3 192 • Ulcerative colitis: clinical remission, defined as Mayo Clinic Score of 2 or less (with  
4  
5 193 no individual subscore of >1)<sup>44</sup>  
6  
7  
8  
9 194 • Rheumatoid arthritis: clinical response, defined as at least 20% improvement  
10  
11 195 according to the criteria of the American College of Rheumatology (ACR20)<sup>45</sup>  
12  
13  
14 196 • Axial spondyloarthritis: clinical response, defined as at least 20% improvement in  
15  
16 197 Assessment of Spondyloarthritis International Society (ASAS20)<sup>46 47</sup>  
18  
19  
20 198 • Psoriatic arthritis: clinical response, defined as at least 20% improvement according  
21  
22 199 to the criteria of the American College of Rheumatology (ACR20)<sup>48</sup>  
23  
24  
25  
26 200 • Psoriasis: clinical response, defined as at least 75% improvement in Psoriasis Area  
27  
28 201 and Severity Index (PASI 75)<sup>49</sup>  
29  
30  
31  
32 202 • Hidradenitis suppurativa: clinical response, defined as at least a 50% reduction in  
33  
34 203 the abscess and inflammatory-nodule count, with no increase in abscess or  
35  
36 204 draining-fistula counts (HiSCR response)<sup>50</sup>  
37  
38  
39  
40 205 • Non-Infectious Uveitis: clinical response, defined as those who did not have a  
41  
42 206 treatment failure (treatment failure will be based on assessment of new  
43  
44 207 inflammatory lesions, best corrected visual acuity, anterior chamber cell grade, and  
45  
46 208 vitreous haze grade)<sup>51</sup>  
47  
48  
49  
50  
51 209 *Key secondary outcomes:* Major secondary outcomes include, where available disease-specific  
52  
53 210 outcome measures, covering core outcome sets as well as generic health-related quality of  
54  
55 211 life (HRQoL) and disability at endpoint (first clinical followup; i.e., week 14-16 according to  
56  
57 212 Danish standard):  
58  
59  
60

1  
2  
3  
4 213 Crohn's disease: STRIDE (Abdominal pain, Diarrhoea, Altered bowel habit,  
5  
6 214 SES-CD [Presence of ulcers, Ulcerated Surface, Affected surface, Presence of  
7  
8  
9 215 narrowings, Number of affected segments], Alterations of cross-sectional imaging  
10  
11 216 [MR, CT, UL][Only when endoscopy cannot adequately evaluate inflammation]),  
12  
13  
14 217 HBI (General well-being, Abdominal pain, Number of liquid stools per day,  
15  
16  
17 218 Abdominal Mass, Extraintestinal Manifestations [Abscess, fistulas, fissures,  
18  
19 219 arthralgia, uveitis, erythema nodosum, pyoderma gangrenosum, mouth ulcera]),  
20  
21  
22 220 Physician global assessment, Number of draining fistulas, Corticosteroid-Free  
23  
24  
25 221 Remission, Concomitant medication  
26  
27  
28 222 Ulcerative Colitis: STRIDE (Rectal bleeding, Altered bowel habit, Endoscopic  
29  
30  
31 223 remission [Mayo endoscopic subscore of 0-1]), Mayo Clinical Score (Mayo  
32  
33 224 endoscopic subscore, Stools, Rectal bleeding, Physicians global assessment), Mayo  
34  
35  
36 225 "normal mucosal appearance", Mayo clinical response, SCCAI (Bowel frequency  
37  
38 226 [day], Bowel frequency [night], Urgency of defecation, Blood in Stool, General  
39  
40  
41 227 well-being, Extracolonic features), Physician global assessment, Corticosteroid-Free  
42  
43  
44 228 Remission, Concomitant medication  
45  
46  
47 229 Rheumatoid Arthritis: Tender joints, Swollen joints, Pain, Physician global  
48  
49  
50 230 assessment, Patient global assessment, HAQ-DI, C-Reactive protein, DAS28-CRP,  
51  
52  
53 231 Simplified Disease Activity Index (SDAI)  
54  
55  
56 232 Axial Spondyloarthritis: BASFI, BASDAI, BASMI, Total score for back pain,  
57  
58  
59 233 Physician global assessment, Patient global assessment, C-Reactive protein  
60

1  
2  
3  
4 234 Psoriatic Arthritis: Tender joints, Swollen joints, Psoriatic Arthritis Pain, Physician  
5  
6 235 global assessment, Patient global assessment, HAQ-DI, C-Reactive protein,  
7  
8  
9 236 DAS28-CRP, Simplified Disease Activity Index (SDAI), PASI  
10  
11  
12 237 Psoriasis: PASI, Physician global assessment, Patient global assessment, Psoriatic  
13  
14 238 Arthritis Pain, Dermatology Life Quality Index (DLQI) Total Score.  
15  
16  
17  
18 239 Hidradenitis Suppurativa: Percentage of Participants who achieve Abscess and  
19  
20 240 Inflammatory Nodule (AN) Count of 0, 1, and 2, respectively, Patient's Global  
21  
22 241 Assessment of Skin Pain, Modified Sartorius Score  
23  
24  
25  
26  
27 242 Non-Infectious Uveitis: New active, inflammatory chorioretinal or retinal vascular  
28  
29 243 lesions relative to Baseline, Inability to achieve  $\leq 0.5+$  or a 2-step increase relative to  
30  
31 244 best state achieved at all visits in anterior chamber cell grade or vitreous haze  
32  
33 245 grade, Worsening of best corrected visual acuity by  $\geq 15$  letters relative to best state  
34  
35 246 achieved.  
36  
37  
38  
39  
40 247 *Exploratory secondary (tertiary) outcomes:* As exploratory outcomes we will use biological  
41  
42 248 measures, disease specific disease activity measures as individual measure and combined  
43  
44 249 in scores as well as changes of these (including those measured by physician/patients such  
45  
46 250 as patients' health related quality of life) at first clinical followup<sup>52</sup> (week 14-16) (Table 1).  
47  
48 251 Furthermore, change in use of concomitant medicine, steroid-free remission, serious  
49  
50 252 adverse events (e.g. hospitalisations), and surgery at first clinical followup<sup>52</sup> (week 14-16)  
51  
52 253 will be used (Table 1).  
53  
54  
55  
56  
57  
58 254  
59  
60



1  
2  
3 255 **Prognostic factors**  
4  
5

6 256 *Primary exposure variable:* For the primary prognostic model, the primary exposure variables  
7  
8  
9 257 will be in prioritized order:

- 10  
11  
12 258 • Upper tertile (33.3% of the total sample) based on the ratio of fibre/meat intake is  
13 associated with better treatment outcome  
14  
15 259  
16  
17 260 • Low intake of red and processed meat (defined as below the lower tertile [33.3% of  
18 the total sample]) and high intake of dietary fibres (defined as those above the  
19  
20 261 the total sample]) are independently associated with better  
21  
22 262 upper tertile [33.3% of the total sample]) are independently associated with better  
23  
24 263 treatment outcome, and a potential interaction between them gives the best  
25  
26 264 treatment outcome.  
27  
28  
29

30  
31 265 *Other (exploratory) exposure variables:*  
32  
33

- 34  
35 266 • Lifestyle factors independently or combined (red and processed meat, vegetables,  
36  
37 267 dietary fibre, cereals, gluten, legumes, red wine, dairy products, physical activity,  
38  
39 268 smoking, total protein/ fat, protein/ fat from red and processed meat, glyceimic  
40  
41 269 index)  
42  
43  
44 270 • Pretreatment lifestyle-associated biomarkers  
45  
46 271 • Combinations of lifestyle factors and lifestyle-associated biomarkers  
47  
48 272 • Gene-environment interaction analyses  
49  
50 273 • Pretreatment levels of inflammatory molecules  
51  
52  
53  
54  
55  
56 274  
57  
58

59 275 **Data management**  
60

1  
2  
3 276 The electronic questionnaire is in Danish language and the participants will have access to  
4  
5 277 the questionnaire by an electronic link sent to their personal, electronic mailbox. All data  
6  
7  
8 278 will be stored in a secure research storage facility<sup>53</sup>. Information registered by clinicians and  
9  
10 279 technicians will occasionally be transferred from paper format to electronic format using  
11  
12  
13 280 either double entry of data or automated forms processing<sup>54</sup>.

14  
15  
16 281 No important risk for the participating patients is foreseen as a direct result of the  
17  
18  
19 282 project. The clinicians will handle the healthcare of included patients as normal. As a result  
20  
21  
22 283 of this, no Data Management Committee will be established.  
23

24  
25 284

## 26 27 28 285 **Statistical methods**

29  
30  
31 286 Prognostic factor research is developed to aid health care providers in estimating the  
32  
33  
34 287 probability or risk that a specific event will occur in the future (prognostic models), and  
35  
36  
37 288 should subsequently be able to inform decision making<sup>55</sup>. Conceptually, we define a good  
38  
39  
40 289 prognostic model as one that works satisfactorily (i.e. is truthful) for patients other than  
41  
42  
43 290 those from whose data it was derived<sup>56</sup>. We will use this rigorously designed, prospective  
44  
45  
46 291 cohort study to explore our ability to predict clinical response across the conditions  
47  
48  
49 292 included (Y=primary endpoint), and explore whether patients who are on a diet high in  
50  
51  
52 293 fibre AND low in red and processed meat (X=assessed at baseline) is an informative  
53  
54  
55 294 prognostic factor. Per default, the statistical models will include condition (any of the CID  
56  
57  
58 295 conditions included), and clinical centre (site #1 to #8) as fixed effects. Specific details will  
59  
60 296 be part of the final Statistical Analysis Plan (SAP). In terms of transparency, we will follow

1  
2  
3  
4 297 the guidance from the 'Transparent Reporting of a multivariable prediction model for Individual  
5  
6 298 Prognosis Or Diagnosis' (TRIPOD) for the reporting of the multivariable models<sup>57</sup>.

7  
8  
9 299 *Sample size considerations:* It is a well-known difficulty for exploratory prognostic factor  
10  
11 300 research studies like this, to formalize how many participants (i.e. their anticipated events)  
12  
13  
14 301 to include. In order to consider an adequate number of outcome events, we apply "the rule  
15  
16  
17 302 of thumb" that dictates that 10 outcome events are needed for each independent variable  
18  
19  
20 303 (possible predictors); we plan to enrol 320 patients in total, and anticipate that 50% of these  
21  
22 304 will experience a clinical response during the 14-16 week period after therapy with TNFi is  
23  
24  
25 305 initiated. With this in mind: Anticipating that we will see at least 160 events (i.e. clinical  
26  
27 306 responses among the 320 patients), we will have a reasonable power to explore the impact  
28  
29  
30 307 of as many as 16 independent (predictor) variables (including condition and clinical  
31  
32  
33 308 centre).

34  
35 309 If we focus on the contrast between groups, for a comparison of two independent  
36  
37 310 binomial proportions (those with high fibre AND low meat intake vs other) using Pearson's  
38  
39  
40 311 Chi-square statistic with a Chi-square approximation with a two-sided significance level of  
41  
42  
43 312 0.05 ( $P < 0.05$ ), a total sample size of 318 - assuming an "allocation ratio" of 1 to 2 - has an  
44  
45  
46 313 approximate power of 0.924 (i.e. >90% statistical power) if the anticipated proportions  
47  
48  
49 314 responding are 60% and 40%, respectively.

50  
51 315 All the statistical programming will be done in SAS, STATA or R, transparently  
52  
53  
54 316 reporting the source code used to analyse the data. All computational details will be  
55  
56  
57 317 available in the pre-specified SAP, which will be finalised before data collection is  
58  
59 318 complete. Our primary analysis set will be based on those observations that we have  
60

1  
2  
3  
4 319 available at closure; i.e. we will consider 'Data as observed' to be our primary resource for  
5  
6 320 statistical inference. However, for the purpose of sensitivity, multiple sensitivity analyses  
7  
8  
9 321 will be performed to assess the robustness of the primary analyses, including analyses  
10  
11 322 based on the "Non-responder-imputation", and multiple-imputation analyses - which is  
12  
13 323 based on model-based approaches for missing data (these details will be available in the  
14  
15 324 final Statistical Analysis Plan). A simplistic "null responder imputation" would  
16  
17 325 represent a conservative base case, and is likely valid even if data is "missing not at  
18  
19 326 random"<sup>58</sup>, as it assumes and imply that the patients have had no improvement (or  
20  
21 327 worsening) since entering the study.  
22  
23  
24  
25  
26  
27  
28  
29

### 30 **Project organisation**

31  
32  
33  
34 330 The project is organised with a Clinical Research Group (CRG) and an Analytical Research  
35  
36 331 Group (ARG). The CRG includes specialists from the medical, gastroenterological,  
37  
38 332 rheumatological, dermatological and ophthalmological departments that are sampling the  
39  
40 333 cohort. The ARG will perform the analyses on the biological material.  
41  
42  
43

44 334 Furthermore, the project is organised with a steering committee (SC) (including  
45  
46 335 Professor Uffe Holmskov, Professor Jens Kjeldsen, Professor Torkell Ellingsen, and  
47  
48 336 Professor Vibeke Andersen) that is responsible for the scientific follow-up and will be  
49  
50 337 organising meetings for the involved parties. The PI has planned and organised the study  
51  
52 338 and has achieved the legal permissions. The whole group including clinicians and analysts  
53  
54 339 is responsible for the scientific results and the economy.  
55  
56  
57  
58  
59  
60

1  
2  
3  
4 340 Collaboration between patients and health professionals on research projects is  
5  
6 341 relatively new<sup>59-61</sup>. Involvement of patients in research (patient research partners [PRPs])  
7  
8  
9 342 should result in patients' views e.g. on prioritising, being heard and incorporated.  
10  
11 343 Furthermore, individual patients and patient organisations may help in designing research  
12  
13 344 studies, preparing information material, discussing results, dissemination of results, and  
14  
15 345 recruitment of study participants. Recommendations include relevant support and  
16  
17 346 education of PRPs. With this initiative, we wanted to get experiences with including PRPs.  
18  
19 347 Thus this project builds on input from the Danish Colitis-Crohn Association, represented  
20  
21 348 by the director Charlotte Lindgaard Nielsen, the Danish Psoriasis Association, represented  
22  
23 349 by the director Lars Werner, and two individual RA patients from one of the involved  
24  
25 350 departments.  
26  
27  
28  
29  
30  
31

32  
33 351 The SC will hold telephone conferences every 2-4 weeks, and more often when  
34  
35 352 necessary, and face-to-face meetings 3-4 times per year. Among all participants, the SC will  
36  
37 353 organise telephone conferences every 2-4 weeks, and more often when necessary, and  
38  
39 354 face-to-face meetings at start-up and thereafter every year.  
40  
41  
42  
43  
44  
45

#### 46 356 **Perspectives**

47  
48  
49

50 357 The use of prognosis research evidence at multiple stages is highly important on the  
51  
52 358 translational pathway toward improving patient outcome. Prognosis research include  
53  
54 359 various aspects of importance to health care professionals, enabling them to guide the  
55  
56 360 individual patient in terms of shared decision making via overall prognosis, knowledge on  
57  
58  
59  
60

1  
2  
3 361 important prognostic factors, prognostic models, and subsequently (from randomised trial  
4  
5 362 evidence) even stratified medicine<sup>55-62-64</sup>. We anticipate that the BELIEVE study will reveal  
6  
7  
8 363 prognostic factors of importance, such as whether the diet of the patient is likely to interfere  
9  
10 364 with the outcome of being prescribed a TNFi. Also hopefully, by combining various pheno-  
11  
12 365 and geno-type aspects into prognostic models, the BELIEVE might add value in terms of  
13  
14 366 potentially important “personalised medicine” further down the road.

15  
16  
17  
18 367 Interesting findings with the potential of having prognostic value will be sought  
19  
20 368 replicated in other prospective cohorts including a planned study of CID cases from the  
21  
22 369 Danish “Diet, Health and Cancer” cohort and potentially other cohorts with lifestyle data<sup>65</sup>  
23  
24  
25 370<sup>66</sup>.

### 26 27 28 29 371 **Dissemination of results to the public and scientifically**

30  
31  
32 372 The target journal for the primary outcome will be among the general medical journals,  
33  
34 373 because of its general implications (potentially) for family doctors. Subsequently, other  
35  
36 374 hypotheses will be analysed and manuscripts prepared (independently of the findings)  
37  
38 375 which will likely be submitted to specialty journals (e.g. nutritional journals and specific  
39  
40 376 journals for immunology, gastroenterology, rheumatology, dermatology, and  
41  
42 377 ophthalmology).

43  
44  
45  
46  
47  
48 378 Authorship confers credit and has important academic, social, and financial implications,  
49  
50 379 and therefore any authorship on manuscripts coming from BELIEVE study implies  
51  
52 380 responsibility and accountability for published work. In difficult cases we intend to follow  
53  
54 381 the recommendations from the International Committee of Medical Journal Editors  
55  
56 382 (ICMJE) to ensure that contributors who have made substantive intellectual contributions  
57  
58  
59  
60

1  
2  
3  
4 383 to a paper are given credit as authors, but also that contributors credited as authors  
5  
6  
7 384 understand their role in taking responsibility and being accountable for what is published.  
8  
9  
10 385 The ICMJE criteria for authorship intend to distinguish authors from other contributors.  
11  
12  
13 386 based on the following 4 criteria: (i) Substantial contributions to the conception or design of  
14  
15  
16 387 the work; or the acquisition, analysis, or interpretation of data for the work; AND (ii)  
17  
18 388 Drafting the work or revising it critically for important intellectual content; AND (iii) Final  
19  
20  
21 389 approval of the version to be published; AND (iv) Agreement to be accountable for all  
22  
23  
24 390 aspects of the work in ensuring that questions related to the accuracy or integrity of any  
25  
26 391 part of the work are appropriately investigated and resolved.  
27  
28

29 392 In addition to the scientific reporting of results, major findings with translational  
30  
31 393 implications will be communicated to health professionals, patient organisations, public  
32  
33  
34 394 health policy makers, and to the general public through various media and news activities.  
35  
36

37 395

40 396 **Ethics**

41  
42  
43 397 Written informed consent will be obtained from all participants before participation in the  
44  
45  
46 398 study. The project has been approved by The Regional Scientific Ethical Committee  
47  
48 399 (S-20160124) and the Danish Data Protection Agency (2008-58-035). The procedures  
49  
50 400 followed are in accordance with the ethical standards of the responsible committee on  
51  
52  
53 401 human experimentation (institutional and national) and with the Helsinki  
54  
55  
56 402 Declaration of 1975, as revised in 2000.  
57  
58  
59 403

1  
2  
3 404 **Foundation**  
4

5 405 This project is part of a project that has received funding from the European Union's  
6  
7  
8 406 Horizon 2020 Research and Innovation Programme under grant agreement No 733100" (P.  
9  
10 407 Rosenstiel, A. Franke, J. Raes, V. Andersen). Funding has furthermore been received from  
11  
12 408 Odense Patient data Explorative Network (OPEN) (OP-332, V. Andersen), "Knud og Edith  
13  
14 409 Eriksens Mindefond" (V. Andersen), Region of Southern Denmark (V. Andersen),  
15  
16  
17 410 University of Southern Denmark (V. Andersen, U. Holmskov). The Parker Institute,  
18  
19 411 Bispebjerg and Frederiksberg Hospital (R. Christensen, B. Heitmann) is supported by a core  
20  
21  
22 412 grant from the Oak Foundation (OCAY-13-309).  
23  
24

25 413  
26  
27

28 414 **Author Contributions:** V. Andersen, B. Heitmann and R. Christensen wrote the first draft  
29  
30 415 and all authors read and commented the manuscript. All authors accepted the final  
31  
32 416 submitted version.  
33  
34

35 417  
36  
37

38 418 **Conflicts of Interest:**  
39

40  
41 419 All authors declare no conflict of interest. However, the following authors declare: B.  
42  
43 420 Heitmann has received funding from "MatPrat" the information office for Norwegian egg  
44  
45 421 and meat; L. Hvid is in the advisory board for Abbvie A/S; J. Fallingborg is in the advisory  
46  
47 422 boards for AbbVie A/S, MSD Denmark, Takeda Pharma A/S and Ferring Pharmaceuticals  
48  
49 423 A/S; V. Andersen receives compensation for consultancy and for being a member of the  
50  
51 424 advisory board from MSD Denmark (Merck) and Janssen A/S. The funding sponsors had  
52  
53 425 no role in the design of the study; in the collection, analyses, or interpretation of data; in the  
54  
55 426 writing of the manuscript, and in the decision to publish the results.  
56  
57  
58  
59  
60



427

428

**Table 1. Collection of patient characteristics, outcome measures and explanatory**

429

**variables**

| <b>Variable</b>                                                 | <b>Pre</b> | <b>Week<br/>14-16</b> |
|-----------------------------------------------------------------|------------|-----------------------|
| <i>Clinical data<sup>1</sup>:</i>                               |            |                       |
| Gender (w, m)                                                   | X          |                       |
| Age (years)                                                     | X          |                       |
| Diagnosis (disease)                                             | X          |                       |
| Year of diagnosis (year) <sup>2</sup>                           | X          |                       |
| Education (level) <sup>3</sup>                                  | X          |                       |
| Menopause (year)                                                | X          |                       |
| Comorbidity (diseases, Charlson index)                          | X          |                       |
| Medication (predefined choices)                                 | X          | X                     |
| Diet (FFQ) <sup>3</sup> (predefined choices)                    | X          |                       |
| Changes in diet (predefined choices)                            |            | X                     |
| Non-dietary lifestyle factors <sup>3</sup> (predefined choices) | X          | X                     |
|                                                                 |            |                       |
| <i>Investigations:</i>                                          |            |                       |
| Height (cm)                                                     | X          |                       |
| Weight (kg)                                                     | X          | X                     |

|                                          |      |   |
|------------------------------------------|------|---|
| Body mass index (kg/cm <sup>2</sup> )    | X    | X |
| Routine blood analyses <sup>4</sup>      | X    | X |
| Endoscopy <sup>5</sup>                   | X    | X |
|                                          |      |   |
| <b>Biological samples<sup>6</sup>:</b>   |      |   |
| Fasting blood samples                    | X    | X |
| Faeces samples                           | X    | X |
| Urine samples                            | X    | X |
| Biopsies <sup>5</sup>                    | X    | X |
|                                          |      |   |
| <b>Crohn's disease (CD)</b>              |      |   |
| Disease location (predefined choices)    | X    |   |
| Prior operations (y/n, description)      | X    |   |
| Disease behaviour (fistulising, luminal) | X    |   |
| Perianal involvement (y/n)               | X    |   |
| STRIDE – (y/n)                           | n.a. | X |
| Abdominal pain (y/n)                     | X    | X |
| Diarrhoea (y/n)                          | X    | X |
| Altered bowel habit (y/n)                | X    | X |
| SES-CD (score)                           | X    | X |
| Presence of ulcers (score)               | X    | X |

|                                                                                                                                                    |          |          |
|----------------------------------------------------------------------------------------------------------------------------------------------------|----------|----------|
| Ulcerated surface (score)                                                                                                                          | X        | X        |
| Affected surface (score)                                                                                                                           | X        | X        |
| Presence of narrowings (score)                                                                                                                     | X        | X        |
| Number of affected segments (score)                                                                                                                | X        | X        |
| Alterations of cross-sectional imaging (MR, CT, UL) (y/n) <sup>7</sup>                                                                             | X        | X        |
| HBI index (score)                                                                                                                                  | X        | X        |
| <b>*HBI of 4 or less (y/n)</b>                                                                                                                     | <b>X</b> | <b>X</b> |
| General well-being (score)                                                                                                                         | X        | X        |
| Abdominal pain (score)                                                                                                                             | X        | X        |
| No. of liquid stools per day (N)                                                                                                                   | X        | X        |
| Abdominal mass (score)                                                                                                                             | X        | X        |
| Manifestations (abscess, fistulas, fissures, arthralgia, uveitis, erythema nodosum, pyoderma gangrenosum, mouth ulcers, one point for each)<br>(N) | X        | X        |
| Physician Global Assessment (score)                                                                                                                | X        | X        |
| Physician Global Assessment (0–100 mm VAS)                                                                                                         | X        | X        |
| Patient Global Assessment (0–100 mm VAS)                                                                                                           | X        | X        |
| Corticosteroid-free remission <sup>8</sup> (y/n)                                                                                                   |          | X        |
| Concomitant medication (y,n, predefined choices)                                                                                                   | X        | X        |
| Number of draining fistulas (fistulising CD)                                                                                                       | X        | X        |
|                                                                                                                                                    |          |          |

|                                                                               |          |          |
|-------------------------------------------------------------------------------|----------|----------|
| <b><i>Ulcerative Colitis (UC)</i></b>                                         |          |          |
| Disease location (predefined choices)                                         | X        |          |
| Prior operations (y/n, description)                                           | X        |          |
| STRIDE criteria (y/n)                                                         | n.a.     | X        |
| Rectal bleeding (y/n)                                                         | X        | X        |
| Altered bowel habit (y/n)                                                     | X        | X        |
| Endoscopic remission (Mayo endoscopic subscore of 0-1)                        | X        | X        |
| <b>*Mayo Clinical Score of 2 or less with no individual subscore of &gt;1</b> | <b>X</b> | <b>X</b> |
| Mayo "normal mucosal appearance" (y/n)                                        | X        | X        |
| Mayo clinical response <sup>9</sup> (y/n)                                     | X        | X        |
| Mayo clinical score (score)                                                   | X        | X        |
| Mayo endoscopic subscore (score)                                              | X        | X        |
| Stools (score)                                                                | X        | X        |
| Rectal bleeding (score)                                                       | X        | X        |
| Physician Global Assessment (score)                                           | X        | X        |
| <b>*Mayo Clinical Score of 2 or less with no individual subscore of &gt;1</b> | <b>X</b> | <b>X</b> |
| Mayo "normal mucosal appearance" (y/n)                                        | X        | X        |
| Mayo clinical response <sup>9</sup> (y/n)                                     | X        | X        |
| SCCAI (score)                                                                 | X        | X        |
| Bowel frequency (day) (score)                                                 | X        | X        |
| Bowel frequency (night) (score)                                               | X        | X        |

|                                                  |             |          |
|--------------------------------------------------|-------------|----------|
| Urgency of defecation (score)                    | X           | X        |
| Blood in stool (score)                           | X           | X        |
| General well-being (score)                       | X           | X        |
| Extracolonic features (1 per manifestation)      | X           | X        |
| Physician Global Assessment (0–100 mm VAS)       | X           | X        |
| Patient Global Assessment (0–100 mm VAS)         | X           | X        |
| Corticosteroid-free remission <sup>8</sup> (y/n) |             | X        |
| Concomitant medication (y,n, predefined choices) | X           | X        |
|                                                  |             |          |
| <b><i>Rheumatoid arthritis (RA)</i></b>          |             |          |
| Positive for anti-CCP/RF (y/n)                   | X           |          |
| Swollen-joint count (of 28/66 joints examined)   | X           | X        |
| Tender-joint count (of 28/68 joints examined)    | X           | X        |
| DAS28-CRP (score)                                | X           | X        |
| Simplified Disease Activity Index (SDAI) (score) | X           | X        |
| <b>*ACR20 (y/n)</b>                              | <b>n.a.</b> | <b>X</b> |
| ACR50 (y/n)                                      | n.a.        | X        |
| ACR70 (y/n)                                      | n.a.        | X        |
| EULAR good or moderate response (y/n)            | n.a.        | X        |
| Low Disease Activity (DAS28 <3.2)                | n.a.        | X        |
| DAS28 Remission (DAS28 <2.6)                     | n.a.        | X        |

|                                                              |             |          |
|--------------------------------------------------------------|-------------|----------|
| Physician Global Assessment (0-100 mm VAS)                   | X           | X        |
| Patient Global Assessment (0-100 mm VAS)                     | X           | X        |
| Patient assessment of pain (0-100 mm VAS)                    | X           | X        |
| HAQ-DI                                                       | X           | X        |
| HAQ (score)                                                  | X           | X        |
|                                                              |             |          |
| <b><i>Axial spondyloarthritis (axSpA)</i></b>                |             |          |
| Positive for HLA-B27 (y/n)                                   | X           |          |
| BASDAI (score)                                               | X           | X        |
| BASFI (score)                                                | X           | X        |
| BASMI (score)                                                |             |          |
| Total score for back pain (0–100 mm VAS)                     | X           | X        |
| Patient global assessment of disease activity (0-100 mm VAS) | X           | X        |
| Patient assessment of pain (0-100 mm VAS)                    | X           | X        |
| Physician Global Assessment (0-100 mm VAS)                   | X           | X        |
| <b>*ASAS20 (y/n)</b>                                         | <b>n.a.</b> | <b>X</b> |
| ASAS40 (y/n)                                                 | n.a.        | X        |
| ASAS Partial response (y/n)                                  | n.a.        | X        |
| ASAS5/6 response (y/n)                                       | n.a.        | X        |
|                                                              |             |          |
| <b><i>Psoriatic arthritis (PsA)</i></b>                      |             |          |

|                                                              |             |          |
|--------------------------------------------------------------|-------------|----------|
| Dactylitis (y/n)                                             | X           | X        |
| Enthesitis (y/n)                                             | X           | X        |
| PASI (score)                                                 | X           | X        |
| PASI 75 response (y/n)                                       | n.a.        | X        |
| PASI 90 response (y/n)                                       | n.a.        | X        |
| <b>*ACR20</b>                                                | <b>n.a.</b> | <b>X</b> |
| Swollen-joint count (of 28/66 joints examined)               | X           | X        |
| Tender-joint count (of 28/68 joints examined)                | X           | X        |
| DAS28-CRP (score)                                            | X           | X        |
| Patient Global Assessment of disease activity (0-100 mm VAS) | X           | X        |
| Patient Assessment of PsA pain (0-100 mm VAS)                | X           | X        |
| Physician Global Assessment (0-100 mm VAS)                   | X           | X        |
| Simplified Disease Activity Index (SDAI)                     | X           | X        |
| HAQ-DI                                                       | X           | X        |
| HAQ (score)                                                  | X           | X        |
|                                                              |             |          |
| <b><i>Psoriasis (PsO)</i></b>                                |             |          |
| Psoriatic arthritis (y/n)                                    | X           | X        |
| PASI (score)                                                 | X           | X        |
| <b>*PASI75 response (y/n)</b>                                | <b>n.a.</b> | <b>X</b> |
| PASI90 response (y/n)                                        | n.a.        | X        |

|                                                                                                                |             |          |
|----------------------------------------------------------------------------------------------------------------|-------------|----------|
| Patient Global Assessment of disease activity (0-100 mm VAS)                                                   | X           | X        |
| Patient Assessment of PsA pain (0-100 mm VAS)                                                                  | X           | X        |
| Physician Global Assessment (0-100 mm VAS)                                                                     | X           | X        |
| DLQI (score)                                                                                                   | X           | X        |
|                                                                                                                |             |          |
| <i>Hidradenitis Suppurativa (HS)</i>                                                                           |             |          |
| <b>*HiSCR response</b>                                                                                         | <b>n.a.</b> | <b>X</b> |
| Hurley stage <sup>10</sup> (score)                                                                             | X           | X        |
| Previous systemic treatment (y/n, description)                                                                 | X           |          |
| Prior surgery (y/n, description)                                                                               | X           |          |
| Lesion counts (N)                                                                                              | X           | X        |
| Total no. of abscesses and inflammatory nodules (N)                                                            | X           | X        |
| No. of abscesses (N)                                                                                           | X           | X        |
| No. of inflammatory nodules (N)                                                                                | X           | X        |
| No. of draining fistulas (N)                                                                                   | X           | X        |
| Modified Sartorius score (score)                                                                               | X           | X        |
| Percentage of Participants who achieve Abscess and Inflammatory Nodule (AN) Count of 0, 1, and 2, respectively | X           | X        |
| Patient Global Assessment of skin pain (score)                                                                 | X           | X        |
| DLQI (score)                                                                                                   | X           | X        |
|                                                                                                                |             |          |



|                                                                                                                                                                 |             |          |
|-----------------------------------------------------------------------------------------------------------------------------------------------------------------|-------------|----------|
| <i>Non-infectious Uveitis (NiU)</i>                                                                                                                             |             |          |
| SUN (score)                                                                                                                                                     | X           | X        |
| <b>*Uveitis treatment failure (y/n)</b>                                                                                                                         | <b>n.a.</b> | <b>X</b> |
| New active, inflammatory chorioretinal or retinal vascular lesions relative to Baseline (y/n)                                                                   | X           | X        |
| Inability to achieve $\leq 0.5+$ or a 2-step increase relative to best state achieved at all visits in anterior chamber cell grade or vitreous haze grade (y/n) | X           | X        |
| Worsening of best corrected visual acuity by $\geq 15$ letters relative to best state achieved (y/n)                                                            | X           | X        |
|                                                                                                                                                                 |             |          |
| <i>Health-related quality of Life<sup>11</sup></i>                                                                                                              | <b>X</b>    | <b>X</b> |
| SF12 (score)                                                                                                                                                    | X           | X        |
| SHS (score)                                                                                                                                                     | X           | X        |
| Physician Global Assessment (0–100 mm VAS)                                                                                                                      | X           | X        |
| Patient Global Assessment (0–100 mm VAS)                                                                                                                        | X           | X        |
| ROME-III (score)                                                                                                                                                | X           | X        |
| NYHA (score)                                                                                                                                                    | X           | X        |
| Cont. anti-TNF treatment (y/n, predefined choices for stopping if no)                                                                                           | X           | X        |
|                                                                                                                                                                 |             |          |
| <i>Adverse events</i>                                                                                                                                           |             |          |

|                                                  |   |   |
|--------------------------------------------------|---|---|
| Discontinuation due to adverse events (y/n)      |   | X |
| Serious adverse event (y/n)                      |   | X |
| Death (y/n)                                      |   | X |
| Occurrence of surgery (y/n)                      |   | X |
| Occurrence of hospital admission (y/n)           |   | X |
| Occurrence of disease-related complication (y/n) |   | X |
|                                                  |   |   |
| <i>Laboratory</i> <sup>4</sup>                   |   |   |
| CRP (mg/l) <sup>12</sup>                         | X | X |

**\*Primary endpoint for the individual diseases**

<sup>1</sup>Data will be collected using a questionnaire, local and National registries.

<sup>2</sup>Registry data will be retrieved from the Danish registries using the Danish individual civil registration number (CPR) including BIO-IBD<sup>67</sup>, DANBIO<sup>68</sup>, DERMBIO<sup>69</sup> (database on IBD, RA, HS, axSpA, PsA, and PsO patients on biological therapy), the National Patient Registry (e.g. comorbidity), registries on medication and use of receipts, local laboratory databases (laboratory data) and the electronic patient records (side effects).

<sup>3</sup>Lifestyle (dietary and non-dietary) will be registered using a validated food-frequency questionnaire (FFQ) that includes food items and a photographic food atlas of picture series of portion sizes will be used to assess intake of food groups, such as meat and dairy, and calculate total energy, fiber, protein, fat sugar and carbohydrate intakes as well as glycemic index and load. In addition, questions on non-diet lifestyle factors (smoking, physical

1  
2  
3  
4 activity, alcohol consumption and use of over-the counter medicine [use of probiotics,  
5  
6 pre-probiotics, painkillers, laxatia, and anti-diarrhoea agents]) as well as educational level  
7  
8 and year of menopause (women) are included<sup>70</sup>. The follow-up questionnaire is identical to  
9  
10 the initial questionnaire apart from the questions on food items that only contains  
11  
12 questions on changes of diet since the last questionnaire.  
13  
14

15  
16  
17 <sup>4</sup>Routine blood analyses include C-reactive protein (CRP), haemoglobin, erythrocyte  
18  
19 count, haematocrit, erythrocyte mean cell volume (MCV), mean cell hemoglobin (MCH)  
20  
21 and mean cell haemoglobin concentration (MCHC), leucocyte count, differential count,  
22  
23 thrombocytes, albumin, K<sup>+</sup> potassium, Na<sup>+</sup> sodium, creatinine, coagulation factor II+VII+X,  
24  
25 alanine amino transferase (ALAT), alkaline phosphatase, gamma-glutamyl transferase  
26  
27 (GGT), haemoglobin glycation (Hb1Ac), lipids (cholesterol, high density, low density  
28  
29 cholesterol), and transglutaminase.  
30  
31  
32

33  
34  
35 <sup>5</sup>Only IBD patients  
36

37  
38 <sup>6</sup>From all participants, blood, urine, and faeces are sampled. In addition, from IBD patients,  
39  
40 intestinal biopsies are sampled. In selected cases, additional biological material on  
41  
42 participants from this study may be retrieved from the Patobank and the Danish Biobank.  
43  
44 The samples will be collected adhering to the Sample PRE-analytical Code (SPREC) and  
45  
46 Biospecimen Reporting for Improved Study Quality (BRISQ) guidelines, using Standard  
47  
48 Operational Procedure (SOPs) describing and logging primary container, centrifugation  
49  
50 conditions, centrifugation parameters and storage conditions<sup>71 72</sup>. The biological material  
51  
52 will be stored at OPEN (biological material from OUH) or at SHS (biological material from  
53  
54  
55  
56  
57  
58  
59  
60

1  
2  
3  
4 the other hospitals).

5  
6  
7 <sup>7</sup>Only CD patients when endoscopy cannot adequately evaluate inflammation.

8  
9  
10  
11  
12 <sup>8</sup>Corticosteroid-free remission. Clinical remission in patients using oral corticosteroids at  
13 baseline (Pre) that have discontinued corticosteroids and are in clinical remission at first  
14 follow-up.

15  
16  
17  
18  
19  
20  
21  
22 <sup>9</sup>A reduction in complete Mayo score of  $\geq 3$  points and  $\geq 30\%$  from baseline (or a partial  
23 Mayo score of  $\geq 2$  points and  $\geq 25\%$  from baseline, if the complete Mayo score was not  
24 performed at the visit) with an accompanying decrease in rectal bleeding subscore of  $\geq 1$   
25 point or absolute rectal bleeding subscore of  $\leq 1$  point

26  
27  
28  
29  
30  
31  
32  
33  
34  
35  
36  
37  
38 <sup>10</sup>Data for the Hurley stage reflect actual assessment. A patient's overall Hurley stage is the  
39 highest stage across all affected anatomical sites. Stage 1 is defined as localized formation of  
40 single or multiple abscesses without sinus tracts or scarring, stage II as recurrent abscesses  
41 (single or multiple) with sinus tract formation and scarring, and stage III as multiple  
42 abscesses with extensive, interconnected sinus tracts and scarring.

43  
44  
45  
46  
47 <sup>11</sup>All participants will be asked whether they have any complaints regarding or are known  
48 with diseases affecting the bowel, the skin, rheumatic complains etc. and if no to both  
49 questions they will not be asked to complete the relevant questionnaire.

50  
51  
52  
53 <sup>12</sup>Biological response defined as a drop in CRP level of more than 25% or to normal level  
54 among patients with an elevated CRP before treatment (higher than normal range)<sup>73</sup>.

55  
56  
57  
58 Abbreviations; ACR, American College of Rheumatology; ASAS20/40, Assessment of  
59 Spondyloarthritis International Society; CRP, C-reactive Protein; DAS28, Disease Activity  
60

1  
2  
3  
4 Score: DLQI<sup>74, 75</sup>, Dermatology Life Quality Index; FFQ, Food frequency questionnaire;  
5  
6 Harvey and Bradshaw Index, HBI; HiSCR<sup>50</sup>, Hidradenitis Suppurativa Clinical Response;  
7  
8 HAQ1, Health Assessment Questionnaire 1; NYHA, New York Heart Association, PASI,  
9  
10 Psoriasis Area and Severity Index; SCCAI, Simple Clinical Colitis Activity Index; SES-CD,  
11  
12 Simple Endoscopic Score for Crohn's Disease; SF12, Short Form Health Survey; SHS<sup>76, 77</sup>,  
13  
14 Short Health Scale; SUN, Standardization of Uveitis Nomenclature for Reporting Clinical  
15  
16 Data; STRIDE, Selecting Therapeutic Targets in Inflammatory Bowel Disease <sup>52</sup>  
17  
18  
19  
20  
21

430

1  
2  
3 431 **FIGURE LEGENDS**  
4

5 432 **Figure 1. Hypothesis for effects of diet in relation to treatment effect**  
6

7  
8 433 **(Left)** Low levels of fibre intake may promote microbial metabolism of mucus as the main  
9  
10 434 energy source<sup>36 78 79</sup>. This will lead to decrease of the mucus layer. Further, degradation of mucus  
11  
12 435 releases free sulphate which would then become available for utilisation by sulphate-reducing  
13  
14 436 bacteria (like *Bilophila wadsworthia*) for microbial produced hydrogen sulphide<sup>80</sup>. In addition, high  
15  
16 437 intake of food containing organic sulphur and sulphate additives, such as meat and processed meat,  
17  
18 438 may increase the amount of sulphate for microbial produced hydrogen sulphide<sup>81 82</sup>. The resultant  
19  
20 439 hydrogen sulphide from low intake of fibre and high intake of meat may reduce the disulphide  
21  
22 440 bonds in the mucus network rendering the mucus layer penetrable to e.g. bacteria<sup>80 83</sup>. Then,  
23  
24 441 microbial-associated molecular patterns (MAMPs) from microbes or contained in the diet may reach  
25  
26 442 the epithelium and activate the pattern recognition receptors (PRR) such as Toll-like receptors  
27  
28 443 (TLRs) on the enterocytes (intestinal epithelial cells, IEC), and next activate nuclear factor-kappa B  
29  
30 444 (NFkB), type I interferon (IFN), and other inflammatory pathways. This leads to production of  
31  
32 445 pro-inflammatory (tumour necrosis factor- $\alpha$  (TNF), interleukin (IL)-1 $\beta$ , IL-6, IFN, IL-17 etc.) and  
33  
34 446 anti-inflammatory (primarily IL-10) cytokines and chemokines that will next activate innate  
35  
36 447 lymphocytic cells (ILC) and other immune cells and the immune system in general<sup>84 85</sup>. There is some  
37  
38 448 support for such a mechanism in CID, including findings of; high amounts of sulphate-reducing  
39  
40 449 bacteria in UC patients<sup>80 86</sup>, an association between the highest tertiles of carbohydrate-restricted diet  
41  
42 450 and RA, in a nested case-control study among 386 individuals who developed RA and 1886 matched  
43  
44 451 controls from the Swedish Västerbotten Intervention Program (VIP) cohort with prospectively  
45  
46 452 sampled dietary survey<sup>87</sup>, association of high fibre intake with low risk of CD among 170 776  
47  
48 453 participants from the prospective Nurses' Health Study I (NHSI)<sup>22</sup>, association of high intake of red  
49  
50 454 meat and total protein and risk of developing inflammatory polyarthritis in the population-based  
51  
52 455 prospective cohort of 25 630 participants from the European Prospective Investigation of Cancer in  
53  
54 456 Norfolk (EPIC-Norfolk)<sup>34</sup>. Finally, a prospective study of 191 UC patients in remission found that  
55  
56  
57  
58  
59  
60

1  
2  
3 457 high consumption of meat, particularly red and processed meat, protein, and alcohol, was associated  
4  
5 458 with risk of relapse and that high sulphur or sulphate intakes may offer an explanation for the  
6  
7 459 observed findings<sup>88</sup>. Additionally, support of the notation that diet may affect systemic immune  
8  
9 460 response is provided by the finding that intake of low-glycemic index diet was found to lower  
10  
11 461 secretion of TNF and IL-6 from stimulated peripheral blood mononuclear cells from obese humans<sup>89</sup>.  
12  
13  
14 462 **(Right)** Intake of high fibre and low meat may promote an effective mucosal barrier and support the  
15  
16 463 effects of anti-TNF treatment outcome. Intake of soluble plant fibre has been found to block bacterial  
17  
18 464 adhesion to gut enterocytes in animal and cell studies<sup>90</sup>. The genetic architecture of the individual  
19  
20 465 may also impact the influence of lifestyle factors<sup>14</sup>. Hence, in order to provide lifestyle  
21  
22 466 recommendations, we need to understand the effects of lifestyle on the immune system, and how  
23  
24 467 lifestyle may improve the therapeutic outcome and reduce the need of medical treatment in the  
25  
26 468 individual person. Information on diet and non-diet lifestyle exposures may be collected by using  
27  
28 469 e.g. questionnaires and lifestyle-associated biomarkers or the combination of these methods<sup>91-93</sup>.  
29  
30  
31 470 Evidence-based biomarkers for lifestyle assessment are scarce<sup>94-114</sup> and mostly used for studies on  
32  
33 471 healthy individuals<sup>115-118</sup>.

34  
35  
36  
37 472 **Figure 2. Organisation and patients research partners (PRPs)**  
38  
39  
40  
41  
42  
43  
44  
45  
46  
47  
48  
49  
50  
51  
52  
53  
54  
55  
56  
57  
58  
59  
60

## 473 Reference List

474

475 1. Baumgart DC, Carding SR. Inflammatory bowel disease: cause and immunobiology.

476 *Lancet* 2007;369(9573):1627-40. doi: 10.1016/S0140-6736(07)60750-8

477 2. Baumgart DC, Sandborn WJ. Inflammatory bowel disease: clinical aspects and established

478 and evolving therapies. *Lancet* 2007;369(9573):1641-57. doi:

479 10.1016/S0140-6736(07)60751-X

480 3. Strober W, Fuss I, Mannon P. The fundamental basis of inflammatory bowel disease. *The*481 *Journal of clinical investigation* 2007;117(3):514-21. doi: 10.1172/JCI30587

482 4. Taurog JD, Chhabra A, Colbert RA. Ankylosing Spondylitis and Axial Spondyloarthritis.

483 *The New England journal of medicine* 2016;374(26):2563-74. doi:

484 10.1056/NEJMra1406182 [published Online First: 2016/06/30]

485 5. Molodecky NA, Soon IS, Rabi DM, et al. Increasing incidence and prevalence of the

486 inflammatory bowel diseases with time, based on systematic review.

487 *Gastroenterology* 2012;142(1):46-54.e42; quiz e30. doi:

488 10.1053/j.gastro.2011.10.001 [published Online First: 2011/10/18]

489 6. WHO. <http://www.who.int/chp/topics/rheumatic/en/>. 20.2.2017

490 7. Poddubnyy D, Rudwaleit M. Efficacy and safety of adalimumab treatment in patients with

491 rheumatoid arthritis, ankylosing spondylitis and psoriatic arthritis. *Expert opinion on*492 *drug safety* 2011;10(4):655-73. doi: 10.1517/14740338.2011.581661 [published

493 Online First: 2011/05/11]



- 1  
2  
3  
4 494 8. Cross M, Smith E, Hoy D, et al. The global burden of rheumatoid arthritis: estimates from  
5  
6 495 the global burden of disease 2010 study. *Annals of the rheumatic diseases*  
7  
8  
9 496 2014;73(7):1316-22. doi: 10.1136/annrheumdis-2013-204627 [published Online  
10  
11  
12 497 First: 2014/02/20]
- 13  
14 498 9. Parisi R, Symmons DP, Griffiths CE, et al. Global epidemiology of psoriasis: a systematic  
15  
16  
17 499 review of incidence and prevalence. *The Journal of investigative dermatology*  
18  
19  
20 500 2013;133(2):377-85. doi: 10.1038/jid.2012.339 [published Online First: 2012/09/28]
- 21  
22 501 10. Kaplan GG. The global burden of IBD: from 2015 to 2025. *Nature reviews*  
23  
24  
25 502 *Gastroenterology & hepatology* 2015;12(12):720-7. doi:  
26  
27 503 10.1038/nrgastro.2015.150 [published Online First: 2015/09/02]
- 28  
29  
30 504 11. Scott DL, Wolfe F, Huizinga TW. Rheumatoid arthritis. *Lancet*  
31  
32  
33 505 2010;376(9746):1094-108.
- 34  
35 506 12. Lettre G, Rioux JD. Autoimmune diseases: insights from genome-wide association  
36  
37  
38 507 studies. *HumMolGenet* 2008;17(R2):R116-R21.
- 39  
40 508 13. Ellinghaus D, Jostins L, Spain SL, et al. Analysis of five chronic inflammatory diseases  
41  
42  
43 509 identifies 27 new associations and highlights disease-specific patterns at shared loci.  
44  
45  
46 510 *Nature genetics* 2016;48(5):510-8. doi: 10.1038/ng.3528 [published Online First:  
47  
48 511 2016/03/15]
- 49  
50  
51 512 14. Yadav P, Ellinghaus D, Remy G, et al. Genetic Factors Interact With Tobacco Smoke to  
52  
53  
54 513 Modify Risk for Inflammatory Bowel Disease in Humans and Mice.  
55  
56 514 *Gastroenterology* 2017 doi: 10.1053/j.gastro.2017.05.010 [published Online First:  
57  
58 515 2017/05/17]
- 59  
60

- 1  
2  
3  
4 516 15. Liu JZ, van Sommeren S, Huang H, et al. Association analyses identify 38 susceptibility  
5  
6 517 loci for inflammatory bowel disease and highlight shared genetic risk across  
7  
8 518 populations. *Nature genetics* 2015;47(9):979-86. doi: 10.1038/ng.3359 [published  
9  
10 Online First: 2015/07/21]  
11  
12  
13  
14 520 16. Cortes A, Hadler J, Pointon JP, et al. Identification of multiple risk variants for  
15  
16 521 ankylosing spondylitis through high-density genotyping of immune-related loci.  
17  
18 522 *Nature genetics* 2013;45(7):730-8. doi: 10.1038/ng.2667 [published Online First:  
19  
20 2013/06/12]  
21  
22 523  
23  
24 524 17. Bowes J, Budu-Aggrey A, Huffmeier U, et al. Dense genotyping of immune-related  
25  
26 525 susceptibility loci reveals new insights into the genetics of psoriatic arthritis. *Nature*  
27  
28 526 *communications* 2015;6:6046. doi: 10.1038/ncomms7046 [published Online First:  
29  
30 2015/02/06]  
31  
32 527  
33  
34 528 18. Okada Y, Wu D, Trynka G, et al. Genetics of rheumatoid arthritis contributes to biology  
35  
36 529 and drug discovery. *Nature* 2014;506(7488):376-81. doi: 10.1038/nature12873  
37  
38 530 [published Online First: 2014/01/07]  
39  
40  
41 531 19. Tsoi LC, Spain SL, Knight J, et al. Identification of 15 new psoriasis susceptibility loci  
42  
43 532 highlights the role of innate immunity. *Nature genetics* 2012;44(12):1341-8. doi:  
44  
45 533 10.1038/ng.2467 [published Online First: 2012/11/13]  
46  
47  
48  
49 534 20. Ananthakrishnan AN, Khalili H, Higuchi LM, et al. Higher predicted vitamin D status is  
50  
51 535 associated with reduced risk of Crohn's disease. *Gastroenterology*  
52  
53 536 2012;142(3):482-9. doi: 10.1053/j.gastro.2011.11.040 [published Online First:  
54  
55 537 2011/12/14]  
56  
57  
58  
59  
60

- 1  
2  
3  
4 538 21. Ananthakrishnan AN, Khalili H, Konijeti GG, et al. Long-term intake of dietary fat and  
5  
6 539 risk of ulcerative colitis and Crohn's disease. *Gut* 2014;63(5):776-84. doi:  
7  
8  
9 540 10.1136/gutjnl-2013-305304 [published Online First: 2013/07/06]  
10  
11 541 22. Ananthakrishnan AN, Khalili H, Konijeti GG, et al. A prospective study of long-term  
12  
13  
14 542 intake of dietary fiber and risk of Crohn's disease and ulcerative colitis.  
15  
16  
17 543 *Gastroenterology* 2013;145(5):970-7. doi: 10.1053/j.gastro.2013.07.050 [published  
18  
19  
20 544 Online First: 2013/08/06]  
21  
22 545 23. Ananthakrishnan AN, Khalili H, Song M, et al. Zinc intake and risk of Crohn's disease  
23  
24  
25 546 and ulcerative colitis: a prospective cohort study. *International journal of*  
26  
27  
28 547 *epidemiology* 2015;44(6):1995-2005. doi: 10.1093/ije/dyv301 [published Online  
29  
30  
31 548 First: 2015/11/08]  
32  
33 549 24. Ananthakrishnan AN, Khalili H, Song M, et al. High School Diet and Risk of Crohn's  
34  
35  
36 550 Disease and Ulcerative Colitis. *Inflammatory bowel diseases* 2015;21(10):2311-9.  
37  
38 551 doi: 10.1097/mib.0000000000000501 [published Online First: 2015/08/04]  
39  
40  
41 552 25. Chan SS, Luben R, Olsen A, et al. Association between high dietary intake of the n-3  
42  
43  
44 553 polyunsaturated fatty acid docosahexaenoic acid and reduced risk of Crohn's disease.  
45  
46  
47 554 *Alimentary pharmacology & therapeutics* 2014;39(8):834-42. doi:  
48  
49 555 10.1111/apt.12670 [published Online First: 2014/03/13]  
50  
51 556 26. Chan SS, Luben R, Olsen A, et al. Body mass index and the risk for Crohn's disease and  
52  
53  
54 557 ulcerative colitis: data from a European Prospective Cohort Study (The IBD in EPIC  
55  
56  
57 558 Study). *The American journal of gastroenterology* 2013;108(4):575-82. doi:  
58  
59 559 10.1038/ajg.2012.453 [published Online First: 2013/01/16]  
60

- 1  
2  
3  
4 560 27. Chan SS, Luben R, van Schaik F, et al. Carbohydrate intake in the etiology of Crohn's  
5  
6 561 disease and ulcerative colitis. *Inflammatory bowel diseases* 2014;20(11):2013-21.  
7  
8  
9 562 doi: 10.1097/mib.000000000000168 [published Online First: 2014/09/30]  
10  
11  
12 563 28. John S, Luben R, Shrestha SS, et al. Dietary n-3 polyunsaturated fatty acids and the  
13  
14 564 aetiology of ulcerative colitis: a UK prospective cohort study. *European journal of*  
15  
16  
17 565 *gastroenterology & hepatology* 2010;22(5):602-6. doi:  
18  
19 566 10.1097/MEG.0b013e3283352d05  
20  
21  
22 567 29. de Silva PS, Luben R, Shrestha SS, et al. Dietary arachidonic and oleic acid intake in  
23  
24 568 ulcerative colitis etiology: a prospective cohort study using 7-day food diaries.  
25  
26  
27 569 *European journal of gastroenterology & hepatology* 2014;26(1):11-8. doi:  
28  
29 570 10.1097/MEG.0b013e328365c372 [published Online First: 2013/11/13]  
30  
31  
32 571 30. de Silva PS, Olsen A, Christensen J, et al. An association between dietary arachidonic  
33  
34 572 acid, measured in adipose tissue, and ulcerative colitis. *Gastroenterology*  
35  
36 573 2010;139(6):1912-17.  
37  
38  
39 574 31. Hart AR, Luben R, Olsen A, et al. Diet in the aetiology of ulcerative colitis: a European  
40  
41 575 prospective cohort study. *Digestion* 2008;77(1):57-64.  
42  
43  
44 576 32. Opstelten J, Leenders M, Dik V, et al. Dairy products, dietary calcium and the risk of  
45  
46 577 inflammatory bowel disease: results from a European prospective cohort  
47  
48 578 investigation. *Journal of Crohns & Colitis* 2016;10:S462.  
49  
50  
51 579 33. Lahiri M, Luben RN, Morgan C, et al. Using lifestyle factors to identify individuals at  
52  
53 580 higher risk of inflammatory polyarthritis (results from the European Prospective  
54  
55 581 Investigation of Cancer-Norfolk and the Norfolk Arthritis Register--the  
56  
57  
58  
59  
60

- 1  
2  
3  
4 582 EPIC-2-NOAR Study). *Annals of the rheumatic diseases* 2014;73(1):219-26. doi:  
5  
6 10.1136/annrheumdis-2012-202481 [published Online First: 2013/03/19]  
7 583  
8  
9 584 34. Pattison DJ, Symmons DP, Lunt M, et al. Dietary risk factors for the development of  
10  
11 585 inflammatory polyarthritis: evidence for a role of high level of red meat consumption.  
12  
13 *Arthritis and rheumatism* 2004;50(12):3804-12. doi: 10.1002/art.20731 [published  
14 586  
15 Online First: 2004/12/14]  
16 587  
17  
18 588 35. Lund H, Brunnhuber K, Juhl C, et al. Towards evidence based research. *BMJ (Clinical*  
19  
20 *research ed)* 2016;355:i5440. doi: 10.1136/bmj.i5440 [published Online First:  
21 589  
22 2016/11/01]  
23 590  
24  
25 591 36. Andersen V, Hansen AK, Heitmann AB. Potential Impact of Diet on Treatment Effect  
26  
27 592 from Anti-TNF Drugs in Inflammatory Bowel Disease. *Nutrients* 2017;9(3) doi:  
28  
29 10.3390/nu9030286 [published Online First: 2017/03/16]  
30 593  
31  
32 594 37. Heatley RV. Nutritional replenishment as an alternative to TNF-alpha in Crohn's disease.  
33  
34 *Lancet* 1997;349(9066):1702. [published Online First: 1997/06/07]  
35 595  
36  
37 596 38. Lee D, Baldassano RN, Otley AR, et al. Comparative Effectiveness of Nutritional and  
38  
39 597 Biological Therapy in North American Children with Active Crohn's Disease.  
40  
41 *Inflammatory bowel diseases* 2015;21(8):1786-93. doi:  
42 598  
43 10.1097/mib.0000000000000426 [published Online First: 2015/05/15]  
44 599  
45  
46 600 39. Andersen V, Holmskov U, Sorensen SB, et al. A Proposal for a Study on Treatment  
47  
48 601 Selection and Lifestyle Recommendations in Chronic Inflammatory Diseases: A  
49  
50 602 Danish Multidisciplinary Collaboration on Prognostic Factors and Personalised  
51  
52  
53  
54  
55  
56  
57  
58  
59  
60

- 1  
2  
3  
4 603 Medicine. *Nutrients* 2017;9(5) doi: 10.3390/nu9050499 [published Online First:  
5  
6 604 2017/05/16]  
7  
8  
9 605 40. RADS. Rådet for Anvendelse af Dyr Sygehusmedicin, <http://www.rads.dk/> 20.2.2017  
10  
11 606 [accessed 20.2.2017 2017].  
12  
13  
14 607 41. Ali FM, Johns N, Finlay A, et al. Comparison of the paper-based and electronic versions  
15  
16  
17 608 of the Dermatology Life Quality Index (DLQI): evidence of equivalence. *The British*  
18  
19 609 *journal of dermatology* 2017 doi: 10.1111/bjd.15314 [published Online First:  
20  
21 610 2017/01/24]  
22  
23  
24 611 42. Campbell N, Ali F, Finlay AY, et al. Equivalence of electronic and paper-based  
25  
26  
27 612 patient-reported outcome measures. *Quality of life research : an international*  
28  
29 613 *journal of quality of life aspects of treatment, care and rehabilitation*  
30  
31 614 2015;24(8):1949-61. doi: 10.1007/s11136-015-0937-3 [published Online First:  
32  
33 615 2015/02/24]  
34  
35  
36  
37 616 43. Khanna R, Bressler B, Levesque BG, et al. Early combined immunosuppression for the  
38  
39 617 management of Crohn's disease (REACT): a cluster randomised controlled trial.  
40  
41 618 *Lancet* 2015;386(10006):1825-34. doi: 10.1016/s0140-6736(15)00068-9 [published  
42  
43 619 Online First: 2015/09/08]  
44  
45  
46  
47 620 44. Vermeire S, O'Byrne S, Keir M, et al. Etrolizumab as induction therapy for ulcerative  
48  
49 621 colitis: a randomised, controlled, phase 2 trial. *Lancet* 2014;384(9940):309-18. doi:  
50  
51 622 10.1016/s0140-6736(14)60661-9 [published Online First: 2014/05/13]  
52  
53  
54  
55 623 45. Taylor PC, Keystone EC, van der Heijde D, et al. Baricitinib versus Placebo or  
56  
57 624 Adalimumab in Rheumatoid Arthritis. *The New England journal of medicine*  
58  
59  
60

- 1  
2  
3  
4 625 2017;376(7):652-62. doi: 10.1056/NEJMoa1608345 [published Online First:  
5  
6  
7 626 2017/02/16]  
8  
9 627 46. Baeten D, Sieper J, Braun J, et al. Secukinumab, an Interleukin-17A Inhibitor, in  
10  
11 628 Ankylosing Spondylitis. *The New England journal of medicine*  
12  
13  
14 629 2015;373(26):2534-48. doi: 10.1056/NEJMoa1505066 [published Online First:  
15  
16  
17 630 2015/12/25]  
18  
19  
20 631 47. Sieper J, Rudwaleit M, Baraliakos X, et al. The Assessment of SpondyloArthritis  
21  
22 632 international Society (ASAS) handbook: a guide to assess spondyloarthritis. *Annals*  
23  
24  
25 633 *of the rheumatic diseases* 2009;68 Suppl 2:ii1-44. doi: 10.1136/ard.2008.104018  
26  
27 634 [published Online First: 2009/05/14]  
28  
29  
30 635 48. Mease PJ, McInnes IB, Kirkham B, et al. Secukinumab Inhibition of Interleukin-17A in  
31  
32 636 Patients with Psoriatic Arthritis. *The New England journal of medicine*  
33  
34  
35 637 2015;373(14):1329-39. doi: 10.1056/NEJMoa1412679 [published Online First:  
36  
37  
38 638 2015/10/01]  
39  
40  
41 639 49. Lebwohl M, Strober B, Menter A, et al. Phase 3 Studies Comparing Brodalumab with  
42  
43 640 Ustekinumab in Psoriasis. *The New England journal of medicine*  
44  
45  
46 641 2015;373(14):1318-28. doi: 10.1056/NEJMoa1503824 [published Online First:  
47  
48  
49 642 2015/10/01]  
50  
51 643 50. Kimball AB, Okun MM, Williams DA, et al. Two Phase 3 Trials of Adalimumab for  
52  
53 644 Hidradenitis Suppurativa. *The New England journal of medicine*  
54  
55  
56 645 2016;375(5):422-34. doi: 10.1056/NEJMoa1504370 [published Online First:  
57  
58  
59 646 2016/08/16]  
60

- 1  
2  
3  
4 647 51. Jaffe GJ, Dick AD, Brezin AP, et al. Adalimumab in Patients with Active Noninfectious  
5  
6 648 Uveitis. *The New England journal of medicine* 2016;375(10):932-43. doi:  
7  
8  
9 649 10.1056/NEJMoa1509852 [published Online First: 2016/09/08]  
10  
11  
12 650 52. Peyrin-Biroulet L, Sandborn W, Sands BE, et al. Selecting Therapeutic Targets in  
13  
14 651 Inflammatory Bowel Disease (STRIDE): Determining Therapeutic Goals for  
15  
16 652 Treat-to-Target. *The American journal of gastroenterology* 2015;110(9):1324-38.  
17  
18  
19 653 doi: 10.1038/ajg.2015.233 [published Online First: 2015/08/26]  
20  
21  
22 654 53. OPEN.  
23  
24 655 [http://www.sdu.dk/en/Om\\_SDU/Institutter\\_centre/Klinisk\\_institut/Forskning/Forsk](http://www.sdu.dk/en/Om_SDU/Institutter_centre/Klinisk_institut/Forskning/Forsk)  
25  
26 656 <ningsenheder/open.aspx> 2017 [accessed 20.02.2017 2017].  
27  
28  
29  
30 657 54. Drosos GI, Pozo JL. The causes and mechanisms of meniscal injuries in the sporting and  
31  
32 658 non-sporting environment in an unselected population. *The Knee* 2004;11(2):143-9.  
33  
34 659 doi: 10.1016/s0968-0160(03)00105-4 [published Online First: 2004/04/07]  
35  
36  
37  
38 660 55. Hemingway H, Croft P, Perel P, et al. Prognosis research strategy (PROGRESS) 1: a  
39  
40 661 framework for researching clinical outcomes. *BMJ (Clinical research ed)*  
41  
42 662 2013;346:e5595. doi: 10.1136/bmj.e5595 [published Online First: 2013/02/07]  
43  
44  
45  
46 663 56. Altman DG, Royston P. What do we mean by validating a prognostic model? *Stat Med*  
47  
48 664 2000;19(4):453-73. [published Online First: 2000/03/01]  
49  
50  
51 665 57. Moons KG, Altman DG, Reitsma JB, et al. Transparent Reporting of a multivariable  
52  
53 666 prediction model for Individual Prognosis or Diagnosis (TRIPOD): explanation and  
54  
55 667 elaboration. *Annals of internal medicine* 2015;162(1):W1-73. doi:  
56  
57 668 10.7326/m14-0698 [published Online First: 2015/01/07]  
58  
59  
60



- 1  
2  
3  
4 669 58. White IR, Horton NJ, Carpenter J, et al. Strategy for intention to treat analysis in  
5  
6 670 randomised trials with missing outcome data. *BMJ (Clinical research ed)*  
7  
8  
9 671 2011;342:d40. doi: 10.1136/bmj.d40 [published Online First: 2011/02/09]  
10  
11  
12 672 59. de Wit MP, Berlo SE, Aanerud GJ, et al. European League Against Rheumatism  
13  
14 673 recommendations for the inclusion of patient representatives in scientific projects.  
15  
16  
17 674 *Annals of the rheumatic diseases* 2011;70(5):722-6. doi: 10.1136/ard.2010.135129  
18  
19 675 [published Online First: 2011/01/25]  
20  
21  
22 676 60. Kappelman MD, Long MD, Martin C, et al. Evaluation of the patient-reported outcomes  
23  
24 677 measurement information system in a large cohort of patients with inflammatory  
25  
26  
27 678 bowel diseases. *Clinical gastroenterology and hepatology : the official clinical*  
28  
29 679 *practice journal of the American Gastroenterological Association*  
30  
31  
32 680 2014;12(8):1315-23.e2. doi: 10.1016/j.cgh.2013.10.019 [published Online First:  
33  
34 681 2013/11/05]  
35  
36  
37  
38 682 61. Cheung PP, de Wit M, Bingham CO, 3rd, et al. Recommendations for the Involvement of  
39  
40 683 Patient Research Partners (PRP) in OMERACT Working Groups. A Report from the  
41  
42  
43 684 OMERACT 2014 Working Group on PRP. *The Journal of rheumatology*  
44  
45  
46 685 2016;43(1):187-93. doi: 10.3899/jrheum.141011 [published Online First:  
47  
48 686 2015/04/17]  
49  
50  
51 687 62. Steyerberg EW, Moons KG, van der Windt DA, et al. Prognosis Research Strategy  
52  
53 688 (PROGRESS) 3: prognostic model research. *PLoS medicine* 2013;10(2):e1001381.  
54  
55  
56 689 doi: 10.1371/journal.pmed.1001381 [published Online First: 2013/02/09]  
57  
58  
59  
60

- 1  
2  
3  
4 690 63. Riley RD, Hayden JA, Steyerberg EW, et al. Prognosis Research Strategy (PROGRESS)  
5  
6 691 2: prognostic factor research. *PLoS medicine* 2013;10(2):e1001380. doi:  
7  
8  
9 692 10.1371/journal.pmed.1001380 [published Online First: 2013/02/09]  
10  
11  
12 693 64. Hingorani AD, Windt DA, Riley RD, et al. Prognosis research strategy (PROGRESS) 4:  
13  
14 694 stratified medicine research. *BMJ (Clinical research ed)* 2013;346:e5793. doi:  
15  
16 695 10.1136/bmj.e5793 [published Online First: 2013/02/07]  
17  
18  
19 696 65. Osler M, Linneberg A, Glumer C, et al. The cohorts at the Research Centre for Prevention  
20  
21 697 and Health, formerly 'The Glostrup Population Studies'. *International journal of*  
22  
23 698 *epidemiology* 2011;40(3):602-10. doi: 10.1093/ije/dyq041 [published Online First:  
24  
25 699 2010/03/27]  
26  
27  
28  
29  
30 700 66. Tjonneland A, Olsen A, Boll K, et al. Study design, exposure variables, and  
31  
32 701 socioeconomic determinants of participation in Diet, Cancer and Health: a  
33  
34 702 population-based prospective cohort study of 57,053 men and women in Denmark.  
35  
36 703 *ScandJPublic Health* 2007;35(4):432-41.  
37  
38  
39  
40 704 67. Armstrong AW, Harskamp CT, Dhillon JS, et al. Psoriasis and smoking: a systematic  
41  
42 705 review and meta-analysis. *The British journal of dermatology* 2014;170(2):304-14.  
43  
44 706 doi: 10.1111/bjd.12670 [published Online First: 2013/10/15]  
45  
46  
47  
48 707 68. Ibfelt EH, Jensen DV, Hetland ML. The Danish nationwide clinical register for patients  
49  
50 708 with rheumatoid arthritis: DANBIO. *Clinical epidemiology* 2016;8:737-42. doi:  
51  
52 709 10.2147/cep.s99490 [published Online First: 2016/11/09]  
53  
54  
55  
56 710 69. Gniadecki R, Kragballe K, Dam TN, et al. Comparison of drug survival rates for  
57  
58 711 adalimumab, etanercept and infliximab in patients with psoriasis vulgaris. *The British*  
59  
60

- 1  
2  
3  
4 712 *journal of dermatology* 2011;164(5):1091-6. doi: 10.1111/j.1365-2133.2011.10213.x  
5  
6  
7 713 [published Online First: 2011/01/12]  
8  
9 714 70. Koster-Rasmussen R, Siersma V, Halldorsson TI, et al. Missing portion sizes in  
10  
11 715 FFQ--alternatives to use of standard portions. *Public health nutrition*  
12 716 2015;18(11):1914-21. doi: 10.1017/s1368980014002389 [published Online First:  
13  
14 717 2014/11/11]  
15  
16  
17  
18  
19 718 71. Moore HM, Kelly AB, Jewell SD, et al. Biospecimen reporting for improved study  
20  
21 719 quality (BRISQ). *JProteomeRes* 2011;10(8):3429-38.  
22  
23  
24  
25 720 72. Betsou F, Lehmann S, Ashton G, et al. Standard preanalytical coding for biospecimens:  
26  
27 721 defining the sample PREanalytical code. *Cancer epidemiology, biomarkers &*  
28 722 *prevention : a publication of the American Association for Cancer Research,*  
29  
30 723 *cosponsored by the American Society of Preventive Oncology* 2010;19(4):1004-11.  
31  
32 724 doi: 10.1158/1055-9965.epi-09-1268 [published Online First: 2010/03/25]  
33  
34  
35  
36  
37  
38 725 73. Bek S, Nielsen JV, Bojesen AB, et al. Systematic review: genetic biomarkers associated  
39  
40 726 with anti-TNF treatment response in inflammatory bowel diseases. *Alimentary*  
41  
42 727 *pharmacology & therapeutics* 2016;44(6):554-67. doi: 10.1111/apt.13736  
43  
44  
45  
46 728 74. Armyra K, Kouris A, Markantoni V, et al. Hidradenitis suppurativa treated with  
47  
48 729 tetracycline in combination with colchicine: a prospective series of 20 patients.  
49  
50 730 *International journal of dermatology* 2017;56(3):346-50. doi: 10.1111/ijd.13428  
51  
52  
53 731 [published Online First: 2017/01/06]  
54  
55  
56  
57  
58  
59  
60

- 1  
2  
3  
4 732 75. Skoie IM, Dalen Is, Ternowitz T, et al. Fatigue in psoriasis - a controlled study. *The*  
5  
6 733 *British journal of dermatology* 2017 doi: 10.1111/bjd.15375 [published Online First:  
7  
8  
9 734 2017/02/10]
- 10  
11 735 76. Stjernman H, Granno C, Jarnerot G, et al. Short health scale: a valid, reliable, and  
12  
13  
14 736 responsive instrument for subjective health assessment in Crohn's disease.  
15  
16 737 *Inflammatory bowel diseases* 2008;14(1):47-52. doi: 10.1002/ibd.20255 [published  
17  
18  
19 738 Online First: 2007/09/11]
- 20  
21 739 77. Hjortswang H, Jarnerot G, Curman B, et al. The Short Health Scale: a valid measure of  
22  
23  
24 740 subjective health in ulcerative colitis. *Scandinavian journal of gastroenterology*  
25  
26 741 2006;41(10):1196-203. doi: 10.1080/00365520600610618 [published Online First:  
27  
28  
29 742 2006/09/23]
- 30  
31 743 78. Desai MS, Seekatz AM, Koropatkin NM, et al. A Dietary Fiber-Deprived Gut Microbiota  
32  
33  
34 744 Degrades the Colonic Mucus Barrier and Enhances Pathogen Susceptibility. *Cell*  
35  
36 745 2016;167(5):1339-53.e21. doi: 10.1016/j.cell.2016.10.043 [published Online First:  
37  
38  
39 746 2016/11/20]
- 40  
41 747 79. Png CW, Linden SK, Gilshenan KS, et al. Mucolytic bacteria with increased prevalence  
42  
43  
44 748 in IBD mucosa augment in vitro utilization of mucin by other bacteria. *The American*  
45  
46  
47 749 *journal of gastroenterology* 2010;105(11):2420-8. doi: 10.1038/ajg.2010.281  
48  
49  
50 750 [published Online First: 2010/07/22]
- 51  
52 751 80. Gibson GR, Macfarlane GT, Cummings JH. Sulphate reducing bacteria and hydrogen  
53  
54  
55 752 metabolism in the human large intestine. *Gut* 1993;34(4):437-9. [published Online  
56  
57  
58 753 First: 1993/04/01]
- 59  
60

- 1  
2  
3  
4 754 81. Windey K, De P, V, Louat T, et al. Modulation of protein fermentation does not affect  
5  
6 755 fecal water toxicity: a randomized cross-over study in healthy subjects. *PLoS ONE*  
7  
8  
9 756 2012;7(12):e52387.  
10  
11  
12 757 82. Yao CK, Muir JG, Gibson PR. Review article: insights into colonic protein fermentation,  
13  
14 758 its modulation and potential health implications. *Alimentary pharmacology &*  
15  
16 759 *therapeutics* 2016;43(2):181-96. doi: 10.1111/apt.13456 [published Online First:  
17  
18 760 2015/11/04]  
19  
20  
21  
22 761 83. Ijssennagger N, van der Meer R, van Mil SW. Sulfide as a Mucus Barrier-Breaker in  
23  
24 762 Inflammatory Bowel Disease? *Trends Mol Med* 2016;22(3):190-9. doi:  
25  
26 763 10.1016/j.molmed.2016.01.002 [published Online First: 2016/02/08]  
27  
28  
29  
30 764 84. Maloy KJ, Powrie F. Intestinal homeostasis and its breakdown in inflammatory bowel  
31  
32 765 disease. *Nature* 2011;474(7351):298-306. doi: 10.1038/nature10208  
33  
34  
35 766 85. Cui J, Chen Y, Wang HY, et al. Mechanisms and pathways of innate immune activation  
36  
37 767 and regulation in health and cancer. *Human vaccines & immunotherapeutics*  
38  
39 768 2014;10(11):3270-85. doi: 10.4161/21645515.2014.979640 [published Online First:  
40  
41 769 2015/01/28]  
42  
43  
44  
45 770 86. Jia W, Whitehead RN, Griffiths L, et al. Diversity and distribution of sulphate-reducing  
46  
47 771 bacteria in human faeces from healthy subjects and patients with inflammatory bowel  
48  
49 772 disease. *FEMS ImmunolMedMicrobiol* 2012;65(1):55-68.  
50  
51  
52  
53 773 87. Sundstrom B, Johansson I, Rantapaa-Dahlqvist S. Diet and alcohol as risk factors for  
54  
55 774 rheumatoid arthritis: a nested case-control study. *Rheumatology international*  
56  
57  
58  
59  
60

- 1  
2  
3  
4 775 2015;35(3):533-9. doi: 10.1007/s00296-014-3185-x [published Online First:  
5  
6  
7 776 2014/11/28]
- 8  
9 777 88. Jowett SL, Seal CJ, Pearce MS, et al. Influence of dietary factors on the clinical course of  
10  
11 778 ulcerative colitis: a prospective cohort study. *Gut* 2004;53(10):1479-84. doi:  
12  
13 779 10.1136/gut.2003.024828
- 14  
15  
16  
17 780 89. Kelly KR, Haus JM, Solomon TP, et al. A low-glycemic index diet and exercise  
18  
19 781 intervention reduces TNF(alpha) in isolated mononuclear cells of older, obese adults.  
20  
21 782 *The Journal of nutrition* 2011;141(6):1089-94. doi: 10.3945/jn.111.139964  
22  
23 783 [published Online First: 2011/04/29]
- 24  
25  
26  
27 784 90. Merga Y, Campbell BJ, Rhodes JM. Mucosal barrier, bacteria and inflammatory bowel  
28  
29 785 disease: possibilities for therapy. *Digestive diseases (Basel, Switzerland)*  
30  
31 786 2014;32(4):475-83. doi: 10.1159/000358156 [published Online First: 2014/06/28]
- 32  
33  
34  
35 787 91. Hedrick VE, Dietrich AM, Estabrooks PA, et al. Dietary biomarkers: advances,  
36  
37 788 limitations and future directions. *Nutrition journal* 2012;11:109. doi:  
38  
39 789 10.1186/1475-2891-11-109 [published Online First: 2012/12/15]
- 40  
41  
42  
43 790 92. Corella D, Ordovas JM. Biomarkers: background, classification and guidelines for  
44  
45 791 applications in nutritional epidemiology. *Nutricion hospitalaria* 2015;31 Suppl  
46  
47 792 3:177-88. doi: 10.3305/nh.2015.31.sup3.8765 [published Online First: 2015/02/27]
- 48  
49  
50  
51 793 93. Holen T, Norheim F, Gundersen TE, et al. Biomarkers for nutrient intake with focus on  
52  
53 794 alternative sampling techniques. *Genes & nutrition* 2016;11:12. doi:  
54  
55 795 10.1186/s12263-016-0527-1 [published Online First: 2016/08/24]
- 56  
57  
58  
59  
60

- 1  
2  
3  
4 796 94. Zhang Y, Schottker B, Florath I, et al. Smoking-Associated DNA Methylation  
5  
6 797 Biomarkers and Their Predictive Value for All-Cause and Cardiovascular Mortality.  
7  
8  
9 798 *Environmental health perspectives* 2016;124(1):67-74. doi: 10.1289/ehp.1409020  
10  
11 799 [published Online First: 2015/05/29]  
12  
13  
14 800 95. Garneau V, Rudkowska I, Paradis AM, et al. Omega-3 fatty acids status in human  
15  
16 801 subjects estimated using a food frequency questionnaire and plasma phospholipids  
17  
18 802 levels. *Nutrition journal* 2012;11:46. doi: 10.1186/1475-2891-11-46 [published  
19  
20 803 Online First: 2012/07/11]  
21  
22  
23  
24 804 96. Warensjo Lemming E, Nalsen C, Becker W, et al. Relative validation of the dietary  
25  
26 805 intake of fatty acids among adults in the Swedish National Dietary Survey using  
27  
28 806 plasma phospholipid fatty acid composition. *Journal of nutritional science*  
29  
30 807 2015;4:e25. doi: 10.1017/jns.2015.1 [published Online First: 2015/10/27]  
31  
32  
33  
34 808 97. Wallingford SC, Pilkington SM, Massey KA, et al. Three-way assessment of long-chain  
35  
36 809 n-3 PUFA nutrition: by questionnaire and matched blood and skin samples. *The*  
37  
38 810 *British journal of nutrition* 2013;109(4):701-8. doi: 10.1017/s0007114512001997  
39  
40 811 [published Online First: 2012/05/24]  
41  
42  
43  
44 812 98. Dragsted LO. Biomarkers of meat intake and the application of nutrigenomics. *Meat*  
45  
46 813 *science* 2010;84(2):301-7. doi: 10.1016/j.meatsci.2009.08.028 [published Online  
47  
48 814 First: 2010/04/09]  
49  
50  
51  
52 815 99. Riserus U, Marklund M. Milk fat biomarkers and cardiometabolic disease. *Current*  
53  
54 816 *opinion in lipidology* 2017;28(1):46-51. doi: 10.1097/mol.0000000000000381  
55  
56 817 [published Online First: 2016/12/03]  
57  
58  
59  
60

- 1  
2  
3  
4 818 100. Johnsen NF, Hausner H, Olsen A, et al. Intake of whole grains and vegetables  
5  
6 819 determines the plasma enterolactone concentration of Danish women. *JNutr*  
7  
8  
9 820 2004;134(10):2691-97.  
10  
11 821 101. Norskov NP, Kyro C, Olsen A, et al. High-Throughput LC-MS/MS Method for Direct  
12  
13 822 Quantification of Glucuronidated, Sulfated, and Free Enterolactone in Human  
14  
15 823 Plasma. *Journal of proteome research* 2016;15(3):1051-8. doi:  
16  
17 824 10.1021/acs.jproteome.5b01117 [published Online First: 2016/01/27]  
18  
19  
20  
21  
22 825 102. Moreno ML, Cebolla A, Munoz-Suano A, et al. Detection of gluten immunogenic  
23  
24 826 peptides in the urine of patients with coeliac disease reveals transgressions in the  
25  
26 827 gluten-free diet and incomplete mucosal healing. *Gut* 2017;66(2):250-57. doi:  
27  
28 828 10.1136/gutjnl-2015-310148 [published Online First: 2015/11/27]  
29  
30  
31  
32 829 103. Zamora-Ros R, Touillaud M, Rothwell JA, et al. Measuring exposure to the polyphenol  
33  
34 830 metabolome in observational epidemiologic studies: current tools and applications  
35  
36 831 and their limits. *The American journal of clinical nutrition* 2014;100(1):11-26. doi:  
37  
38 832 10.3945/ajcn.113.077743 [published Online First: 2014/05/03]  
39  
40  
41  
42 833 104. Krogholm KS, Bredsdorff L, Alinia S, et al. Free fruit at workplace intervention  
43  
44 834 increases total fruit intake: a validation study using 24 h dietary recall and urinary  
45  
46 835 flavonoid excretion. *European journal of clinical nutrition* 2010;64(10):1222-8. doi:  
47  
48 836 10.1038/ejcn.2010.130 [published Online First: 2010/08/05]  
49  
50  
51  
52 837 105. Linseisen J, Rohrmann S. Biomarkers of dietary intake of flavonoids and phenolic acids  
53  
54 838 for studying diet-cancer relationship in humans. *European journal of nutrition*  
55  
56  
57  
58  
59  
60



- 1  
2  
3  
4 839 2008;47 Suppl 2:60-8. doi: 10.1007/s00394-008-2007-x [published Online First:  
5  
6 840 2008/06/17]  
7  
8  
9 841 106. Brantsaeter AL, Haugen M, Rasmussen SE, et al. Urine flavonoids and plasma  
10  
11 842 carotenoids in the validation of fruit, vegetable and tea intake during pregnancy in the  
12  
13  
14 843 Norwegian Mother and Child Cohort Study (MoBa). *Public health nutrition*  
15  
16  
17 844 2007;10(8):838-47. doi: 10.1017/s1368980007339037 [published Online First:  
18  
19 845 2007/05/12]  
20  
21  
22 846 107. Neale EP, Batterham MJ, Tapsell LC. Consumption of a healthy dietary pattern results  
23  
24  
25 847 in significant reductions in C-reactive protein levels in adults: a meta-analysis.  
26  
27 848 *Nutrition research (New York, NY)* 2016;36(5):391-401. doi:  
28  
29 849 10.1016/j.nutres.2016.02.009 [published Online First: 2016/04/23]  
30  
31  
32 850 108. Stedile N, Canuto R, Col CD, et al. Dietary total antioxidant capacity is associated with  
33  
34  
35 851 plasmatic antioxidant capacity, nutrient intake and lipid and DNA damage in healthy  
36  
37  
38 852 women. *International journal of food sciences and nutrition* 2016;67(4):479-88. doi:  
39  
40 853 10.3109/09637486.2016.1164670 [published Online First: 2016/03/29]  
41  
42  
43 854 109. Shah RV, Murthy VL, Allison MA, et al. Diet and adipose tissue distributions: The  
44  
45  
46 855 Multi-Ethnic Study of Atherosclerosis. *Nutrition, metabolism, and cardiovascular*  
47  
48 856 *diseases : NMCD* 2016;26(3):185-93. doi: 10.1016/j.numecd.2015.12.012 [published  
49  
50  
51 857 Online First: 2016/02/24]  
52  
53  
54 858 110. Sotos-Prieto M, Bhupathiraju SN, Falcon LM, et al. Association between a Healthy  
55  
56 859 Lifestyle Score and inflammatory markers among Puerto Rican adults. *Nutrition,*  
57  
58  
59  
60

- 1  
2  
3  
4 860 *metabolism, and cardiovascular diseases : NMCD* 2016;26(3):178-84. doi:  
5  
6  
7 861 10.1016/j.numecd.2015.12.004 [published Online First: 2016/02/04]  
8  
9 862 111. Ko BJ, Park KH, Shin S, et al. Diet quality and diet patterns in relation to circulating  
10  
11 863 cardiometabolic biomarkers. *Clinical nutrition (Edinburgh, Scotland)*  
12  
13 864 2016;35(2):484-90. doi: 10.1016/j.clnu.2015.03.022 [published Online First:  
14  
15 865 2015/04/29]  
16  
17  
18  
19 866 112. Marques-Rocha JL, Milagro FI, Mansego ML, et al. LINE-1 methylation is positively  
20  
21 867 associated with healthier lifestyle but inversely related to body fat mass in healthy  
22  
23 868 young individuals. *Epigenetics* 2016;11(1):49-60. doi:  
24  
25 869 10.1080/15592294.2015.1135286 [published Online First: 2016/01/21]  
26  
27  
28  
29 870 113. Umoh FI, Kato I, Ren J, et al. Markers of systemic exposures to products of intestinal  
30  
31 871 bacteria in a dietary intervention study. *European journal of nutrition*  
32  
33 872 2016;55(2):793-8. doi: 10.1007/s00394-015-0900-7 [published Online First:  
34  
35 873 2015/04/24]  
36  
37  
38  
39 874 114. Loprinzi PD, Lee IM, Andersen RE, et al. Association of Concurrent Healthy Eating and  
40  
41 875 Regular Physical Activity With Cardiovascular Disease Risk Factors in U.S. Youth.  
42  
43 876 *American journal of health promotion : AJHP* 2015;30(1):2-8. doi:  
44  
45 877 10.4278/ajhp.140213-QUAN-71 [published Online First: 2014/11/06]  
46  
47  
48  
49 878 115. Yu E, Rimm E, Qi L, et al. Diet, Lifestyle, Biomarkers, Genetic Factors, and Risk of  
50  
51 879 Cardiovascular Disease in the Nurses' Health Studies. *American journal of public*  
52  
53 880 *health* 2016;106(9):1616-23. doi: 10.2105/ajph.2016.303316 [published Online  
54  
55 881 First: 2016/07/28]  
56  
57  
58  
59  
60

- 1  
2  
3  
4 882 116. Satija A, Bhupathiraju SN, Rimm EB, et al. Plant-Based Dietary Patterns and Incidence  
5  
6 883 of Type 2 Diabetes in US Men and Women: Results from Three Prospective Cohort  
7  
8  
9 884 Studies. *PLoS medicine* 2016;13(6):e1002039. doi: 10.1371/journal.pmed.1002039  
10  
11 885 [published Online First: 2016/06/15]  
12  
13  
14 886 117. Ardisson Korat AV, Willett WC, Hu FB. Diet, lifestyle, and genetic risk factors for type  
15  
16  
17 887 2 diabetes: a review from the Nurses' Health Study, Nurses' Health Study 2, and  
18  
19 888 Health Professionals' Follow-up Study. *Current nutrition reports* 2014;3(4):345-54.  
20  
21 889 doi: 10.1007/s13668-014-0103-5 [published Online First: 2015/01/20]  
22  
23  
24 890 118. Nettleton JA, Steffen LM, Palmas W, et al. Associations between microalbuminuria and  
25  
26  
27 891 animal foods, plant foods, and dietary patterns in the Multiethnic Study of  
28  
29 892 Atherosclerosis. *The American journal of clinical nutrition* 2008;87(6):1825-36.  
30  
31 893 [published Online First: 2008/06/11]  
32  
33  
34  
35  
36 894

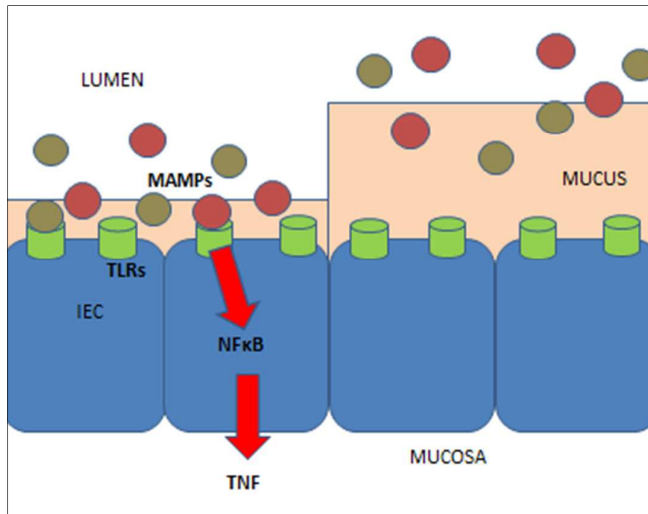

peer review only

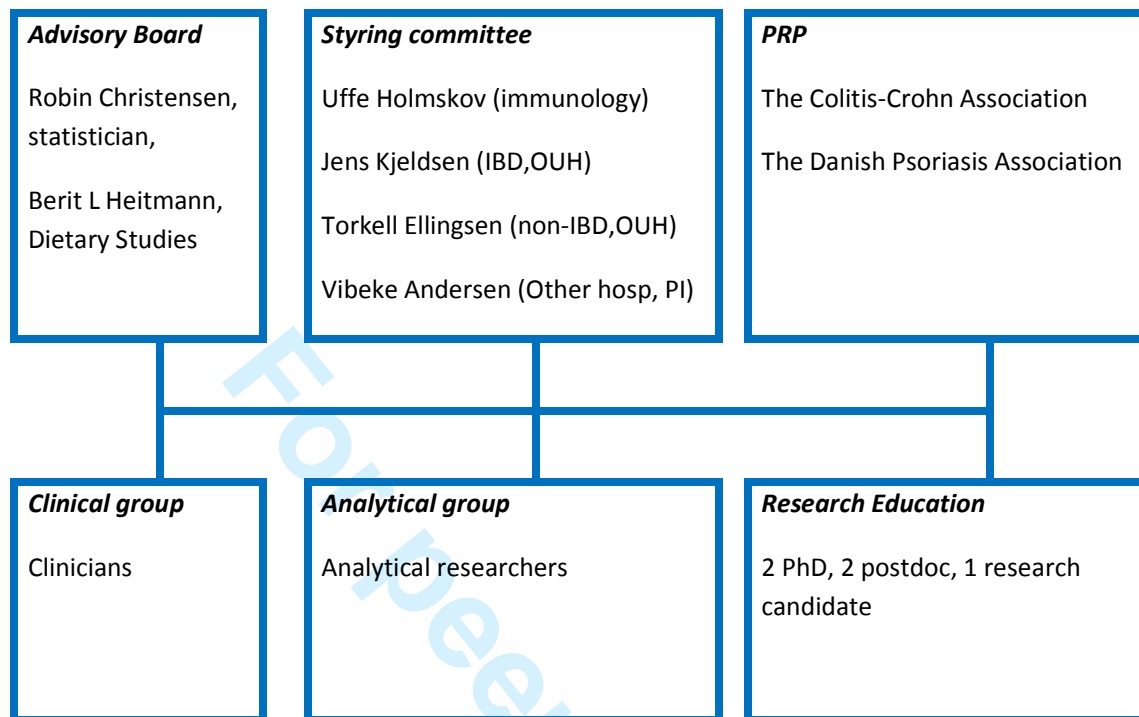

29  
30  
31  
32  
33  
34  
35  
36  
37  
38  
39  
40  
41  
42  
43  
44  
45  
46  
47  
48  
49  
50  
51  
52  
53  
54  
55  
56  
57  
58  
59  
60

Areas of responsibility in parenthesis. **IBD-OUH**, sampling of IBD patients from Odense University Hospital (OUH); **non-IBD, OUH**, sampling of non-IBD patients from OUH; Other hosp, sampling of patients from other hospitals; PI, principal investigator

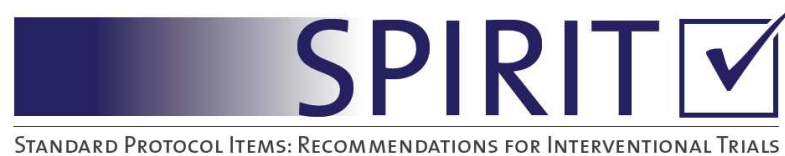

SPIRIT 2013 Checklist: Recommended items to address in a clinical trial protocol and related documents\*

| Section/item                      | Item No | Description                                                                                                                                                                                                                                                                              | Addressed on page number |
|-----------------------------------|---------|------------------------------------------------------------------------------------------------------------------------------------------------------------------------------------------------------------------------------------------------------------------------------------------|--------------------------|
| <b>Administrative information</b> |         |                                                                                                                                                                                                                                                                                          |                          |
| Title                             | 1       | Descriptive title identifying the study design, population, interventions, and, if applicable, trial acronym                                                                                                                                                                             | ___1___                  |
| Trial registration                | 2a      | Trial identifier and registry name. If not yet registered, name of intended registry                                                                                                                                                                                                     | ___1___                  |
|                                   | 2b      | All items from the World Health Organization Trial Registration Data Set                                                                                                                                                                                                                 | _____                    |
| Protocol version                  | 3       | Date and version identifier                                                                                                                                                                                                                                                              | __suppl___               |
| Funding                           | 4       | Sources and types of financial, material, and other support                                                                                                                                                                                                                              | __14___                  |
| Roles and responsibilities        | 5a      | Names, affiliations, and roles of protocol contributors                                                                                                                                                                                                                                  | 2 and 14___              |
|                                   | 5b      | Name and contact information for the trial sponsor                                                                                                                                                                                                                                       | __2___                   |
|                                   | 5c      | Role of study sponsor and funders, if any, in study design; collection, management, analysis, and interpretation of data; writing of the report; and the decision to submit the report for publication, including whether they will have ultimate authority over any of these activities | __7-14___                |
|                                   | 5d      | Composition, roles, and responsibilities of the coordinating centre, steering committee, endpoint adjudication committee, data management team, and other individuals or groups overseeing the trial, if applicable (see Item 21a for data monitoring committee)                         | __7, 11- 14              |

1  
2  
3  
4  
5  
6  
7  
8  
9  
10  
11  
12  
13  
14  
15  
16  
17  
18  
19  
20  
21  
22  
23  
24  
25  
26  
27  
28  
29  
30  
31  
32  
33  
34  
35  
36  
37  
38  
39  
40  
41  
42  
43  
44  
45  
46  
47  
48  
49**Introduction**

|                          |    |                                                                                                                                                                                                           |              |
|--------------------------|----|-----------------------------------------------------------------------------------------------------------------------------------------------------------------------------------------------------------|--------------|
| Background and rationale | 6a | Description of research question and justification for undertaking the trial, including summary of relevant studies (published and unpublished) examining benefits and harms for each intervention        | __Figure 1__ |
|                          | 6b | Explanation for choice of comparators                                                                                                                                                                     | __8__        |
| Objectives               | 7  | Specific objectives or hypotheses                                                                                                                                                                         | __6__        |
| Trial design             | 8  | Description of trial design including type of trial (eg, parallel group, crossover, factorial, single group), allocation ratio, and framework (eg, superiority, equivalence, noninferiority, exploratory) | __7__        |

**Methods: Participants, interventions, and outcomes**

|                      |     |                                                                                                                                                                                                                                                                                                                                                                                |          |
|----------------------|-----|--------------------------------------------------------------------------------------------------------------------------------------------------------------------------------------------------------------------------------------------------------------------------------------------------------------------------------------------------------------------------------|----------|
| Study setting        | 9   | Description of study settings (eg, community clinic, academic hospital) and list of countries where data will be collected. Reference to where list of study sites can be obtained                                                                                                                                                                                             | __7__    |
| Eligibility criteria | 10  | Inclusion and exclusion criteria for participants. If applicable, eligibility criteria for study centres and individuals who will perform the interventions (eg, surgeons, psychotherapists)                                                                                                                                                                                   | __7__    |
| Interventions        | 11a | Interventions for each group with sufficient detail to allow replication, including how and when they will be administered                                                                                                                                                                                                                                                     | __7__    |
|                      | 11b | Criteria for discontinuing or modifying allocated interventions for a given trial participant (eg, drug dose change in response to harms, participant request, or improving/worsening disease)                                                                                                                                                                                 | __NA__   |
|                      | 11c | Strategies to improve adherence to intervention protocols, and any procedures for monitoring adherence (eg, drug tablet return, laboratory tests)                                                                                                                                                                                                                              | __NA__   |
|                      | 11d | Relevant concomitant care and interventions that are permitted or prohibited during the trial                                                                                                                                                                                                                                                                                  | __NA__   |
| Outcomes             | 12  | Primary, secondary, and other outcomes, including the specific measurement variable (eg, systolic blood pressure), analysis metric (eg, change from baseline, final value, time to event), method of aggregation (eg, median, proportion), and time point for each outcome. Explanation of the clinical relevance of chosen efficacy and harm outcomes is strongly recommended | __8-10__ |
| Participant timeline | 13  | Time schedule of enrolment, interventions (including any run-ins and washouts), assessments, and visits for participants. A schematic diagram is highly recommended (see Figure)                                                                                                                                                                                               | __7__    |

|   |             |    |                                                                                                                                                                                       |        |
|---|-------------|----|---------------------------------------------------------------------------------------------------------------------------------------------------------------------------------------|--------|
| 1 |             |    |                                                                                                                                                                                       |        |
| 2 |             |    |                                                                                                                                                                                       |        |
| 3 | Sample size | 14 | Estimated number of participants needed to achieve study objectives and how it was determined, including clinical and statistical assumptions supporting any sample size calculations | __12__ |
| 4 |             |    |                                                                                                                                                                                       |        |
| 5 |             |    |                                                                                                                                                                                       |        |
| 6 | Recruitment | 15 | Strategies for achieving adequate participant enrolment to reach target sample size                                                                                                   | __7__  |
| 7 |             |    |                                                                                                                                                                                       |        |

### 8 **Methods: Assignment of interventions (for controlled trials)**

#### 9 Allocation:

|    |                                  |     |                                                                                                                                                                                                                                                                                                                                                          |        |
|----|----------------------------------|-----|----------------------------------------------------------------------------------------------------------------------------------------------------------------------------------------------------------------------------------------------------------------------------------------------------------------------------------------------------------|--------|
| 10 |                                  |     |                                                                                                                                                                                                                                                                                                                                                          |        |
| 11 |                                  |     |                                                                                                                                                                                                                                                                                                                                                          |        |
| 12 | Sequence generation              | 16a | Method of generating the allocation sequence (eg, computer-generated random numbers), and list of any factors for stratification. To reduce predictability of a random sequence, details of any planned restriction (eg, blocking) should be provided in a separate document that is unavailable to those who enrol participants or assign interventions | __NA__ |
| 13 |                                  |     |                                                                                                                                                                                                                                                                                                                                                          |        |
| 14 |                                  |     |                                                                                                                                                                                                                                                                                                                                                          |        |
| 15 |                                  |     |                                                                                                                                                                                                                                                                                                                                                          |        |
| 16 |                                  |     |                                                                                                                                                                                                                                                                                                                                                          |        |
| 17 |                                  |     |                                                                                                                                                                                                                                                                                                                                                          |        |
| 18 | Allocation concealment mechanism | 16b | Mechanism of implementing the allocation sequence (eg, central telephone; sequentially numbered, opaque, sealed envelopes), describing any steps to conceal the sequence until interventions are assigned                                                                                                                                                | __NA__ |
| 19 |                                  |     |                                                                                                                                                                                                                                                                                                                                                          |        |
| 20 |                                  |     |                                                                                                                                                                                                                                                                                                                                                          |        |
| 21 |                                  |     |                                                                                                                                                                                                                                                                                                                                                          |        |
| 22 | Implementation                   | 16c | Who will generate the allocation sequence, who will enrol participants, and who will assign participants to interventions                                                                                                                                                                                                                                | __NA__ |
| 23 |                                  |     |                                                                                                                                                                                                                                                                                                                                                          |        |
| 24 |                                  |     |                                                                                                                                                                                                                                                                                                                                                          |        |
| 25 | Blinding (masking)               | 17a | Who will be blinded after assignment to interventions (eg, trial participants, care providers, outcome assessors, data analysts), and how                                                                                                                                                                                                                | __7__  |
| 26 |                                  |     |                                                                                                                                                                                                                                                                                                                                                          |        |
| 27 |                                  |     |                                                                                                                                                                                                                                                                                                                                                          |        |
| 28 |                                  | 17b | If blinded, circumstances under which unblinding is permissible, and procedure for revealing a participant's allocated intervention during the trial                                                                                                                                                                                                     | __NA__ |
| 29 |                                  |     |                                                                                                                                                                                                                                                                                                                                                          |        |
| 30 |                                  |     |                                                                                                                                                                                                                                                                                                                                                          |        |
| 31 |                                  |     |                                                                                                                                                                                                                                                                                                                                                          |        |

### 32 **Methods: Data collection, management, and analysis**

|    |                         |     |                                                                                                                                                                                                                                                                                                                                                                                                              |        |
|----|-------------------------|-----|--------------------------------------------------------------------------------------------------------------------------------------------------------------------------------------------------------------------------------------------------------------------------------------------------------------------------------------------------------------------------------------------------------------|--------|
| 33 |                         |     |                                                                                                                                                                                                                                                                                                                                                                                                              |        |
| 34 | Data collection methods | 18a | Plans for assessment and collection of outcome, baseline, and other trial data, including any related processes to promote data quality (eg, duplicate measurements, training of assessors) and a description of study instruments (eg, questionnaires, laboratory tests) along with their reliability and validity, if known. Reference to where data collection forms can be found, if not in the protocol | __19__ |
| 35 |                         |     |                                                                                                                                                                                                                                                                                                                                                                                                              |        |
| 36 |                         |     |                                                                                                                                                                                                                                                                                                                                                                                                              |        |
| 37 |                         |     |                                                                                                                                                                                                                                                                                                                                                                                                              |        |
| 38 |                         |     |                                                                                                                                                                                                                                                                                                                                                                                                              |        |
| 39 |                         | 18b | Plans to promote participant retention and complete follow-up, including list of any outcome data to be collected for participants who discontinue or deviate from intervention protocols                                                                                                                                                                                                                    | __19__ |
| 40 |                         |     |                                                                                                                                                                                                                                                                                                                                                                                                              |        |
| 41 |                         |     |                                                                                                                                                                                                                                                                                                                                                                                                              |        |
| 42 |                         |     |                                                                                                                                                                                                                                                                                                                                                                                                              |        |
| 43 |                         |     |                                                                                                                                                                                                                                                                                                                                                                                                              |        |
| 44 |                         |     |                                                                                                                                                                                                                                                                                                                                                                                                              |        |
| 45 |                         |     |                                                                                                                                                                                                                                                                                                                                                                                                              |        |



1  
2  
3  
4  
5  
6  
7  
8  
9  
10  
11  
12  
13  
14  
15  
16  
17  
18  
19  
20  
21  
22  
23  
24  
25  
26  
27  
28  
29  
30  
31  
32  
33  
34  
35  
36  
37  
38  
39  
40  
41  
42  
43  
44  
45  
46  
47  
48  
49

|                     |     |                                                                                                                                                                                                                                                                   |          |
|---------------------|-----|-------------------------------------------------------------------------------------------------------------------------------------------------------------------------------------------------------------------------------------------------------------------|----------|
| Data management     | 19  | Plans for data entry, coding, security, and storage, including any related processes to promote data quality (eg, double data entry; range checks for data values). Reference to where details of data management procedures can be found, if not in the protocol | ___19___ |
| Statistical methods | 20a | Statistical methods for analysing primary and secondary outcomes. Reference to where other details of the statistical analysis plan can be found, if not in the protocol                                                                                          | ___12___ |
|                     | 20b | Methods for any additional analyses (eg, subgroup and adjusted analyses)                                                                                                                                                                                          | ___12___ |
|                     | 20c | Definition of analysis population relating to protocol non-adherence (eg, as randomised analysis), and any statistical methods to handle missing data (eg, multiple imputation)                                                                                   | ___12___ |

**Methods: Monitoring**

|                 |     |                                                                                                                                                                                                                                                                                                                                       |          |
|-----------------|-----|---------------------------------------------------------------------------------------------------------------------------------------------------------------------------------------------------------------------------------------------------------------------------------------------------------------------------------------|----------|
| Data monitoring | 21a | Composition of data monitoring committee (DMC); summary of its role and reporting structure; statement of whether it is independent from the sponsor and competing interests; and reference to where further details about its charter can be found, if not in the protocol. Alternatively, an explanation of why a DMC is not needed | ___NA___ |
|                 | 21b | Description of any interim analyses and stopping guidelines, including who will have access to these interim results and make the final decision to terminate the trial                                                                                                                                                               | ___NA___ |
| Harms           | 22  | Plans for collecting, assessing, reporting, and managing solicited and spontaneously reported adverse events and other unintended effects of trial interventions or trial conduct                                                                                                                                                     | ___19___ |
| Auditing        | 23  | Frequency and procedures for auditing trial conduct, if any, and whether the process will be independent from investigators and the sponsor                                                                                                                                                                                           | ___NA___ |

**Ethics and dissemination**

|                          |    |                                                                                                                                                                                                                                  |          |
|--------------------------|----|----------------------------------------------------------------------------------------------------------------------------------------------------------------------------------------------------------------------------------|----------|
| Research ethics approval | 24 | Plans for seeking research ethics committee/institutional review board (REC/IRB) approval                                                                                                                                        | ___14___ |
| Protocol amendments      | 25 | Plans for communicating important protocol modifications (eg, changes to eligibility criteria, outcomes, analyses) to relevant parties (eg, investigators, REC/IRBs, trial participants, trial registries, journals, regulators) | ___13___ |

|    |                               |     |                                                                                                                                                                                                                                                                                     |           |
|----|-------------------------------|-----|-------------------------------------------------------------------------------------------------------------------------------------------------------------------------------------------------------------------------------------------------------------------------------------|-----------|
| 1  |                               |     |                                                                                                                                                                                                                                                                                     |           |
| 2  |                               |     |                                                                                                                                                                                                                                                                                     |           |
| 3  | Consent or assent             | 26a | Who will obtain informed consent or assent from potential trial participants or authorised surrogates, and how (see Item 32)                                                                                                                                                        | ___7___   |
| 4  |                               |     |                                                                                                                                                                                                                                                                                     |           |
| 5  |                               |     |                                                                                                                                                                                                                                                                                     |           |
| 6  |                               | 26b | Additional consent provisions for collection and use of participant data and biological specimens in ancillary studies, if applicable                                                                                                                                               | ___NA___  |
| 7  |                               |     |                                                                                                                                                                                                                                                                                     |           |
| 8  |                               |     |                                                                                                                                                                                                                                                                                     |           |
| 9  | Confidentiality               | 27  | How personal information about potential and enrolled participants will be collected, shared, and maintained in order to protect confidentiality before, during, and after the trial                                                                                                | ___8___   |
| 10 |                               |     |                                                                                                                                                                                                                                                                                     |           |
| 11 |                               |     |                                                                                                                                                                                                                                                                                     |           |
| 12 | Declaration of interests      | 28  | Financial and other competing interests for principal investigators for the overall trial and each study site                                                                                                                                                                       | ___14___  |
| 13 |                               |     |                                                                                                                                                                                                                                                                                     |           |
| 14 |                               |     |                                                                                                                                                                                                                                                                                     |           |
| 15 | Access to data                | 29  | Statement of who will have access to the final trial dataset, and disclosure of contractual agreements that limit such access for investigators                                                                                                                                     | ___NA___  |
| 16 |                               |     |                                                                                                                                                                                                                                                                                     |           |
| 17 |                               |     |                                                                                                                                                                                                                                                                                     |           |
| 18 | Ancillary and post-trial care | 30  | Provisions, if any, for ancillary and post-trial care, and for compensation to those who suffer harm from trial participation                                                                                                                                                       | ___NA___  |
| 19 |                               |     |                                                                                                                                                                                                                                                                                     |           |
| 20 |                               |     |                                                                                                                                                                                                                                                                                     |           |
| 21 | Dissemination policy          | 31a | Plans for investigators and sponsor to communicate trial results to participants, healthcare professionals, the public, and other relevant groups (eg, via publication, reporting in results databases, or other data sharing arrangements), including any publication restrictions | ___13___  |
| 22 |                               |     |                                                                                                                                                                                                                                                                                     |           |
| 23 |                               |     |                                                                                                                                                                                                                                                                                     |           |
| 24 |                               |     |                                                                                                                                                                                                                                                                                     |           |
| 25 |                               |     |                                                                                                                                                                                                                                                                                     |           |
| 26 |                               | 31b | Authorship eligibility guidelines and any intended use of professional writers                                                                                                                                                                                                      | ___NA___  |
| 27 |                               |     |                                                                                                                                                                                                                                                                                     |           |
| 28 |                               | 31c | Plans, if any, for granting public access to the full protocol, participant-level dataset, and statistical code                                                                                                                                                                     | ___NA___  |
| 29 |                               |     |                                                                                                                                                                                                                                                                                     |           |
| 30 | <b>Appendices</b>             |     |                                                                                                                                                                                                                                                                                     |           |
| 31 |                               |     |                                                                                                                                                                                                                                                                                     |           |
| 32 | Informed consent materials    | 32  | Model consent form and other related documentation given to participants and authorised surrogates                                                                                                                                                                                  | __suppl__ |
| 33 |                               |     |                                                                                                                                                                                                                                                                                     |           |
| 34 |                               |     |                                                                                                                                                                                                                                                                                     |           |
| 35 | Biological specimens          | 33  | Plans for collection, laboratory evaluation, and storage of biological specimens for genetic or molecular analysis in the current trial and for future use in ancillary studies, if applicable                                                                                      | ___19___  |
| 36 |                               |     |                                                                                                                                                                                                                                                                                     |           |
| 37 |                               |     |                                                                                                                                                                                                                                                                                     |           |

38 \*It is strongly recommended that this checklist be read in conjunction with the SPIRIT 2013 Explanation & Elaboration for important clarification on the items.  
 39 Amendments to the protocol should be tracked and dated. The SPIRIT checklist is copyrighted by the SPIRIT Group under the Creative Commons  
 40 "[Attribution-NonCommercial-NoDerivs 3.0 Unported](https://creativecommons.org/licenses/by-nc-nd/3.0/)" license.  
 41

# BMJ Open

**Impact of red and processed meat and fibre intake on  
treatment outcomes among patients with chronic  
inflammatory diseases:  
Protocol for a prospective cohort study of prognostic factors  
and personalised medicine**

|                               |                                                                                                                                                                                                                                                                                                                                                                                                                                                                                                                                                                                                                                                                                                                                                                                                                                                                                                                                                                                                                                                                                                                                                                                                                                                                                                                                                                                                                                                                                                                                                                                                                                                                                                                                                                                                                                                                                                                                                                                                                                                                |
|-------------------------------|----------------------------------------------------------------------------------------------------------------------------------------------------------------------------------------------------------------------------------------------------------------------------------------------------------------------------------------------------------------------------------------------------------------------------------------------------------------------------------------------------------------------------------------------------------------------------------------------------------------------------------------------------------------------------------------------------------------------------------------------------------------------------------------------------------------------------------------------------------------------------------------------------------------------------------------------------------------------------------------------------------------------------------------------------------------------------------------------------------------------------------------------------------------------------------------------------------------------------------------------------------------------------------------------------------------------------------------------------------------------------------------------------------------------------------------------------------------------------------------------------------------------------------------------------------------------------------------------------------------------------------------------------------------------------------------------------------------------------------------------------------------------------------------------------------------------------------------------------------------------------------------------------------------------------------------------------------------------------------------------------------------------------------------------------------------|
| Journal:                      | <i>BMJ Open</i>                                                                                                                                                                                                                                                                                                                                                                                                                                                                                                                                                                                                                                                                                                                                                                                                                                                                                                                                                                                                                                                                                                                                                                                                                                                                                                                                                                                                                                                                                                                                                                                                                                                                                                                                                                                                                                                                                                                                                                                                                                                |
| Manuscript ID                 | bmjopen-2017-018166.R1                                                                                                                                                                                                                                                                                                                                                                                                                                                                                                                                                                                                                                                                                                                                                                                                                                                                                                                                                                                                                                                                                                                                                                                                                                                                                                                                                                                                                                                                                                                                                                                                                                                                                                                                                                                                                                                                                                                                                                                                                                         |
| Article Type:                 | Protocol                                                                                                                                                                                                                                                                                                                                                                                                                                                                                                                                                                                                                                                                                                                                                                                                                                                                                                                                                                                                                                                                                                                                                                                                                                                                                                                                                                                                                                                                                                                                                                                                                                                                                                                                                                                                                                                                                                                                                                                                                                                       |
| Date Submitted by the Author: | 29-Aug-2017                                                                                                                                                                                                                                                                                                                                                                                                                                                                                                                                                                                                                                                                                                                                                                                                                                                                                                                                                                                                                                                                                                                                                                                                                                                                                                                                                                                                                                                                                                                                                                                                                                                                                                                                                                                                                                                                                                                                                                                                                                                    |
| Complete List of Authors:     | <p>Christensen, Robin; Frederiksberg and Bispebjerg Hospital, Parker Institute<br/>Heitmann, Berit; Institute of Preventive Medicine, Research Unit for dietary<br/>studies<br/>Andersen, Karina; Hospital of Southern Jutland, Focused research unit for<br/>Molecular Diagnostic and Clinical Research<br/>Nielsen, Ole; Københavns Universitet, Department of Gastroenterology<br/>D112<br/>Sørensen, Signe; Hospital of Southern Jutland, Focused research unit for<br/>Molecular Diagnostic and Clinical Research<br/>Jawhara, Mohamad; Hospital of Southern Jutland, Focused research unit<br/>for Molecular Diagnostic and Clinical Research<br/>Bygum, Anette; Odense University Hospital, Department of Dermatology<br/>and Allergy Centre<br/>Hvid, Lone; Odense University Hospital, Department of Dermatology and<br/>Allergy Centre<br/>Grauslund, Jakob; Odense University Hospital<br/>Wied, Jimmi; Odense University Hospital, Department of Ophthalmology<br/>Glerup, Henning; Silkeborg Regional Hospital, Diagnostic Centre<br/>Fredberg, Ulrich; Silkeborg Regional Hospital, Diagnostic Centre<br/>Villadsen, Jan ; Silkeborg Regional Hospital, Diagnostic Centre<br/>Kjær, Søren; Silkeborg Regional Hospital, Diagnostic Centre<br/>Fallingborg, Jan; Aalborg University Hospital, Department of<br/>Gastroenterology and Hepatology<br/>Moghadd, Seyed; Herning Regional Hospital, Department of Internal<br/>Medicine<br/>Knudsen, Torben; Hospital of South West Jutland, Department of<br/>Gastroenterology<br/>Brodersen, Jacob; Hospital of South West Jutland, Department of<br/>Gastroenterology<br/>Frøjk, Jesper; Hospital of South West Jutland, Department of<br/>Gastroenterology<br/>Dahlerup, Jens; Aarhus University Hospital, Department of Hepatology and<br/>Gastroenterology<br/>Bojesen, Anders; Hospital of Southern Jutland, IRS-Center Sonderjylland<br/>Sorensen, G; University of Southern Denmark, Institute of Molecular<br/>Medicine<br/>Thiel, Steffen; Aarhus University, Department of Biomedicine</p> |

|                                 |                                                                                                                                                                                                                                                                                                                                                                                                                                                                                                                                                                                                                                                                                                                                                                                                                                                                                                                                                                                                                                                                                                                                                                                                                                                                                                                                                                                                                                                                                                                                                                                                                                                                                                                                                                        |
|---------------------------------|------------------------------------------------------------------------------------------------------------------------------------------------------------------------------------------------------------------------------------------------------------------------------------------------------------------------------------------------------------------------------------------------------------------------------------------------------------------------------------------------------------------------------------------------------------------------------------------------------------------------------------------------------------------------------------------------------------------------------------------------------------------------------------------------------------------------------------------------------------------------------------------------------------------------------------------------------------------------------------------------------------------------------------------------------------------------------------------------------------------------------------------------------------------------------------------------------------------------------------------------------------------------------------------------------------------------------------------------------------------------------------------------------------------------------------------------------------------------------------------------------------------------------------------------------------------------------------------------------------------------------------------------------------------------------------------------------------------------------------------------------------------------|
|                                 | <p>Færgeman, Nils; University of Southern Denmark, Villum Center for Bioanalytical Sciences</p> <p>Brandslund, Ivan; Sygehus Lillebalt, Department of Biochemistry</p> <p>Bennike, Tue ; Aalborg University, Department of Health Science and Technology</p> <p>stensball, allan; Aalborg University, Department of Health Science and Technology</p> <p>Schmidt, Erik; Aalborg University Hospital, Department of Cardiology</p> <p>Franke, Andre; Christian-Albrechts University, Institute of Clinical Molecular Biology</p> <p>Ellinghaus, David; Christian-Albrechts-University of Kiel, Institute of Clinical Molecular Biology</p> <p>Rosenstiel, Philip; Christian-Albrechts-University of Kiel, Institute of Clinical Molecular Biology</p> <p>Raes, Jeroen; KU Leuven-University of Leuven, Department of Microbiology and Immunology</p> <p>Boye, Mette; Hospital of Southern Jutland, Focused research unit for Molecular Diagnostic and Clinical Research</p> <p>Werner, Lars; The Danish Psoriasis Association, N/A</p> <p>Lindgaard, Charlotte; The Danish Colitis-Crohn Association, N/A</p> <p>Munk, Heidi; Odense University Hospital, Department of Rheumatology</p> <p>Nexøe, Anders; Odense University Hospital, Department of Gastroenterology</p> <p>Ellingsen, Torkell; Odense University Hospital, Rheumatology</p> <p>Holmskov, Uffe; Syddansk Universitet Det Sundhedsvidenskabelige Fakultet, institute of molecular medicine</p> <p>Kjeldsen, Jens; Odense University Hospital, Department of Gastroenterology</p> <p>Andersen, Vibeke; Hospital of Southern Jutland, Focused research unit for Molecular Diagnostic and Clinical Research; Syddansk Universitet Det Sundhedsvidenskabelige Fakultet, institute og molecular medicine</p> |
| <b>Primary Subject Heading</b>: | Medical management                                                                                                                                                                                                                                                                                                                                                                                                                                                                                                                                                                                                                                                                                                                                                                                                                                                                                                                                                                                                                                                                                                                                                                                                                                                                                                                                                                                                                                                                                                                                                                                                                                                                                                                                                     |
| Secondary Subject Heading:      | Nutrition and metabolism, Dermatology, Gastroenterology and hepatology, Pharmacology and therapeutics, Rheumatology                                                                                                                                                                                                                                                                                                                                                                                                                                                                                                                                                                                                                                                                                                                                                                                                                                                                                                                                                                                                                                                                                                                                                                                                                                                                                                                                                                                                                                                                                                                                                                                                                                                    |
| Keywords:                       | lifestyle AND chronic inflammatory disease, biomarker AND lifestyle, personalized medicine, patient related outcome measures, treatment outcome, western style diet                                                                                                                                                                                                                                                                                                                                                                                                                                                                                                                                                                                                                                                                                                                                                                                                                                                                                                                                                                                                                                                                                                                                                                                                                                                                                                                                                                                                                                                                                                                                                                                                    |
|                                 |                                                                                                                                                                                                                                                                                                                                                                                                                                                                                                                                                                                                                                                                                                                                                                                                                                                                                                                                                                                                                                                                                                                                                                                                                                                                                                                                                                                                                                                                                                                                                                                                                                                                                                                                                                        |

SCHOLARONE™  
Manuscripts

BMJ

1 **Impact of red and processed meat and fibre intake on treatment**

2 **outcomes among patients with chronic inflammatory diseases:**

3 *Protocol for a prospective cohort study of prognostic factors and*  
4 *personalised medicine*

5 Robin Christensen<sup>1</sup>, Berit L. Heitmann<sup>2,3,4</sup>, Karina W. Andersen<sup>5,6</sup>, Ole Haagen Nielsen<sup>7</sup>, Signe Bek  
6 Sørensen<sup>5,17</sup>, Mohamad Jawhara<sup>5,6,21</sup>, Anette Bygum<sup>8</sup>, Lone Hvid<sup>8</sup>, Jakob Grauslund<sup>9,10</sup>, Jimmi Wied<sup>9,10</sup>,  
7 Henning Glerup<sup>11</sup>, Ulrich Fredberg<sup>11,12</sup>, Jan Alexander Villadsen<sup>11</sup>, Søren Geill Kjær<sup>11</sup>, Jan  
8 Fallingborg<sup>13</sup>, Seyed A. G. R. Moghadd<sup>14</sup>, Torben Knudsen<sup>15</sup>, Jacob Brodersen<sup>15</sup>, Jesper Frøjk<sup>15</sup>, Jens F.  
9 Dahlerup<sup>16</sup>, Anders Bo Bojesen<sup>5</sup>, Grith Lykke Sorensen<sup>17</sup>, Steffen Thiel<sup>18</sup>, Nils J. Færgeman<sup>19</sup>, Ivan  
10 Brandslund<sup>20,21</sup>, Tue Bjerg Bennike<sup>22</sup>, Allan Stensballe<sup>22</sup>, Erik Berg Schmidt<sup>23</sup>, Andre Franke<sup>24</sup>, David  
11 Ellinghaus<sup>24</sup>, Philip Rosenstiel<sup>24</sup>, Jeroen Raes<sup>25,26</sup>, Mette Boye<sup>5</sup>, Lars Werner<sup>27</sup>, Charlotte Lindgaard  
12 Nielsen<sup>28</sup>, Heidi Lausten Munk<sup>11,12</sup>, Anders Bathum Nexøe<sup>29</sup>, Torkell Ellingsen<sup>11,12</sup>, Uffe Holmskov<sup>17</sup>,  
13 Jens Kjeldsen<sup>29</sup>, Vibeke Andersen<sup>5,17,21,30</sup>

14 <sup>1</sup>Musculoskeletal Statistics Unit, the Parker Institute, Bispebjerg and Frederiksberg Hospital,  
15 Copenhagen, Denmark

16 <sup>2</sup>Research Unit for Dietary Studies, the Parker Institute, Bispebjerg and Frederiksberg Hospital,  
17 Copenhagen, Denmark

18 <sup>3</sup>Section for General Medicine, Department of Public Health, University of Copenhagen,  
19 Copenhagen, Denmark

20 <sup>4</sup>National Institute of Public Health, University of Southern Denmark, Odense, Denmark

21 <sup>5</sup>Focused research unit for Molecular Diagnostic and Clinical Research, IRS-Center Sonderjylland,  
22 Hospital of Southern Jutland, Aabenraa, Denmark

23 <sup>6</sup>Organ Centre, Hospital of Southern Jutland, Aabenraa, Denmark

- 1  
2  
3 24 <sup>7</sup>Department of Gastroenterology D112, Herlev Hospital, University of Copenhagen, Herlev,  
4  
5 25 Denmark  
6  
7  
8 26 <sup>8</sup>Department of Dermatology and Allergy Centre, Odense University Hospital, Odense, Denmark  
9  
10  
11 27 <sup>9</sup>Department of Clinical Research, University of Southern Denmark, Odense, Denmark  
12  
13 28 <sup>10</sup>Department of Ophthalmology, Odense University Hospital, Odense, Denmark  
14  
15  
16 29 <sup>11</sup>Diagnostic Centre, Silkeborg Regional Hospital, Silkeborg, Denmark  
17  
18  
19 30 <sup>12</sup>Department of Rheumatology, Odense University Hospital, Odense, Denmark  
20  
21 31 <sup>13</sup>Department of Gastroenterology and Hepatology, Aalborg University Hospital, Aalborg, Denmark  
22  
23  
24 32 <sup>14</sup>Department of Internal Medicine, Herning Regional Hospital, Herning, Denmark  
25  
26  
27 33 <sup>15</sup>Department of Gastroenterology, Hospital of Southwest Jutland, Esbjerg, Denmark  
28  
29 34 <sup>16</sup>Department of Hepatology and Gastroenterology, Aarhus University Hospital, Aarhus, Denmark  
30  
31  
32 35 <sup>17</sup>Institute of Molecular Medicine, University of Southern Denmark, Odense, Denmark  
33  
34  
35 36 <sup>18</sup>Department of Biomedicine, Aarhus University, Aarhus, Denmark  
36  
37  
38 37 <sup>19</sup>Department of Biochemistry and Molecular Biology, Villum Center for Bioanalytical Sciences,  
39  
40 38 University of Southern Denmark, Odense, Denmark  
41  
42 39 <sup>20</sup>Department of Clinical Biochemistry, Lillebaelt Hospital, Vejle, Denmark  
43  
44  
45 40 <sup>21</sup>Institute of Regional Health Research, University of Southern Denmark, Odense, Denmark  
46  
47  
48 41 <sup>22</sup>Department of Health Science and Technology, Aalborg University, Aalborg, Denmark  
49  
50 42 <sup>23</sup>Department of Cardiology, Aalborg University Hospital, Aalborg, Denmark  
51  
52  
53 43 <sup>24</sup>Institute of Clinical Molecular Biology, Christian-Albrechts-University of Kiel, Kiel, Germany  
54  
55  
56 44 <sup>25</sup>Department of Microbiology and Immunology, Rega Institute, KU Leuven-University of Leuven,  
57  
58 45 Leuven, Belgium  
59  
60

1  
2  
3 46 <sup>26</sup>VIB, Center for the Biology of Disease, Leuven, Belgium  
4

5 47 <sup>27</sup>The Danish Psoriasis Association, Taastrup, Denmark  
6  
7

8 48 <sup>28</sup>The Danish Colitis-Crohn Association, Odense, Denmark  
9

10 49 <sup>29</sup>Department of Gastroenterology, Odense University Hospital, Odense, Denmark  
11

12 50 <sup>30</sup>OPEN, University of Southern Denmark, Odense, Denmark  
13  
14

15  
16 **Correspondence:**  
17

18 52 Vibeke Andersen, Focused Research Unit for Molecular Diagnostic and Clinical Research,  
19

20 53 IRS-Center Sonderjylland "Forskningshuset", Hospital of Southern Jutland, Kresten Philipsens Vej  
21

22 54 15 F, 6200 Aabenraa, Denmark, email: vandensen@health.sdu.dk  
23  
24  
25

26 55  
27

28 56  
29  
30  
31  
32  
33  
34  
35  
36  
37  
38  
39  
40  
41  
42  
43  
44  
45  
46  
47  
48  
49  
50  
51  
52  
53  
54  
55  
56  
57  
58  
59  
60

57 **ABSTRACT 300/300**

58 **Introduction:** Chronic inflammatory diseases (CID) are frequently treated with biologic  
59 medications, specifically TNF inhibitors [TNFi]). These medications inhibit the  
60 pro-inflammatory molecule tumour necrosis factor (TNF)- $\alpha$ , which has been strongly  
61 implicated in the aetiology of these diseases. Up to one-third of patients do not, however,  
62 respond to biologics, and lifestyle factors are assumed to affect treatment outcomes. Little  
63 is known about the effects of dietary lifestyle as a prognostic factor that may enable  
64 personalised medicine. The primary outcome of this multidisciplinary collaborative study  
65 will be to identify dietary lifestyle factors that support optimal treatment outcomes.

66 **Methods and analysis:** This prospective cohort study will enrol 320 CID patients who are  
67 prescribed a TNFi between June 2017 and March 2019. Included among the CID patients  
68 will be patients with inflammatory bowel disease (Crohn's disease and ulcerative colitis),  
69 rheumatic disorders (rheumatoid arthritis, axial spondyloarthritis, psoriatic arthritis),  
70 inflammatory skin diseases (psoriasis, hidradenitis suppurativa) and non-infectious  
71 uveitis. At baseline (pre-treatment), patient characteristics will be assessed using  
72 patient-reported outcome measures, clinical assessments of disease activity, quality of life,  
73 and lifestyle, in addition to registry data on comorbidity and concomitant medication(s).  
74 In accordance with current Danish standards, follow-up will be conducted 14-16 weeks  
75 after treatment initiation. For each disease, evaluation of successful treatment response  
76 will be based on established primary and secondary endpoints, including disease-specific  
77 core outcome sets. The major outcome of the analyses will be to detect variability in  
78 treatment effectiveness between patients with different lifestyle characteristics.



1  
2  
3 79 **Ethics and dissemination:** The principle goal of this project is to improve the quality of life  
4  
5  
6 80 of patients suffering from CID by providing evidence to support dietary and other  
7  
8 81 lifestyle recommendations that may improve clinical outcomes. The study is approved by  
9  
10 82 the Ethics Committee (S-20160124) and the Danish Data Protecting Agency (2008-58-035).  
11  
12 83 Study findings will be disseminated through peer-reviewed journals, patient associations,  
13  
14 84 and presentations at international conferences.

15  
16  
17  
18 85 **Trial Registration details:** ClinicalTrials.gov identifier: NCT03173144  
19  
20

21  
22 86 Keywords: biomarker; lifestyle; personalized medicine; patient-reported outcome  
23  
24 87 measures (PROMs); treatment outcome; Western-style diet (WSD)  
25  
26

#### Strengths and limitations of this study

- This study includes a number of diseases treated with biologics targeting the pro-inflammatory cytokine tumour necrosis factor- $\alpha$
- All evaluations will be performed as part of a prospectively designed cohort study using established disease-specific scoring systems
- As comparisons between diseases are limited by disease-specific scoring systems, additional response criteria (e.g. quality of life and disability) will be used for analysis
- The sample size is limited

27  
28  
29  
30  
31  
32  
33  
34  
35  
36  
37  
38  
39  
40  
41  
42  
43  
44  
45  
46  
47  
48  
49  
50  
51  
52  
53  
54  
55 88

56  
57 89  
58  
59  
60

1  
2  
3  
4 90 **INTRODUCTION**

5 91 Chronic inflammatory diseases (CID) are a diverse set of immunologic diseases that  
6  
7  
8 92 include inflammatory bowel disease (IBD) (Crohn's disease [CD] and ulcerative colitis  
9  
10 93 [UC]), rheumatic conditions (rheumatoid arthritis [RA], axial spondyloarthritis  
11  
12 94 [axSpA], psoriatic arthritis [PsA]), inflammatory skin diseases (psoriasis [PsO], hidradenitis  
13  
14 95 suppurativa [HS]), and eye disease (non-infectious uveitis [NiU]). The pro-inflammatory  
15  
16 96 cytokine tumour necrosis factor  $\alpha$  (TNF) is recognized to play an important role in the  
17  
18 97 aetiology of these diseases. Correspondingly, biological agents that inhibit TNF, also  
19  
20 98 known as TNF inhibitors (TNFi), are an important component of treatment. However, a  
21  
22 99 large number of patients do not benefit from TNFi treatment<sup>1</sup>.

23  
24  
25  
26  
27 100 CIDs have a large and negative impact on both individual patients and at a community  
28  
29 101 level as a consequence of health-related workplace productivity loss and health system  
30  
31 102 expense, which is largely influenced by the high cost of providing biologic medications<sup>1</sup>.  
32  
33 103 CIDs are recurring, lifelong illnesses of potentially early onset that can substantially affect  
34  
35 104 the life quality of patients and their families<sup>2-5</sup>. In addition, they are prevalent diseases with  
36  
37 105 IBD affecting 0.5% of the population in the Western world<sup>6</sup>, and RA and PsO affecting  
38  
39 106 respectively 0.3-1.0% and 1.5% of the global population<sup>7,8</sup>. Furthermore, the disease burden,  
40  
41 107 and hence health system burden, is predicted to rise dramatically due to population  
42  
43 108 growth, aging demographics and increasing disease incidence<sup>9-11</sup>.

44  
45  
46  
47  
48 109 The diseases may have overlapping symptoms<sup>12</sup>. For example, some patients with NiU  
49  
50 110 and axSpA may experience bowel symptoms and some patients with IBD may develop  
51  
52 111 extraintestinal manifestations (i.e. eye, joint, and skin symptoms). The diseases are rather  
53  
54 112 complex with both genetic and environmental factors implicated in aetiology. While CIDs  
55  
56 113 share some genetic and environmental predisposing factors, other susceptibility factors  
57  
58  
59  
60

1  
2  
3 114 differ<sup>13</sup>. The genetic architecture of CIDs has previously been investigated by large  
4  
5 115 international consortia<sup>14-20</sup>. Similarly, environmental factors have been investigated in large  
6  
7  
8 116 cohorts with prospectively collected lifestyle data, such as the European Investigation into  
9  
10 117 Cancer and Nutrition (EPIC) Study as well as the Nurses' Health Study (NHS)<sup>21-35</sup>.

118 In light of the notable impact that environment factors play in disease development,  
119 which is further supported by the increasing incidence of these disease<sup>6 11</sup>, it stands to  
120 reason that modifying environment factors such as lifestyle may influence treatment  
121 response. Accordingly, quite a few patients ask their health care professionals for lifestyle  
122 recommendations that can influence the effectiveness of treatment, and in particular the  
123 outcomes achieved with TNFi.

124

### 125 **Evidence-based research**

126 In an attempt to increase value and reduce waste in research, a systematic review of  
127 existing evidence was performed prior to embarking on this study<sup>36</sup>. In a recent systematic  
128 review examining the impact of diet on TNFi response in IBD<sup>37</sup>, it was concluded that there  
129 is scarce evidence linking TNFi treatment response to specific dietary recommendations;  
130 hence, there is a clear research need. Similarly, only a few large prospective studies have  
131 assessed the effects of lifestyle on TNFi-treated CID patients<sup>38</sup>. One prospective study  
132 compared partial enteral nutrition (16 patients), exclusive enteral nutrition (22 patients),  
133 and TNFi (52 patients) therapy in 90 pediatric patients. There were no significant  
134 differences in clinical response rates between the three treatment arms, although the rate of  
135 patients that achieved a faecal calprotectin concentration of  $\leq 250$   $\mu\text{g/g}$  was higher among  
136 the TNFi treated patients<sup>39</sup>.

1  
2  
3 137 More recently, lifestyle factors, as they relate to TNFi therapy among CID patients,  
4  
5 138 were identified as an area for further investigation<sup>40</sup>. In order to explore different  
6  
7  
8 139 hypotheses, we included studies that may be subject to recall bias or bias introduced by  
9  
10 140 lifestyle changes due to the disease itself, e.g. smoking, physical activities, and intake of  
11  
12 141 Western-style diet<sup>40</sup>. After reviewing these potential hypotheses, we proposed a model  
13  
14 142 whereby a diet high in meat and low in fibres may impact inflammation and TNFi  
15  
16 143 treatment<sup>37</sup> (Figure 1).  
17  
18  
19

20 144 Based on previous evidence, we set out to prospectively identify dietary factors that  
21  
22 145 support optimal TNFi treatment outcomes, with the ultimate aim of improving the quality  
23  
24 146 of life of CID patients.  
25  
26  
27  
28 147

### 31 148 **Aims and hypotheses**

32  
33  
34 149 The primary aim of this prospective cohort study is to investigate whether treatment  
35  
36 150 outcomes in CID patients vary with dietary differences. The main hypothesis is that '*Diets*  
37  
38 151 *high in fibre AND low in red and processed meat are associated with improved treatment outcomes*'.  
39  
40  
41 152 Secondary aims are whether and to what extent lifestyle-associated biomarkers have  
42  
43 153 prognostic value for differentiating responders from non-responders based on both  
44  
45 154 disease-specific and generic treatment outcomes.  
46  
47  
48  
49 155

1  
2  
3 156 **METHODS AND ANALYSES**  
4  
5

6 157 **Design**  
7  
8

9  
10 158 The BELIEVE study is a prospective cohort study that will examine disease activity after  
11  
12 159 initiating TNFi treatment. The primary endpoint will be assessed 14-16 weeks after  
13  
14 160 initiation of a TNFi and will be defined based on the specific CID condition. The cohort will  
15  
16 161 be classified as responders (including those who continue with drug treatment) or  
17  
18 162 non-responders (including those who discontinue drug treatment) based on the  
19  
20 163 disease-specific criteria defined below. The decision to discontinue therapy is assumed to  
21  
22 164 be based on a shared decision making process between patients and their physicians, and  
23  
24 165 to be supported by principles outlined in disease-specific guidelines<sup>41</sup>.  
25  
26  
27  
28  
29

30 166

31  
32  
33 167 **Setting**  
34  
35

36 168 This multi-centre study reflects a collaboration between the following centres: 1)  
37  
38 169 Department of Gastroenterology and Hepatology, Aalborg University Hospital; 2)  
39  
40 170 Department of Hepatology and Gastroenterology, Aarhus University Hospital; 3)  
41  
42 171 Diagnostic Centre, Silkeborg Regional Hospital; 4) Department of Internal Medicine,  
43  
44 172 Herning Regional Hospital; 5) Department of Gastroenterology, Herlev Hospital; 6) Organ  
45  
46 173 Centre, Hospital of Southern Jutland; 7) Department of Gastroenterology, Hospital of South  
47  
48 174 West Jutland; 8) Department of Medical Gastroenterology, Department of Rheumatology,  
49  
50 175 Department of Dermatology and Allergy Centre, and Department of Ophthalmology,  
51  
52 176 Odense University Hospital. Study enrolment will take place between June 15, 2017 and  
53  
54  
55  
56  
57  
58  
59  
60

1  
2  
3 177 March 31, 2019, or until the study has enrolled a minimum of 100 patients with IBD, 100  
4  
5 178 patients with RA and 120 patients with axSpA, PsA, PsO, HS and NiU.  
6  
7  
8

9 179

10  
11  
12 180 **Patient characteristics and eligibility criteria**  
13

14  
15  
16 181 Inclusion criteria: patients  $\geq 18$  years with CID who are beginning TNFi therapy, and who  
17  
18 182 have not previously received TNFi treatment, and who are able to read and understand  
19  
20 183 Danish. Exclusion criteria: patients who have previously received a biological treatment  
21  
22 184 and patients who by virtue of illiteracy or cognitive impairment are unable to complete the  
23  
24 185 questionnaire.  
25  
26  
27

28 186 Clinical data (Table 1) will include personal data, data on health and disease, dietary  
29  
30 187 and non-dietary lifestyle information, laboratory measurements, and disease activity scores  
31  
32 188 including patient-reported outcome measures (PROMs), clinical assessments, and  
33  
34 189 laboratory data. Participants will complete validated questionnaires on disease activity,  
35  
36 190 quality of life and lifestyle using an electronic link. Studies have revealed electronic  
37  
38 191 questionnaires to be comparable to paper-based in relation to the outcomes (i.e. PROMs)<sup>42</sup>  
39  
40  
41 192 <sup>43</sup>.  
42  
43  
44  
45

46 193

47  
48  
49 194 **Primary and secondary endpoints**  
50

51  
52  
53 195 *Primary endpoint:* The predefined primary endpoint will be the proportion of patients with a  
54  
55 196 clinical response to therapy 14-16 weeks after treatment initiation. Below are the  
56  
57 197 disease-specific definitions of clinical response to therapy:  
58  
59  
60

- 1  
2  
3 198 • Crohn's disease: clinical remission, defined as Harvey-Bradshaw Index (HBI) of 4 or  
4  
5 199 less<sup>44</sup>  
6  
7  
8  
9 200 • Ulcerative colitis: clinical remission, defined as Mayo Clinic Score of 2 or less (with  
10  
11 201 no individual sub-score of >1)<sup>45</sup>  
12  
13  
14 202 • Rheumatoid arthritis: clinical response, defined as at least a 20% improvement  
15  
16 203 according to the criteria of the American College of Rheumatology (ACR20)<sup>46</sup>  
17  
18  
19  
20 204 • Axial spondyloarthritis: clinical response, defined as at least a 20% improvement  
21  
22 205 according to the Assessment of Spondyloarthritis International Society (ASAS20)<sup>47 48</sup>  
23  
24  
25  
26 206 • Psoriatic arthritis: clinical response, defined as at least a 20% improvement  
27  
28 207 according to the criteria of the American College of Rheumatology (ACR20)<sup>49</sup>  
29  
30  
31  
32 208 • Psoriasis: clinical response, defined as at least a 75% improvement in Psoriasis Area  
33  
34 209 and Severity Index (PASI 75)<sup>50</sup>  
35  
36  
37  
38 210 • Hidradenitis suppurativa: clinical response, defined as at least a 50% reduction in  
39  
40 211 the abscess and inflammatory-nodule count, with no increase in abscess or  
41  
42 212 draining-fistula counts (HiSCR response)<sup>51</sup>  
43  
44  
45  
46 213 • Non-infectious uveitis: clinical response, defined as those who did not have a  
47  
48 214 treatment failure (treatment failure will be based on assessment of new  
49  
50 215 inflammatory lesions, best corrected visual acuity, anterior chamber cell grade, and  
51  
52 216 vitreous haze grade)<sup>52</sup>  
53  
54  
55

56 217 *Key secondary outcomes:* Major secondary outcomes, also to be measured 14-16 weeks after  
57  
58 218 treatment initiation, include disease-specific outcome measures that cover core outcome  
59  
60

1  
2  
3 219 sets, the generic health-related quality of life (HRQoL) and disability at endpoint. Below are  
4  
5 220 a list of disease-specific secondary outcomes.

- 6  
7  
8  
9 221 • Crohn's disease: STRIDE (abdominal pain, diarrhea, altered bowel habit, SES-CD  
10  
11 222 [presence of ulcers, ulcerated surface, affected surface, presence of narrowing,  
12  
13 223 number of affected segments], alterations of cross-sectional imaging [MR, CT,  
14  
15 224 ultrasound][only when endoscopy cannot adequately evaluate inflammation]),  
16  
17 225 HBI (general well-being, abdominal pain, number of liquid stools per day,  
18  
19 226 abdominal Mass, extraintestinal manifestations [abscess, fistulas, fissures,  
20  
21 227 arthralgia, uveitis, erythema nodosum, pyoderma gangrenosum, mouth ulcers]),  
22  
23 228 physician global assessment, number of draining fistulas, corticosteroid-free  
24  
25 229 remission, concomitant medication.
- 26  
27  
28  
29  
30  
31  
32  
33 230 • Ulcerative colitis: STRIDE (rectal bleeding, altered bowel habit, endoscopic  
34  
35 231 remission [Mayo endoscopic sub-score of 0-1]), Mayo Clinical Score (Mayo  
36  
37 232 endoscopic sub-score, stools, rectal bleeding, physician global assessment), Mayo  
38  
39 233 "normal mucosal appearance", Mayo clinical response, SCCAI (bowel frequency  
40  
41 234 [day], bowel frequency [night], urgency of defecation, blood in stool, general  
42  
43 235 well-being, extracolonic features), physician global assessment, corticosteroid-free  
44  
45 236 remission, concomitant medication.
- 46  
47  
48  
49  
50  
51  
52  
53 237 • Rheumatoid arthritis: Tender joints, Swollen joints, pain, physician global  
54  
55 238 assessment, patient global assessment, health assessment Questionnaire (HAQ),  
56  
57 239 C-reactive protein, DAS28-CRP, simplified disease activity index (SDAI).  
58  
59  
60



- 1  
2  
3  
4 240 • Axial spondyloarthritis: bath ankylosing spondylitis metrology index  
5  
6 241 (BASMI), bath ankylosing spondylitis functional index (BASFI), bath ankylosing  
7  
8  
9 242 spondylitis disease activity index (BASDAI), total score for back pain, physician  
10  
11 243 global assessment, patient global assessment, C-reactive protein.  
12  
13  
14 244 • Psoriatic arthritis: tender joints, swollen joints, psoriatic arthritis pain, physician  
15  
16  
17 245 global assessment, patient global assessment, HAQ-DI, C-reactive protein,  
18  
19 246 DAS28-CRP, simplified disease activity index (SDAI), PASI.  
20  
21  
22  
23 247 • Psoriasis: PASI, physician global assessment, patient global assessment, psoriatic  
24  
25 248 arthritis pain, dermatology life quality index (DLQI) total Score.  
26  
27  
28  
29 249 • Hidradenitis suppurativa: percentage of participants who achieve abscess and  
30  
31 250 inflammatory nodule (AN) count of 0, 1, and 2, respectively, patient's global  
32  
33 251 assessment of skin pain, modified Sartorius score.  
34  
35  
36  
37 252 • Non-infectious uveitis: new active, inflammatory chorioretinal or retinal vascular  
38  
39 253 lesions relative to baseline, inability to achieve  $\leq 0.5+$  or a 2-step increase relative to  
40  
41 254 the best state achieved at all visits in anterior chamber cell grade or vitreous haze  
42  
43 255 grade, worsening of best corrected visual acuity by  $\geq 15$  letters relative to best state  
44  
45 256 achieved.  
46  
47  
48  
49  
50  
51 257 *Exploratory secondary (tertiary) outcomes:* Additional exploratory outcomes will include  
52  
53 258 biological measures, disease-specific disease activity measures as individual measure and  
54  
55 259 combined scores as well as changes of these (including those measured by  
56  
57  
58 260 physician/patients such as patients' health-related quality of life) at first clinical follow up<sup>53</sup>  
59  
60

1  
2  
3 261 (week 14-16) (Table 1). Other outcomes include changes in the use of concomitant  
4  
5 262 medication, achievement of steroid-free remission, serious adverse events such as  
6  
7  
8 263 hospitalisation, and the need for surgery at first clinical follow up (Table 1)<sup>53</sup>.  
9  
10

11 264

12  
13  
14  
15 265 **Prognostic factors**

16  
17  
18 266 *Primary exposure variable:* For the primary prognostic model, the primary exposure variables  
19  
20 267 will be prioritized in the following order:

- 21  
22  
23  
24 268 • The upper tertile of the sample (33.3% of the total sample), based on the ratio of  
25  
26 269 fibre to meat intake, is associated with better treatment outcomes.  
27  
28  
29 270 • The lower tertile of the sample (33.3% of the total sample) with respect to intake of  
30  
31 271 red and processed meat, and the upper tertile of the sample (33.3% of the total  
32  
33 272 sample) with respect to intake of dietary fibres, are independently associated with  
34  
35 273 better treatment outcomes, and a potential interaction between them may further  
36  
37 274 improve treatment outcomes.  
38  
39  
40

41  
42 275 *Other (exploratory) exposure variables:*

- 43  
44  
45  
46 276 • Other lifestyle factors independently or combined (red and processed meat intake,  
47  
48 277 vegetable intake, dietary fibre intake, cereal intake, gluten consumption, legume  
49  
50 278 intake, red wine consumption, dairy product intake, amount of physical activity,  
51  
52 279 smoking status, total protein/fat, protein/fat from red and processed meat, glycemic  
53  
54 280 index)  
55  
56  
57 281 • Pretreatment lifestyle-associated biomarkers  
58  
59  
60

- 1  
2  
3  
4 282 • Combinations of lifestyle factors and lifestyle-associated biomarkers  
5  
6 283 • Gene-environment interaction analyses  
7  
8  
9 284 • Pretreatment levels of inflammatory molecules  
10  
11  
12 285

13  
14  
15 286 **Data management**  
16

17  
18  
19 287 The electronic questionnaire is in Danish. Participants will access the questionnaire by an  
20  
21 288 electronic link which will be sent to their personal, electronic mailbox. All data will be  
22  
23 289 stored in a secure research storage facility<sup>54</sup>. Information registered by clinicians and  
24  
25 290 technicians will periodically be transferred from paper format to electronic format using  
26  
27 291 either double entry of data or automated forms processing<sup>55</sup>.  
28  
29  
30

31  
32 292 No patient risks are foreseen as a direct result of this project. Clinicians will treat  
33  
34 293 enrolled patients in the same fashion as non-enrolled patients. As a consequence, no data  
35  
36 294 monitoring committee will be established.  
37  
38  
39

40 295

41  
42  
43 296 **Statistical methods**  
44

45  
46  
47 297 Prognostic factor research was developed to aid healthcare providers in estimating the  
48  
49 298 probability or risk that a specific event will occur in the future. Hence, it has the potential to  
50  
51 299 inform clinical decision-making<sup>56</sup>. Conceptually, a good prognostic model is one that  
52  
53 300 functions for patients other than those from whom the data was derived<sup>57</sup>. Our intention is  
54  
55 301 to use data obtained from this rigorously designed, prospective cohort study to explore our  
56  
57  
58  
59  
60

1  
2  
3  
4 302 ability to predict clinical response across specific CID conditions (Y=primary endpoint) and  
5  
6 303 to explore whether diets high in fibre AND low in red and processed meat (X=assessed at  
7  
8  
9 304 baseline) are an informative prognostic factor. Per default, the statistical models will  
10  
11 305 include the specific CID condition and the clinical centre as fixed effects. Specific details  
12  
13  
14 306 will be part of the final statistical analysis plan (SAP). In terms of transparency, when  
15  
16  
17 307 reporting the multivariable models the study will adhere to guidelines from the  
18  
19  
20 308 *'Transparent Reporting of a multivariable prediction model for Individual Prognosis or Diagnosis'*  
21  
22 309 (TRIPOD).

23  
24  
25 310 *Sample size considerations:* Deciding sample size is a well-known difficulty with  
26  
27 311 exploratory prognostic factor research studies. To obtain an adequate number of outcome  
28  
29 312 events we apply "the rule of thumb" whereby 10 outcomes are needed for each  
30  
31  
32 313 independent variable. We plan to enrol 320 patients in total and we anticipate that 50% of  
33  
34  
35 314 these will experience a clinical response during the 14-16 week period after TNFi initiation<sup>1</sup>.  
36  
37  
38 315 With this in mind, and anticipating that we will see at least 160 events (i.e. clinical response  
39  
40  
41 316 among the 320 patients), the study is sufficiently power to explore the impact of as many as  
42  
43  
44 317 16 independent variables including condition and clinical centre. Since using the "rule of  
45  
46 318 thumb" method to justify sample size is a debated practice, we went one step further and  
47  
48  
49 319 estimated the statistical power to detect differences between two dietary groups. For the  
50  
51  
52 320 contrast between groups and for a comparison of two independent binomial proportions  
53  
54 321 (those with high fibre AND low meat intake vs other) using Pearson's Chi-square statistic,  
55  
56  
57 322 with a Chi-square approximation, with a two-sided significance level of 0.05 ( $P < 0.05$ ), a  
58  
59 323 total sample size of 318 - assuming an "allocation ratio" of 1 to 2 (one third) - has an  
60

1  
2  
3  
4 324 approximate power of 0.924 (i.e. >90% statistical power) if the anticipated proportions  
5  
6  
7 325 responding are 60% and 40% respectively.  
8

9 326 Statistical programming will be done using the software SAS, STATA or R, with  
10  
11 327 transparent reporting of the source code used to analyse the data. Computational details  
12  
13 328 will be available in the pre-specified SAP. These will be finalised before data collection is  
14  
15 329 complete. Our primary analysis set will be based on observations available at the time of  
16  
17 330 study closure. In other words, we will consider 'Data as observed' to be our primary  
18  
19 331 resource for statistical inference. However, for the purpose of sensitivity, multiple  
20  
21 332 sensitivity analyses will be performed to assess the robustness of the primary analyses,  
22  
23 333 including analyses based on the "Non-responder-imputation" and multiple-imputation  
24  
25 334 analyses, which are based on model-based approaches for missing data (these details will  
26  
27 335 be available in the final SAP). A simplistic "null responder imputation" would represent a  
28  
29 336 conservative base case and is likely valid even if data is "missing not at random"<sup>58</sup>, as it  
30  
31 337 assumes, and implies that patients have not improved or have worsened after entering the  
32  
33 338 study.  
34  
35  
36  
37  
38  
39  
40  
41  
42

43 339 No interim analyses will be performed. All reported P values will be two-sided and by  
44  
45 340 default these will not be adjusted for multiple comparisons. However, due to potential  
46  
47 341 issues of multiplicity, as multiple statistical tests will be performed in the study, we will  
48  
49 342 interpret "statistically significant" findings in the context of whether the 95% confidence  
50  
51 343 interval (95%CI) excludes outcomes that could be perceived as clinically important. We will  
52  
53 344 use the following consistent language to describe effects that might appear as chance  
54  
55 345 findings: "*The prognostic factor appears to have little or no effect on the clinical outcome if the point*  
56  
57  
58  
59  
60

1  
2  
3  
4 346 *estimate or the boundaries of the 95% CI lies between 0.80 and 1.25*". Thus, despite an apparently  
5  
6 347 statistically significant finding ( $P<0.05$ ), a relative point estimate within the range of 0.80  
7  
8  
9 348 and 1.25 will not be considered a clinically meaningful effect.  
10

11 349

### 14 350 **Strengths and limitations of the study**

16  
17 351 The food frequency questionnaire (FFQ) we use in the present study has been widely used  
18  
19 352 in prospective cohort studies, including in European prospective investigations in the fields  
20  
21 353 of oncology and chronic diseases<sup>59 60</sup>. It has been extensively used and evaluated in the  
22  
23 354 Danish population, and results from different methods demonstrate consistency<sup>61 62</sup>.  
24  
25

26  
27 355 However, the FFQ is not without limits, in particular with respect to the lack of information  
28  
29 356 on portion sizes<sup>63 64</sup>. We, therefore, modified the FFQ to capture information on portion  
30  
31 357 size<sup>63</sup>. A second potential limitation relates to comprehensive questionnaire completion.  
32  
33

34  
35 358 However, in a pilot study of 10 hospital patients (50-70 years of age) the FFQ was  
36  
37 359 completed within 40-50 minutes and no complaints were reported. The imprecision of the  
38  
39

40 360 FFQ will lead to large confidence intervals. The result will most likely lead to null results  
41  
42

43 361 (rather than type 2 errors). The disease groups are expected to vary in several aspects such  
44  
45 362 as age, gender and body mass index (BMI). We will, however, be unable to determine the  
46  
47

48 363 potential effect of selective diet reporting on responders and non-responders<sup>65</sup>. On the  
49  
50

51 364 other hand, studies have suggested that dietary patterns are relatively stable among adults  
52  
53

54 365 in the Danish population<sup>66</sup>. Due to study design and the limited number of participants,  
55  
56

57 366 this study may not capture every lifestyle difference between responders and  
58  
59

60 367 non-responders. Similarly, this study has only limited power to detect gene-environment

1  
2  
3  
4 368 interactions. In order to avoid potential type 2 errors, it is important that the results are  
5  
6 369 replicated in other well-characterized patient populations using prospectively sampled  
7  
8  
9 370 dietary information. To further evaluate the robustness of the results, study results would  
10  
11  
12 371 preferably be replicated in cohorts from other countries.  
13

14 372

15 373

#### 16 17 18 19 20 21 374 **Project organisation**

22  
23  
24 375 The study team is organised into three significant groups: a Clinical Research Group  
25  
26  
27 376 (CRG), an Analytical Research Group (ARG) (Figure 2) and a Steering Committee (SC). The  
28  
29  
30 377 CRG includes specialists from gastroenterology, rheumatology, dermatology and  
31  
32 378 ophthalmology who will be implicated in the clinical care and assessment of study  
33  
34  
35 379 participants. The ARG will be responsible for performing laboratory analyses on the  
36  
37 380 collected biological material. Finally, the SC -- whose members include Professor Uffe  
38  
39  
40 381 Holmskov, Professor Jens Kjeldsen, Professor Torkell Ellingsen, and Professor Vibeke  
41  
42  
43 382 Andersen -- are responsible for planning and organizing the study within the appropriate  
44  
45  
46 383 legal framework, facilitating meetings for the three study groups and for scientific  
47  
48 384 follow-up. The group as a whole, including clinicians and analysts, is responsible for the  
49  
50  
51 385 scientific results and budget.

52  
53 386 Collaboration between patients and health professionals on research projects is a  
54  
55  
56 387 relatively new phenomenon<sup>67-69</sup>. The involvement of patients in research (patient research  
57  
58  
59 388 partners [PRPs]) will ideally will give a stronger voice to patients' views on research,  
60

1  
2  
3  
4 389 specifically with respect to research priorities. Furthermore, individual patients and patient  
5  
6  
7 390 organisations can contribute to research study design, preparing educational material,  
8  
9 391 discussing results, disseminating results, and recruiting study participants.  
10  
11 392 Recommendations on incorporating PRPs into research study processes suggest that they  
12  
13  
14 393 should be provided with relevant support and education. With this initiative, we were keen  
15  
16  
17 394 to gain experience with PRPs. Thus, this project was built with input from the Danish  
18  
19 395 Colitis-Crohn's Association, represented by its director Charlotte Lindgaard Nielsen, the  
20  
21  
22 396 Danish Psoriasis Association, represented by its director Lars Werner, and three individual  
23  
24  
25 397 RA patients from one of the participating clinical departments.

26  
27 398 The SC will hold telephone conferences every 2-4 week, but more often when  
28  
29  
30 399 necessary, and face-to-face meetings 3-4 times per year. Among participants, the SC will  
31  
32  
33 400 organise telephone conferences every 2-4 weeks, again more often when necessary, and  
34  
35  
36 401 face-to-face meetings at the time of enrolment and every year thereafter until the  
37  
38 402 conclusion of the study.

39  
40  
41 403

#### 42 43 44 404 **Perspectives**

45  
46  
47 405 The use of prognosis research evidence at multiple stages is central to the process of  
48  
49  
50 406 translational research, with the ultimate goal of improving patient outcomes. Prognosis  
51  
52  
53 407 research includes various aspects of importance to healthcare professionals, enabling them  
54  
55  
56 408 to guide individual patients in terms of shared decision making via overall prognosis,  
57  
58 409 knowledge on important prognostic factors or models and subsequently (from randomised  
59  
60



1  
2  
3 410 trial evidence) stratified medicine<sup>56 70-72</sup>. We anticipate that the BELIEVE study will reveal  
4  
5 411 prognostic factors of importance, including whether the diet of the patient is likely to  
6  
7 412 interfere with the outcome of being prescribed a TNFi treatment. Hopefully, by combining  
8  
9 413 various phenotype and genotype aspects into the prognostic models, the BELIEVE study  
10  
11 414 will add value to the long-term goal of achieving “personalised medicine”.

12  
13  
14  
15  
16 415 We will seek to replicate findings that are identified as having prognostic value in  
17  
18 416 other prospective cohorts, including from a planned study of CID cases from the Danish  
19  
20 417 “Diet, Health and Cancer” cohort and potentially from other cohorts with lifestyle data<sup>73 74</sup>.

#### 21 22 23 24 418 **Dissemination of results to the public and scientifically**

25  
26  
27 419 The target journal for the primary outcome will be a general medical journal directed at  
28  
29 420 family physicians. Family physicians see CID patients across the entire spectrum of disease.  
30  
31 421 Moreover, lifestyle recommendations are an important element of general practice. Hence,  
32  
33 422 although family physicians are not necessarily the primary decision-makers with respect to  
34  
35 423 treatment of CID patients, a role more ably assumed by specialists, they have considerable  
36  
37 424 influence on lifestyle decisions for CID patients. Subsequently, other hypotheses will be  
38  
39 425 analysed and manuscripts prepared (independent of findings), with the intention of  
40  
41 426 submitting additional articles to specialized journals in the areas of nutrition, immunology,  
42  
43 427 gastroenterology, rheumatology, dermatology and ophthalmology.

44  
45  
46  
47  
48  
49  
50  
51 428 Authorship confers credit and has important academic, social and financial implications,  
52  
53 429 and therefore any authorship on manuscripts coming from the BELIEVE study is  
54  
55  
56 430 associated with responsibility and accountability for the published work. Thus we intend  
57  
58  
59 431 to follow the recommendations of the International Committee of Medical Journal Editors  
60

1  
2  
3  
4 432 (ICMJE) to ensure that contributors who have made substantive intellectual contributions  
5  
6  
7 433 to a paper are given credit as authors, but also that contributors credited as authors  
8  
9 434 understand their role in taking responsibility and being accountable for the published  
10  
11  
12 435 work.  
13  
14  
15 436 The ICMJE criteria for authorship was designed to distinguish authors from other  
16  
17  
18 437 contributors based on the following 4 criteria: (i) substantial contributions to the conception  
19  
20  
21 438 or design of the work; or the acquisition, analysis or interpretation of data for the work;  
22  
23 439 AND (ii) drafting the work or revising it critically for important intellectual content; AND  
24  
25  
26 440 (iii) final approval of the version to be published; AND (iv) agreement to be accountable for  
27  
28  
29 441 all aspects of the work in ensuring that questions related to the accuracy or integrity of any  
30  
31 442 part of the work are appropriately investigated and resolved.  
32  
33

34 443 In addition to the scientific reporting of results, major findings with translational  
35  
36 444 implications will be communicated to health professionals, patient organisations, public  
37  
38  
39 445 health policy-makers and to the general public through various media and news activities.  
40  
41  
42  
43  
44

#### 447 **Ethics**

448 Written informed consent will be obtained from participants before participation in the  
49  
50  
51 449 study. The project has been approved by The Regional Scientific Ethical Committee  
52  
53 450 (S-20160124) and the Danish Data Protection Agency (2008-58-035). The procedures  
54  
55  
56 451 followed are in accordance with the ethical standards of the responsible committee on  
57  
58 452 human experimentation (institutional and national) and with the Helsinki  
59  
60

1  
2  
3  
4 453 Declaration of 1975 with later amendments.  
5  
6

7 454  
8  
9

10 455 **Funding**

11  
12 456 This project is part of a project that has received funding from the European Union's  
13  
14 457 Horizon 2020 Research and Innovation Programme under grant agreement No 733100" (P.  
15  
16  
17 458 Rosenstiel, A. Franke, J. Raes, V. Andersen). Funding has furthermore been received from  
18  
19 459 Odense Patient data Explorative Network (OPEN) (OP-332, V. Andersen), "Knud og Edith  
20  
21 460 Eriksen's Mindefond" (V. Andersen), Region of Southern Denmark (V. Andersen),  
22  
23 461 University of Southern Denmark (V. Andersen, U. Holmskov). The Parker Institute,  
24  
25 462 Bispebjerg and Frederiksberg Hospital (R. Christensen, B. L. Heitmann) are supported by a  
26  
27 463 core grant from the Oak Foundation (OCAY-13-309).  
28  
29  
30

31 464 **Acknowledgements**

32  
33  
34 465 Lina A Knudsen and Mark Unger are thanked for English proofreading.  
35  
36

37 466 **Author Contributions:** VA, BLH, and RC wrote the first draft. All other authors, KWA,  
38  
39 467 OHN, SBS, MJ, AB, LH, JG, JW, HG, UF, JAV, SGK, JF, SAGRM, TK, JB, JF, JFD, ABB, GLS,  
40  
41 468 ST, NJF, IB, TBB, AS, EBS, AF, DE, PR, JR, MB, LW, CLN, HLM, ABN, TK, JK, UH,  
42  
43 469 contributed to the conception and design of the study. All authors accepted the final  
44  
45 470 submitted version.  
46  
47  
48

49 471  
50

51  
52 472 **Conflicts of Interest:**

53  
54  
55 473 All authors declare no conflict of interest. However, the following authors declare: B.  
56  
57 474 Heitmann has received funding from "MatPrat", the information office for Norwegian egg  
58  
59  
60

1  
2  
3 475 and meat; L. Hvid is on the advisory board for Abbvie A/S; J. Fallingborg is on the advisory  
4  
5 476 boards for AbbVie A/S, MSD Denmark, Takeda Pharma A/S, and Ferring Pharmaceuticals  
6  
7  
8 477 A/S; V. Andersen receives compensation for consultancy and for being a member of the  
9  
10 478 advisory board for MSD Denmark (Merck) and Janssen A/S. The funding sponsors had no  
11  
12 479 role in the design of the study; in the collection, analysis, or interpretation of data; in the  
13  
14 480 writing of the manuscript, or in the decision to publish the results.  
15  
16  
17  
18 481  
19  
20 482  
21  
22  
23 483

**Table 1. Collection of patient characteristics, outcome measures, and explanatory**

**variables**

| Variable                                     | Pre | Week<br>14-16 |
|----------------------------------------------|-----|---------------|
| <i>Clinical data</i> <sup>1</sup> :          |     |               |
| Gender (F, M)                                | X   |               |
| Age (years)                                  | X   |               |
| Diagnosis (disease)                          | X   |               |
| Onset of diagnosis (year) <sup>2</sup>       | X   |               |
| Education (level) <sup>3</sup>               | X   |               |
| Menopause (year)                             | X   |               |
| Comorbidity (diseases, Charlson index)       | X   |               |
| Medication (predefined choices)              | X   | X             |
| Diet (FFQ) <sup>3</sup> (predefined choices) | X   |               |
| Changes in diet (predefined choices)         |     | X             |

|    |                                                                 |      |   |
|----|-----------------------------------------------------------------|------|---|
| 1  |                                                                 |      |   |
| 2  |                                                                 |      |   |
| 3  |                                                                 |      |   |
| 4  | Non-dietary lifestyle factors <sup>3</sup> (predefined choices) | X    | X |
| 5  |                                                                 |      |   |
| 6  |                                                                 |      |   |
| 7  |                                                                 |      |   |
| 8  |                                                                 |      |   |
| 9  | <i>Investigations:</i>                                          |      |   |
| 10 |                                                                 |      |   |
| 11 | Height (cm)                                                     | X    |   |
| 12 |                                                                 |      |   |
| 13 | Weight (kg)                                                     | X    | X |
| 14 |                                                                 |      |   |
| 15 | Body mass index (kg/cm <sup>2</sup> )                           | X    | X |
| 16 |                                                                 |      |   |
| 17 | Routine blood analyses <sup>4</sup>                             | X    | X |
| 18 |                                                                 |      |   |
| 19 | Endoscopy <sup>5</sup>                                          | X    | X |
| 20 |                                                                 |      |   |
| 21 |                                                                 |      |   |
| 22 |                                                                 |      |   |
| 23 |                                                                 |      |   |
| 24 |                                                                 |      |   |
| 25 |                                                                 |      |   |
| 26 |                                                                 |      |   |
| 27 |                                                                 |      |   |
| 28 | <i>Biological samples<sup>6</sup>:</i>                          |      |   |
| 29 |                                                                 |      |   |
| 30 | Fasting blood samples                                           | X    | X |
| 31 |                                                                 |      |   |
| 32 | Faeces samples                                                  | X    | X |
| 33 |                                                                 |      |   |
| 34 | Urine samples                                                   | X    | X |
| 35 |                                                                 |      |   |
| 36 | Biopsies <sup>5</sup>                                           | X    | X |
| 37 |                                                                 |      |   |
| 38 |                                                                 |      |   |
| 39 |                                                                 |      |   |
| 40 |                                                                 |      |   |
| 41 |                                                                 |      |   |
| 42 |                                                                 |      |   |
| 43 |                                                                 |      |   |
| 44 | <i>Crohn's disease (CD)</i>                                     |      |   |
| 45 |                                                                 |      |   |
| 46 | Disease location (predefined choices)                           | X    |   |
| 47 |                                                                 |      |   |
| 48 | Prior operations (y/n, description)                             | X    |   |
| 49 |                                                                 |      |   |
| 50 | Disease behaviour (fistulising, luminal)                        | X    |   |
| 51 |                                                                 |      |   |
| 52 | Perianal involvement (y/n)                                      | X    |   |
| 53 |                                                                 |      |   |
| 54 | STRIDE – (y/n)                                                  | n.a. | X |
| 55 |                                                                 |      |   |
| 56 |                                                                 |      |   |
| 57 |                                                                 |      |   |
| 58 |                                                                 |      |   |
| 59 |                                                                 |      |   |
| 60 |                                                                 |      |   |

|                                                                                                                                                    |          |          |
|----------------------------------------------------------------------------------------------------------------------------------------------------|----------|----------|
| Abdominal pain (y/n)                                                                                                                               | X        | X        |
| Diarrhoea (y/n)                                                                                                                                    | X        | X        |
| Altered bowel habit (y/n)                                                                                                                          | X        | X        |
| SES-CD (score)                                                                                                                                     | X        | X        |
| Presence of ulcers (score)                                                                                                                         | X        | X        |
| Ulcerated surface (score)                                                                                                                          | X        | X        |
| Affected surface (score)                                                                                                                           | X        | X        |
| Presence of narrowing (score)                                                                                                                      | X        | X        |
| Number of affected segments (score)                                                                                                                | X        | X        |
| Alterations of cross-sectional imaging (MR, CT, UL) (y/n) <sup>7</sup>                                                                             | X        | X        |
| HBI index (score)                                                                                                                                  | X        | X        |
| <b>*HBI of 4 or less (y/n)</b>                                                                                                                     | <b>X</b> | <b>X</b> |
| General well-being (score)                                                                                                                         | X        | X        |
| Abdominal pain (score)                                                                                                                             | X        | X        |
| No. of liquid stools per day (N)                                                                                                                   | X        | X        |
| Abdominal mass (score)                                                                                                                             | X        | X        |
| Manifestations (abscess, fistulas, fissures, arthralgia, uveitis, erythema nodosum, pyoderma gangrenosum, mouth ulcers, one point for each)<br>(N) | X        | X        |
| Physician global assessment (score)                                                                                                                | X        | X        |
| Physician global assessment (0–100 mm VAS)                                                                                                         | X        | X        |

|                                                                      |      |   |
|----------------------------------------------------------------------|------|---|
| Patient global assessment (0–100 mm VAS)                             | X    | X |
| Corticosteroid-free remission <sup>8</sup> (y/n)                     |      | X |
| Concomitant medication (y/n, predefined choices)                     | X    | X |
| Number of draining fistulas (fistulising CD)                         | X    | X |
|                                                                      |      |   |
| <b><i>Ulcerative colitis (UC)</i></b>                                |      |   |
| Disease location (predefined choices)                                | X    |   |
| Prior operations (y/n, description)                                  | X    |   |
| STRIDE criteria (y/n)                                                | n.a. | X |
| Rectal bleeding (y/n)                                                | X    | X |
| Altered bowel habit (y/n)                                            | X    | X |
| Endoscopic remission (Mayo endoscopic sub-score of 0-1)              | X    | X |
| *Mayo Clinical Score of 2 or less with no individual sub-score of >1 | X    | X |
| Mayo “normal mucosal appearance” (y/n)                               | X    | X |
| Mayo clinical response <sup>9</sup> (y/n)                            | X    | X |
| Mayo clinical score (score)                                          | X    | X |
| Mayo endoscopic sub-score (score)                                    | X    | X |
| Stools (score)                                                       | X    | X |
| Rectal bleeding (score)                                              | X    | X |
| Physician global assessment (score)                                  | X    | X |
| SCCAI (score)                                                        | X    | X |

|                                                  |             |          |
|--------------------------------------------------|-------------|----------|
| Bowel frequency (day) (score)                    | X           | X        |
| Bowel frequency (night) (score)                  | X           | X        |
| Urgency of defecation (score)                    | X           | X        |
| Blood in stool (score)                           | X           | X        |
| General well-being (score)                       | X           | X        |
| Extracolonic features (1 per manifestation)      | X           | X        |
| Physician global assessment (0–100 mm VAS)       | X           | X        |
| Patient global assessment (0–100 mm VAS)         | X           | X        |
| Corticosteroid-free remission <sup>8</sup> (y/n) |             | X        |
| Concomitant medication (y/n, predefined choices) | X           | X        |
|                                                  |             |          |
| <b><i>Rheumatoid arthritis (RA)</i></b>          |             |          |
| Positive for anti-CCP/RF (y/n)                   | X           |          |
| Swollen-joint count (of 28/66 joints examined)   | X           | X        |
| Tender-joint count (of 28/68 joints examined)    | X           | X        |
| DAS28-CRP (score)                                | X           | X        |
| Simplified disease activity index (SDAI) (score) | X           | X        |
| <b>*ACR20 (y/n)</b>                              | <b>n.a.</b> | <b>X</b> |
| ACR50 (y/n)                                      | n.a.        | X        |
| ACR70 (y/n)                                      | n.a.        | X        |
| EULAR good or moderate response (y/n)            | n.a.        | X        |



|                                                              |             |          |
|--------------------------------------------------------------|-------------|----------|
| Low disease activity (DAS28 <3.2)                            | n.a.        | X        |
| DAS28 remission (DAS28 <2.6)                                 | n.a.        | X        |
| Physician global assessment (0-100 mm VAS)                   | X           | X        |
| Patient global assessment (0-100 mm VAS)                     | X           | X        |
| Patient assessment of pain (0-100 mm VAS)                    | X           | X        |
| HAQ (score)                                                  | X           | X        |
|                                                              |             |          |
| <i>Axial spondyloarthritis (axSpA)</i>                       |             |          |
| Positive for HLA-B27 (y/n)                                   | X           |          |
| BASDAI (score)                                               | X           | X        |
| BASFI (score)                                                | X           | X        |
| BASMI (score)                                                |             |          |
| Total score for back pain (0–100 mm VAS)                     | X           | X        |
| Patient global assessment of disease activity (0-100 mm VAS) | X           | X        |
| Patient assessment of pain (0-100 mm VAS)                    | X           | X        |
| Physician global assessment (0-100 mm VAS)                   | X           | X        |
| <b>*ASAS20 (y/n)</b>                                         | <b>n.a.</b> | <b>X</b> |
| ASAS40 (y/n)                                                 | n.a.        | X        |
| ASAS partial response (y/n)                                  | n.a.        | X        |
| ASAS5/6 response (y/n)                                       | n.a.        | X        |
|                                                              |             |          |

|                                                              |             |          |
|--------------------------------------------------------------|-------------|----------|
| <i>Psoriatic arthritis (PsA)</i>                             |             |          |
| Dactylitis (y/n)                                             | X           | X        |
| Enthesitis (y/n)                                             | X           | X        |
| PASI (score)                                                 | X           | X        |
| PASI 75 response (y/n)                                       | n.a.        | X        |
| PASI 90 response (y/n)                                       | n.a.        | X        |
| <b>*ACR20</b>                                                | <b>n.a.</b> | <b>X</b> |
| Swollen-joint count (of 28/66 joints examined)               | X           | X        |
| Tender-joint count (of 28/68 joints examined)                | X           | X        |
| DAS28-CRP (score)                                            | X           | X        |
| Patient global assessment of disease activity (0-100 mm VAS) | X           | X        |
| Patient assessment of PsA pain (0-100 mm VAS)                | X           | X        |
| Physician global assessment (0-100 mm VAS)                   | X           | X        |
| Simplified disease activity index (SDAI)                     | X           | X        |
| HAQ (score)                                                  | X           | X        |
|                                                              |             |          |
| <i>Psoriasis (PsO)</i>                                       |             |          |
| Psoriatic arthritis (y/n)                                    | X           | X        |
| PASI (score)                                                 | X           | X        |
| *PASI75 response (y/n)                                       | n.a.        | X        |
| PASI90 response (y/n)                                        | n.a.        | X        |

|                                                                                                                |             |          |
|----------------------------------------------------------------------------------------------------------------|-------------|----------|
| Patient global assessment of disease activity (0-100 mm VAS)                                                   | X           | X        |
| Patient assessment of PsA pain (0-100 mm VAS)                                                                  | X           | X        |
| Physician global assessment (0-100 mm VAS)                                                                     | X           | X        |
| DLQI (score)                                                                                                   | X           | X        |
|                                                                                                                |             |          |
| <i>Hidradenitis Suppurativa (HS)</i>                                                                           |             |          |
| <b>*HiSCR response</b>                                                                                         | <b>n.a.</b> | <b>X</b> |
| Hurley stage <sup>10</sup> (score)                                                                             | X           | X        |
| Previous systemic treatment (y/n, description)                                                                 | X           |          |
| Prior surgery (y/n, description)                                                                               | X           |          |
| Lesion counts (N)                                                                                              | X           | X        |
| Total no. of abscesses and inflammatory nodules (N)                                                            | X           | X        |
| No. of abscesses (N)                                                                                           | X           | X        |
| No. of inflammatory nodules (N)                                                                                | X           | X        |
| No. of draining fistulas (N)                                                                                   | X           | X        |
| Modified Sartorius score (score)                                                                               | X           | X        |
| Percentage of participants who achieve abscess and inflammatory nodule (AN) count of 0, 1, and 2, respectively | X           | X        |
| Patient global assessment of skin pain (score)                                                                 | X           | X        |
| DLQI (score)                                                                                                   | X           | X        |
|                                                                                                                |             |          |

|                                                                                                                                                                 |             |          |
|-----------------------------------------------------------------------------------------------------------------------------------------------------------------|-------------|----------|
| <i>Non-infectious uveitis (NiU)</i>                                                                                                                             |             |          |
| SUN (score)                                                                                                                                                     | X           | X        |
| <b>*Uveitis treatment failure (y/n)</b>                                                                                                                         | <b>n.a.</b> | <b>X</b> |
| New active, inflammatory chorioretinal or retinal vascular lesions relative to baseline (y/n)                                                                   | X           | X        |
| Inability to achieve $\leq 0.5+$ or a 2-step increase relative to best state achieved at all visits in anterior chamber cell grade or vitreous haze grade (y/n) | X           | X        |
| Worsening of best corrected visual acuity by $\geq 15$ letters relative to best state achieved (y/n)                                                            | X           | X        |
|                                                                                                                                                                 |             |          |
| <i>Health-related quality of life<sup>11</sup></i>                                                                                                              | <b>X</b>    | <b>X</b> |
| SF12 (score)                                                                                                                                                    | X           | X        |
| SHS (score)                                                                                                                                                     | X           | X        |
| Physician global assessment (0–100 mm VAS)                                                                                                                      | X           | X        |
| Patient global assessment (0–100 mm VAS)                                                                                                                        | X           | X        |
| ROME-III (score)                                                                                                                                                | X           | X        |
| NYHA (score)                                                                                                                                                    | X           | X        |
| Cont. anti-TNF treatment (y/n, predefined choices for stopping if no)                                                                                           | X           | X        |
|                                                                                                                                                                 |             |          |
| <i>Adverse events</i>                                                                                                                                           |             |          |

|                                                  |   |   |
|--------------------------------------------------|---|---|
| Discontinuation due to adverse events (y/n)      |   | X |
| Serious adverse event (y/n)                      |   | X |
| Death (y/n)                                      |   | X |
| Occurrence of surgery (y/n)                      |   | X |
| Occurrence of hospital admission (y/n)           |   | X |
| Occurrence of disease-related complication (y/n) |   | X |
|                                                  |   |   |
| <i>Laboratory</i> <sup>4</sup>                   |   |   |
| CRP (mg/l) <sup>12</sup>                         | X | X |

**\*Primary endpoint for the individual diseases**

<sup>1</sup>Data will be collected using a questionnaire as well as local and national registries.

<sup>2</sup>Registry data will be retrieved from the Danish registries using the Danish individual civil registration number (CPR) including BIO-IBD<sup>75</sup>, DANBIO<sup>76</sup>, DERMBIO<sup>77</sup> (database on IBD, RA, HS, axSpA, PsA, and PsO patients on biological therapy), the National Patient Registry (e.g. comorbidity), registries on medication and use of receipts, local laboratory databases (laboratory data) and the electronic patient records (side effects).

<sup>3</sup>Lifestyle (dietary and non-dietary) will be registered using a validated food-frequency questionnaire (FFQ) that includes food items, and a photographic food atlas of picture series of portion sizes will be used to assess intake of food groups, such as meat and dairy, and calculate total energy, fibre, protein, fat, sugar, and carbohydrate intakes as well as glycemic index and load. In addition, questions on non-diet lifestyle factors (smoking,

1  
2  
3  
4 physical activity, alcohol consumption, and use of over-the-counter medicine [use of  
5  
6 probiotics, prebiotics, painkillers, laxative, and anti-diarrhoea agents]) as well as  
7  
8 educational level and year of menopause (female) are included<sup>63</sup>. The follow-up  
9  
10 questionnaire is identical to the initial questionnaire apart from the questions on food items  
11  
12 that only contain questions on changes of diet since the last questionnaire.  
13  
14

15  
16  
17 <sup>4</sup>Routine blood analyses include C-reactive protein (CRP), haemoglobin, erythrocyte  
18  
19 count, haematocrit, erythrocyte mean cell volume (MCV), mean cell haemoglobin (MCH)  
20  
21 and mean cell haemoglobin concentration (MCHC), leucocyte count, differential count,  
22  
23 thrombocytes, albumin, K<sup>+</sup> potassium, Na<sup>+</sup> sodium, creatinine, coagulation factor II+VII+X,  
24  
25 alanine aminotransferase (ALAT), alkaline phosphatase, gamma-glutamyl transferase  
26  
27 (GGT), haemoglobin glycation (Hb1Ac), lipids (cholesterol, high density, low density  
28  
29 cholesterol), and transglutaminase.  
30  
31  
32  
33

34  
35 <sup>5</sup>Only IBD patients  
36  
37

38  
39 <sup>6</sup>From all participants, blood, urine, and faeces are sampled. In addition, from IBD patients,  
40  
41 intestinal biopsies are sampled. In selected cases, the additional biological material on  
42  
43 participants from this study may be retrieved from the Patobank and the Danish Biobank.  
44  
45 The samples will be collected adhering to the Sample PRE-analytical Code (SPREC) and  
46  
47 Biospecimen Reporting for Improved Study Quality (BRISQ) guidelines, using standard  
48  
49 operational procedures (SOPs) describing and logging primary container, centrifugation  
50  
51 conditions, centrifugation parameters, and storage conditions<sup>78 79</sup>. The biological material  
52  
53 will be stored in OPEN (biological material from OUH) or at SHS (biological material from  
54  
55  
56  
57  
58  
59  
60

the other hospitals).

<sup>7</sup>Only CD patients when endoscopy cannot adequately evaluate inflammation.

<sup>8</sup>Corticosteroid-free remission. Clinical remission in patients using oral corticosteroids at baseline (Pre) that have discontinued corticosteroids and in clinical remission at first follow-up.

<sup>9</sup>A reduction in complete Mayo score of  $\geq 3$  points and  $\geq 30\%$  from baseline (or a partial Mayo score of  $\geq 2$  points and  $\geq 25\%$  from baseline, if the complete Mayo score was not performed at the visit) with an accompanying decrease in rectal bleeding sub-score of  $\geq 1$  point or absolute rectal bleeding sub-score of  $\leq 1$  point

<sup>10</sup>Data for the Hurley stage reflect actual assessment. A patient's overall Hurley stage is the highest stage across all affected anatomical sites. Stage 1 is defined as the localised formation of single or multiple abscesses without sinus tracts or scarring, stage II as recurrent abscesses (single or multiple) with sinus tract formation and scarring, and stage III as multiple abscesses with extensive, interconnected sinus tracts and scarring.

<sup>11</sup>All participants will be asked whether they have any complaints regarding or are known with diseases affecting the bowel, the skin, rheumatic complaints etc., and if no to both questions they will not be asked to complete the relevant questionnaire.

<sup>12</sup>Biological response defined as a drop in CRP level of more than 25% or to the normal level among patients with an elevated CRP before treatment (higher than normal range)<sup>80</sup>.

Abbreviations: ACR, American College of Rheumatology; ASAS20/40, Assessment of Spondyloarthritis International Society; BASDAI, Bath Ankylosing Spondylitis Disease

1  
2  
3  
4 Activity Index; BASFI (Bath Ankylosing Spondylitis Functional Index; BASMI, Bath  
5  
6 Ankylosing Spondylitis Metrology Index; CRP, C-reactive protein; DAS28, Disease activity  
7  
8 score; DLQI<sup>81,82</sup>, Dermatology Life Quality Index; FFQ, Food frequency questionnaire; HBI,  
9  
10 Harvey-Bradshaw Index; HiSCR<sup>51</sup>, Hidradenitis Suppurativa Clinical Response; HAQ,  
11  
12 Health Assessment Questionnaire; NYHA, New York Heart Association; PASI, Psoriasis  
13  
14 Area and Severity Index; SCCAI, Simple Clinical Colitis Activity Index; SES-CD, Simple  
15  
16 Endoscopic Score for Crohn's Disease; SF12, Short Form Health Survey; SHS<sup>83,84</sup>, Short  
17  
18 Health Scale; SUN, Standardization of Uveitis Nomenclature for Reporting Clinical Data;  
19  
20 STRIDE, Selecting Therapeutic Targets in Inflammatory Bowel Disease <sup>53</sup>  
21  
22  
23  
24  
25  
26

484



485 **FIGURE LEGENDS**486 **Figure 1. Hypothesis for effects of diet in relation to treatment effect**

487 **(Left)** Low levels of fibre intake may promote microbial metabolism of mucus as the main  
488 energy source<sup>37 85 86</sup>. This will lead to decrease of the mucus layer. Further, degradation of mucus  
489 releases free sulphate which would then become available for utilisation by sulphate-reducing  
490 bacteria (like *Bilophila wadsworthia*) for microbial produced hydrogen sulphide<sup>87</sup>. In addition, high  
491 intake of food containing organic sulphur and sulphate additives, such as meat and processed meat,  
492 may increase the amount of sulphate for microbial produced hydrogen sulphide<sup>88 89</sup>. The resultant  
493 hydrogen sulphide from low intake of fibre and high intake of meat may reduce the disulphide  
494 bonds in the mucus network rendering the mucus layer penetrable to e.g. bacteria<sup>87 90</sup>. Then,  
495 microbial-associated molecular patterns (MAMPs) from microbes or contained in the diet may reach  
496 the epithelium and activate the pattern recognition receptors (PRR) such as Toll-like receptors  
497 (TLRs) on the enterocytes (intestinal epithelial cells, IEC), and next activate nuclear factor-kappa B  
498 (NFkB), type I interferon (IFN), and other inflammatory pathways. This leads to production of  
499 pro-inflammatory (tumour necrosis factor- $\alpha$  (TNF), interleukin (IL)-1 $\beta$ , IL-6, IFN, IL-17 etc.), and  
500 anti-inflammatory (primarily IL-10) cytokines and chemokines that will next activate innate  
501 lymphocytic cells (ILC) and other immune cells and the immune system in general<sup>91 92</sup>. There is some  
502 support for such a mechanism in CID, including findings of; high amounts of sulphate-reducing  
503 bacteria in UC patients<sup>87 93</sup>; an association between the highest tertile of carbohydrate-restricted diet  
504 and RA, in a nested case-control study among 386 individuals who developed RA and 1886 matched  
505 controls from the Swedish Västerbotten Intervention Program (VIP) cohort with prospectively  
506 sampled dietary survey<sup>94</sup>; association of high fibre intake with low risk of CD among 170 776  
507 participants from the prospective Nurses' Health Study I (NHSI)<sup>23</sup>; association of high intake of red  
508 meat and total protein and risk of developing inflammatory polyarthritis in the population-based  
509 prospective cohort of 25 630 participants from the European Prospective Investigation of Cancer in  
510 Norfolk (EPIC-Norfolk)<sup>35</sup>. Finally, a prospective study of 191 UC patients in remission found that

1  
2  
3 511 high consumption of meat, particularly red and processed meat, protein, and alcohol was associated  
4  
5 512 with risk of relapse, and that high sulphur or sulphate intakes may offer an explanation for the  
6  
7 513 observed findings<sup>95</sup>. Additionally, support of the notation that diet may affect systemic immune  
8  
9 514 response is provided by the finding that intake of low-glycemic index diet was found to lower  
10  
11 515 secretion of TNF and IL-6 from stimulated peripheral blood mononuclear cells from obese humans<sup>96</sup>.  
12  
13  
14 516 **(Right)** Intake of high fibre and low meat may promote an effective mucosal barrier and support the  
15  
16 517 effects of outcome after drug targeting the pro-inflammatory molecule TNF (TNF inhibitors [TNFi]).  
17  
18 518 Intake of soluble plant fibre has been found to block bacterial adhesion to gut enterocytes in animal  
19  
20 519 and cell studies<sup>97</sup>. The genetic architecture of the individual may also impact the influence of lifestyle  
21  
22 520 factors<sup>15</sup>. Hence, in order to provide lifestyle recommendations, we need to understand the effects of  
23  
24 521 lifestyle on the immune system, and how lifestyle may improve the therapeutic outcome and reduce  
25  
26 522 the need of medical treatment in the individual person. Information on diet and non-diet lifestyle  
27  
28 523 exposures may be collected by using e.g. questionnaires and lifestyle-associated biomarkers or a  
29  
30 524 combination of these methods<sup>98-100</sup>. Evidence-based biomarkers for lifestyle assessment are scarce  
31  
32 525 <sup>101-121</sup> and mostly used for studies on healthy individuals<sup>122-125</sup>.  
33  
34  
35  
36  
37 526 **Figure 2. Organisation and patient research partners**  
38  
39  
40  
41  
42  
43  
44  
45  
46  
47  
48  
49  
50  
51  
52  
53  
54  
55  
56  
57  
58  
59  
60

## Reference List

1. Nielsen OH, Ainsworth MA. Tumor necrosis factor inhibitors for inflammatory bowel disease. *The New England journal of medicine* 2013;369(8):754-62. doi: 10.1056/NEJMct1209614 [published Online First: 2013/08/24]
2. Baumgart DC, Carding SR. Inflammatory bowel disease: cause and immunobiology. *Lancet* 2007;369(9573):1627-40. doi: 10.1016/S0140-6736(07)60750-8
3. Baumgart DC, Sandborn WJ. Inflammatory bowel disease: clinical aspects and established and evolving therapies. *Lancet* 2007;369(9573):1641-57. doi: 10.1016/S0140-6736(07)60751-X
4. Strober W, Fuss I, Mannon P. The fundamental basis of inflammatory bowel disease. *The Journal of clinical investigation* 2007;117(3):514-21. doi: 10.1172/JCI30587
5. Taurog JD, Chhabra A, Colbert RA. Ankylosing Spondylitis and Axial Spondyloarthritis. *The New England journal of medicine* 2016;374(26):2563-74. doi: 10.1056/NEJMra1406182 [published Online First: 2016/06/30]
6. Molodecky NA, Soon IS, Rabi DM, et al. Increasing incidence and prevalence of the inflammatory bowel diseases with time, based on systematic review. *Gastroenterology* 2012;142(1):46-54.e42; quiz e30. doi: 10.1053/j.gastro.2011.10.001 [published Online First: 2011/10/18]
7. WHO. <http://www.who.int/chp/topics/rheumatic/en/>. 20.2.2017
8. Poddubnyy D, Rudwaleit M. Efficacy and safety of adalimumab treatment in patients with rheumatoid arthritis, ankylosing spondylitis and psoriatic arthritis. *Expert opinion on drug safety* 2011;10(4):655-73. doi: 10.1517/14740338.2011.581661 [published Online First: 2011/05/11]
9. Cross M, Smith E, Hoy D, et al. The global burden of rheumatoid arthritis: estimates from the global burden of disease 2010 study. *Annals of the rheumatic diseases* 2014;73(7):1316-22. doi: 10.1136/annrheumdis-2013-204627 [published Online First: 2014/02/20]
10. Parisi R, Symmons DP, Griffiths CE, et al. Global epidemiology of psoriasis: a systematic review of incidence and prevalence. *The Journal of investigative dermatology* 2013;133(2):377-85. doi: 10.1038/jid.2012.339 [published Online First: 2012/09/28]
11. Kaplan GG. The global burden of IBD: from 2015 to 2025. *Nature reviews Gastroenterology & hepatology* 2015;12(12):720-7. doi: 10.1038/nrgastro.2015.150 [published Online First: 2015/09/02]
12. Scott DL, Wolfe F, Huizinga TW. Rheumatoid arthritis. *Lancet* 2010;376(9746):1094-108.
13. Lettre G, Rioux JD. Autoimmune diseases: insights from genome-wide association studies. *HumMolGenet* 2008;17(R2):R116-R21.
14. Ellinghaus D, Jostins L, Spain SL, et al. Analysis of five chronic inflammatory diseases identifies 27 new associations and highlights disease-specific patterns at shared loci. *Nature genetics* 2016;48(5):510-8. doi: 10.1038/ng.3528 [published Online First: 2016/03/15]

- 1  
2  
3 570 15. Yadav P, Ellinghaus D, Remy G, et al. Genetic Factors Interact With Tobacco Smoke to  
4 571 Modify Risk for Inflammatory Bowel Disease in Humans and Mice.  
5 572 *Gastroenterology* 2017 doi: 10.1053/j.gastro.2017.05.010 [published Online First:  
6 573 2017/05/17]  
7  
8 574 16. Liu JZ, van Sommeren S, Huang H, et al. Association analyses identify 38 susceptibility  
9 575 loci for inflammatory bowel disease and highlight shared genetic risk across  
10 576 populations. *Nature genetics* 2015;47(9):979-86. doi: 10.1038/ng.3359 [published  
11 577 Online First: 2015/07/21]  
12  
13 578 17. Cortes A, Hadler J, Pointon JP, et al. Identification of multiple risk variants for  
14 579 ankylosing spondylitis through high-density genotyping of immune-related loci.  
15 580 *Nature genetics* 2013;45(7):730-8. doi: 10.1038/ng.2667 [published Online First:  
16 581 2013/06/12]  
17  
18 582 18. Bowes J, Budu-Aggrey A, Huffmeier U, et al. Dense genotyping of immune-related  
19 583 susceptibility loci reveals new insights into the genetics of psoriatic arthritis. *Nature*  
20 584 *communications* 2015;6:6046. doi: 10.1038/ncomms7046 [published Online First:  
21 585 2015/02/06]  
22  
23 586 19. Okada Y, Wu D, Trynka G, et al. Genetics of rheumatoid arthritis contributes to biology  
24 587 and drug discovery. *Nature* 2014;506(7488):376-81. doi: 10.1038/nature12873  
25 588 [published Online First: 2014/01/07]  
26  
27 589 20. Tsoi LC, Spain SL, Knight J, et al. Identification of 15 new psoriasis susceptibility loci  
28 590 highlights the role of innate immunity. *Nature genetics* 2012;44(12):1341-8. doi:  
29 591 10.1038/ng.2467 [published Online First: 2012/11/13]  
30  
31 592 21. Ananthakrishnan AN, Khalili H, Higuchi LM, et al. Higher predicted vitamin D status is  
32 593 associated with reduced risk of Crohn's disease. *Gastroenterology*  
33 594 2012;142(3):482-9. doi: 10.1053/j.gastro.2011.11.040 [published Online First:  
34 595 2011/12/14]  
35  
36 596 22. Ananthakrishnan AN, Khalili H, Konijeti GG, et al. Long-term intake of dietary fat and  
37 597 risk of ulcerative colitis and Crohn's disease. *Gut* 2014;63(5):776-84. doi:  
38 598 10.1136/gutjnl-2013-305304 [published Online First: 2013/07/06]  
39  
40 599 23. Ananthakrishnan AN, Khalili H, Konijeti GG, et al. A prospective study of long-term  
41 600 intake of dietary fiber and risk of Crohn's disease and ulcerative colitis.  
42 601 *Gastroenterology* 2013;145(5):970-7. doi: 10.1053/j.gastro.2013.07.050 [published  
43 602 Online First: 2013/08/06]  
44  
45 603 24. Ananthakrishnan AN, Khalili H, Song M, et al. Zinc intake and risk of Crohn's disease  
46 604 and ulcerative colitis: a prospective cohort study. *International journal of*  
47 605 *epidemiology* 2015;44(6):1995-2005. doi: 10.1093/ije/dyv301 [published Online  
48 606 First: 2015/11/08]  
49  
50 607 25. Ananthakrishnan AN, Khalili H, Song M, et al. High School Diet and Risk of Crohn's  
51 608 Disease and Ulcerative Colitis. *Inflammatory bowel diseases* 2015;21(10):2311-9.  
52 609 doi: 10.1097/mib.0000000000000501 [published Online First: 2015/08/04]  
53  
54 610 26. Chan SS, Luben R, Olsen A, et al. Association between high dietary intake of the n-3  
55 611 polyunsaturated fatty acid docosahexaenoic acid and reduced risk of Crohn's disease.

- 1  
2  
3 612 *Alimentary pharmacology & therapeutics* 2014;39(8):834-42. doi:  
4 613 10.1111/apt.12670 [published Online First: 2014/03/13]  
5  
6 614 27. Chan SS, Luben R, Olsen A, et al. Body mass index and the risk for Crohn's disease and  
7 615 ulcerative colitis: data from a European Prospective Cohort Study (The IBD in EPIC  
8 616 Study). *The American journal of gastroenterology* 2013;108(4):575-82. doi:  
9 617 10.1038/ajg.2012.453 [published Online First: 2013/01/16]  
10  
11 618 28. Chan SS, Luben R, van Schaik F, et al. Carbohydrate intake in the etiology of Crohn's  
12 619 disease and ulcerative colitis. *Inflammatory bowel diseases* 2014;20(11):2013-21.  
13 620 doi: 10.1097/mib.000000000000168 [published Online First: 2014/09/30]  
14  
15 621 29. John S, Luben R, Shrestha SS, et al. Dietary n-3 polyunsaturated fatty acids and the  
16 622 aetiology of ulcerative colitis: a UK prospective cohort study. *European journal of*  
17 623 *gastroenterology & hepatology* 2010;22(5):602-6. doi:  
18 624 10.1097/MEG.0b013e3283352d05  
19  
20 625 30. de Silva PS, Luben R, Shrestha SS, et al. Dietary arachidonic and oleic acid intake in  
21 626 ulcerative colitis etiology: a prospective cohort study using 7-day food diaries.  
22 627 *European journal of gastroenterology & hepatology* 2014;26(1):11-8. doi:  
23 628 10.1097/MEG.0b013e328365c372 [published Online First: 2013/11/13]  
24  
25 629 31. de Silva PS, Olsen A, Christensen J, et al. An association between dietary arachidonic  
26 630 acid, measured in adipose tissue, and ulcerative colitis. *Gastroenterology*  
27 631 2010;139(6):1912-17.  
28  
29 632 32. Hart AR, Luben R, Olsen A, et al. Diet in the aetiology of ulcerative colitis: a European  
30 633 prospective cohort study. *Digestion* 2008;77(1):57-64.  
31  
32 634 33. Opstelten J, Leenders M, Dik V, et al. Dairy products, dietary calcium and the risk of  
33 635 inflammatory bowel disease: results from a European prospective cohort  
34 636 investigation. *Journal of Crohns & Colitis* 2016;10:S462.  
35  
36 637 34. Lahiri M, Luben RN, Morgan C, et al. Using lifestyle factors to identify individuals at  
37 638 higher risk of inflammatory polyarthritis (results from the European Prospective  
38 639 Investigation of Cancer-Norfolk and the Norfolk Arthritis Register--the  
39 640 EPIC-2-NOAR Study). *Annals of the rheumatic diseases* 2014;73(1):219-26. doi:  
40 641 10.1136/annrheumdis-2012-202481 [published Online First: 2013/03/19]  
41  
42 642 35. Pattison DJ, Symmons DP, Lunt M, et al. Dietary risk factors for the development of  
43 643 inflammatory polyarthritis: evidence for a role of high level of red meat consumption.  
44 644 *Arthritis and rheumatism* 2004;50(12):3804-12. doi: 10.1002/art.20731 [published  
45 645 Online First: 2004/12/14]  
46  
47 646 36. Lund H, Brunnhuber K, Juhl C, et al. Towards evidence based research. *BMJ (Clinical*  
48 647 *research ed)* 2016;355:i5440. doi: 10.1136/bmj.i5440 [published Online First:  
49 648 2016/11/01]  
50  
51 649 37. Andersen V, Hansen AK, Heitmann AB. Potential Impact of Diet on Treatment Effect  
52 650 from Anti-TNF Drugs in Inflammatory Bowel Disease. *Nutrients* 2017;9(3) doi:  
53 651 10.3390/nu9030286 [published Online First: 2017/03/16]  
54  
55 652 38. Heatley RV. Nutritional replenishment as an alternative to TNF-alpha in Crohn's disease.  
56 653 *Lancet* 1997;349(9066):1702. [published Online First: 1997/06/07]  
57  
58  
59  
60



- 1  
2  
3 654 39. Lee D, Baldassano RN, Otley AR, et al. Comparative Effectiveness of Nutritional and  
4 655 Biological Therapy in North American Children with Active Crohn's Disease.  
5 656 *Inflammatory bowel diseases* 2015;21(8):1786-93. doi:  
6 657 10.1097/mib.0000000000000426 [published Online First: 2015/05/15]  
7  
8 658 40. Andersen V, Holmskov U, Sorensen SB, et al. A Proposal for a Study on Treatment  
9 659 Selection and Lifestyle Recommendations in Chronic Inflammatory Diseases: A  
10 660 Danish Multidisciplinary Collaboration on Prognostic Factors and Personalised  
11 661 Medicine. *Nutrients* 2017;9(5) doi: 10.3390/nu9050499 [published Online First:  
12 662 2017/05/16]  
13  
14 663 41. RADS. Rådet for Anvendelse af Dyr Sygehusmedicin, <http://www.rads.dk/> 20.2.2017  
15 664 [accessed 20.2.2017 2017].  
16  
17 665 42. Ali FM, Johns N, Finlay A, et al. Comparison of the paper-based and electronic versions  
18 666 of the Dermatology Life Quality Index (DLQI): evidence of equivalence. *The British*  
19 667 *journal of dermatology* 2017 doi: 10.1111/bjd.15314 [published Online First:  
20 668 2017/01/24]  
21  
22 669 43. Campbell N, Ali F, Finlay AY, et al. Equivalence of electronic and paper-based  
23 670 patient-reported outcome measures. *Quality of life research : an international*  
24 671 *journal of quality of life aspects of treatment, care and rehabilitation*  
25 672 2015;24(8):1949-61. doi: 10.1007/s11136-015-0937-3 [published Online First:  
26 673 2015/02/24]  
27  
28 674 44. Khanna R, Bressler B, Levesque BG, et al. Early combined immunosuppression for the  
29 675 management of Crohn's disease (REACT): a cluster randomised controlled trial.  
30 676 *Lancet* 2015;386(10006):1825-34. doi: 10.1016/s0140-6736(15)00068-9 [published  
31 677 Online First: 2015/09/08]  
32  
33 678 45. Vermeire S, O'Byrne S, Keir M, et al. Etrolizumab as induction therapy for ulcerative  
34 679 colitis: a randomised, controlled, phase 2 trial. *Lancet* 2014;384(9940):309-18. doi:  
35 680 10.1016/s0140-6736(14)60661-9 [published Online First: 2014/05/13]  
36  
37 681 46. Taylor PC, Keystone EC, van der Heijde D, et al. Baricitinib versus Placebo or  
38 682 Adalimumab in Rheumatoid Arthritis. *The New England journal of medicine*  
39 683 2017;376(7):652-62. doi: 10.1056/NEJMoa1608345 [published Online First:  
40 684 2017/02/16]  
41  
42 685 47. Baeten D, Sieper J, Braun J, et al. Secukinumab, an Interleukin-17A Inhibitor, in  
43 686 Ankylosing Spondylitis. *The New England journal of medicine*  
44 687 2015;373(26):2534-48. doi: 10.1056/NEJMoa1505066 [published Online First:  
45 688 2015/12/25]  
46  
47 689 48. Sieper J, Rudwaleit M, Baraliakos X, et al. The Assessment of SpondyloArthritis  
48 690 international Society (ASAS) handbook: a guide to assess spondyloarthritis. *Annals*  
49 691 *of the rheumatic diseases* 2009;68 Suppl 2:ii1-44. doi: 10.1136/ard.2008.104018  
50 692 [published Online First: 2009/05/14]  
51  
52 693 49. Mease PJ, McInnes IB, Kirkham B, et al. Secukinumab Inhibition of Interleukin-17A in  
53 694 Patients with Psoriatic Arthritis. *The New England journal of medicine*  
54 695 2015;373(14):1329-39. doi: 10.1056/NEJMoa1412679 [published Online First:  
55 696 2015/10/01]  
56  
57  
58  
59  
60

- 1  
2  
3 697 50. Lebowohl M, Strober B, Menter A, et al. Phase 3 Studies Comparing Brodalumab with  
4 698 Ustekinumab in Psoriasis. *The New England journal of medicine*  
5 699 2015;373(14):1318-28. doi: 10.1056/NEJMoa1503824 [published Online First:  
6 700 2015/10/01]
- 7  
8 701 51. Kimball AB, Okun MM, Williams DA, et al. Two Phase 3 Trials of Adalimumab for  
9 702 Hidradenitis Suppurativa. *The New England journal of medicine*  
10 703 2016;375(5):422-34. doi: 10.1056/NEJMoa1504370 [published Online First:  
11 704 2016/08/16]
- 12  
13 705 52. Jaffe GJ, Dick AD, Brezin AP, et al. Adalimumab in Patients with Active Noninfectious  
14 706 Uveitis. *The New England journal of medicine* 2016;375(10):932-43. doi:  
15 707 10.1056/NEJMoa1509852 [published Online First: 2016/09/08]
- 16  
17 708 53. Peyrin-Biroulet L, Sandborn W, Sands BE, et al. Selecting Therapeutic Targets in  
18 709 Inflammatory Bowel Disease (STRIDE): Determining Therapeutic Goals for  
19 710 Treat-to-Target. *The American journal of gastroenterology* 2015;110(9):1324-38.  
20 711 doi: 10.1038/ajg.2015.233 [published Online First: 2015/08/26]
- 21  
22 712 54. OPEN.  
23  
24 713 [http://www.sdu.dk/en/Om\\_SDU/Institutter\\_centre/Klinisk\\_institut/Forskning/Forsk](http://www.sdu.dk/en/Om_SDU/Institutter_centre/Klinisk_institut/Forskning/Forsk)  
25 714 [ningsenheder/open.aspx](http://www.sdu.dk/en/Om_SDU/Institutter_centre/Klinisk_institut/Forskning/Forsk) 2017 [accessed 20.02.2017 2017].
- 26  
27 715 55. Drosos GI, Pozo JL. The causes and mechanisms of meniscal injuries in the sporting and  
28 716 non-sporting environment in an unselected population. *The Knee* 2004;11(2):143-9.  
29 717 doi: 10.1016/s0968-0160(03)00105-4 [published Online First: 2004/04/07]
- 30  
31 718 56. Hemingway H, Croft P, Perel P, et al. Prognosis research strategy (PROGRESS) 1: a  
32 719 framework for researching clinical outcomes. *BMJ (Clinical research ed)*  
33 720 2013;346:e5595. doi: 10.1136/bmj.e5595 [published Online First: 2013/02/07]
- 34  
35 721 57. Altman DG, Royston P. What do we mean by validating a prognostic model? *Stat Med*  
36 722 2000;19(4):453-73. [published Online First: 2000/03/01]
- 37  
38 723 58. White IR, Horton NJ, Carpenter J, et al. Strategy for intention to treat analysis in  
39 724 randomised trials with missing outcome data. *BMJ (Clinical research ed)*  
40 725 2011;342:d40. doi: 10.1136/bmj.d40 [published Online First: 2011/02/09]
- 41  
42 726 59. Racine A, Carbonnel F, Chan SS, et al. Dietary Patterns and Risk of Inflammatory Bowel  
43 727 Disease in Europe: Results from the EPIC Study. *Inflammatory bowel diseases*  
44 728 2016;22(2):345-54. doi: 10.1097/mib.0000000000000638 [published Online First:  
45 729 2015/12/31]
- 46  
47 730 60. <http://epic.iarc.fr/>. European Prospective Investigation into Cancer and Nutrition EPIC  
48 731 2014 [
- 49  
50 732 61. Togo P, Heitmann BL, Sorensen TI, et al. Consistency of food intake factors by different  
51 733 dietary assessment methods and population groups. *The British journal of nutrition*  
52 734 2003;90(3):667-78. [published Online First: 2003/09/18]
- 53  
54 735 62. Tjonneland A, Overvad K, Haraldsdottir J, et al. Validation of a semiquantitative food  
55 736 frequency questionnaire developed in Denmark. *IntJEpidemiol* 1991;20(4):906-12.
- 56  
57 737 63. Koster-Rasmussen R, Siersma V, Halldorsson TI, et al. Missing portion sizes in  
58 738 FFQ--alternatives to use of standard portions. *Public health nutrition*

- 1  
2  
3 739 2015;18(11):1914-21. doi: 10.1017/s1368980014002389 [published Online First:  
4 740 2014/11/11]  
5  
6 741 64. Tjonneland A, Haraldsdottir J, Overvad K, et al. Influence of individually estimated  
7 742 portion size data on the validity of a semiquantitative food frequency questionnaire.  
8 743 *IntJEpidemiol* 1992;21(4):770-77.  
9  
10 744 65. Heitmann BL, Lissner L. Dietary underreporting by obese individuals--is it specific or  
11 745 non-specific? *BMJ (Clinical research ed)* 1995;311(7011):986-9. [published Online  
12 746 First: 1995/10/14]  
13  
14 747 66. Osler M, Heitmann BL. The validity of a short food frequency questionnaire and its  
15 748 ability to measure changes in food intake: a longitudinal study. *International journal*  
16 749 *of epidemiology* 1996;25(5):1023-9. [published Online First: 1996/10/01]  
17  
18 750 67. de Wit MP, Berlo SE, Aanerud GJ, et al. European League Against Rheumatism  
19 751 recommendations for the inclusion of patient representatives in scientific projects.  
20 752 *Annals of the rheumatic diseases* 2011;70(5):722-6. doi: 10.1136/ard.2010.135129  
21 753 [published Online First: 2011/01/25]  
22  
23 754 68. Kappelman MD, Long MD, Martin C, et al. Evaluation of the patient-reported outcomes  
24 755 measurement information system in a large cohort of patients with inflammatory  
25 756 bowel diseases. *Clinical gastroenterology and hepatology : the official clinical*  
26 757 *practice journal of the American Gastroenterological Association*  
27 758 2014;12(8):1315-23.e2. doi: 10.1016/j.cgh.2013.10.019 [published Online First:  
28 759 2013/11/05]  
29  
30  
31 760 69. Cheung PP, de Wit M, Bingham CO, 3rd, et al. Recommendations for the Involvement of  
32 761 Patient Research Partners (PRP) in OMERACT Working Groups. A Report from the  
33 762 OMERACT 2014 Working Group on PRP. *The Journal of rheumatology*  
34 763 2016;43(1):187-93. doi: 10.3899/jrheum.141011 [published Online First:  
35 764 2015/04/17]  
36  
37 765 70. Steyerberg EW, Moons KG, van der Windt DA, et al. Prognosis Research Strategy  
38 766 (PROGRESS) 3: prognostic model research. *PLoS medicine* 2013;10(2):e1001381.  
39 767 doi: 10.1371/journal.pmed.1001381 [published Online First: 2013/02/09]  
40  
41 768 71. Riley RD, Hayden JA, Steyerberg EW, et al. Prognosis Research Strategy (PROGRESS)  
42 769 2: prognostic factor research. *PLoS medicine* 2013;10(2):e1001380. doi:  
43 770 10.1371/journal.pmed.1001380 [published Online First: 2013/02/09]  
44  
45 771 72. Hingorani AD, Windt DA, Riley RD, et al. Prognosis research strategy (PROGRESS) 4:  
46 772 stratified medicine research. *BMJ (Clinical research ed)* 2013;346:e5793. doi:  
47 773 10.1136/bmj.e5793 [published Online First: 2013/02/07]  
48  
49 774 73. Osler M, Linneberg A, Glumer C, et al. The cohorts at the Research Centre for Prevention  
50 775 and Health, formerly 'The Glostrup Population Studies'. *International journal of*  
51 776 *epidemiology* 2011;40(3):602-10. doi: 10.1093/ije/dyq041 [published Online First:  
52 777 2010/03/27]  
53  
54 778 74. Tjonneland A, Olsen A, Boll K, et al. Study design, exposure variables, and  
55 779 socioeconomic determinants of participation in Diet, Cancer and Health: a  
56 780 population-based prospective cohort study of 57,053 men and women in Denmark.  
57 781 *ScandJPublic Health* 2007;35(4):432-41.



- 1  
2  
3 782 75. Armstrong AW, Harskamp CT, Dhillon JS, et al. Psoriasis and smoking: a systematic  
4 783 review and meta-analysis. *The British journal of dermatology* 2014;170(2):304-14.  
5 784 doi: 10.1111/bjd.12670 [published Online First: 2013/10/15]  
6  
7 785 76. Ibfelt EH, Jensen DV, Hetland ML. The Danish nationwide clinical register for patients  
8 786 with rheumatoid arthritis: DANBIO. *Clinical epidemiology* 2016;8:737-42. doi:  
9 787 10.2147/clep.s99490 [published Online First: 2016/11/09]  
10  
11 788 77. Gniadecki R, Kragballe K, Dam TN, et al. Comparison of drug survival rates for  
12 789 adalimumab, etanercept and infliximab in patients with psoriasis vulgaris. *The British*  
13 790 *journal of dermatology* 2011;164(5):1091-6. doi: 10.1111/j.1365-2133.2011.10213.x  
14 791 [published Online First: 2011/01/12]  
15  
16 792 78. Moore HM, Kelly AB, Jewell SD, et al. Biospecimen reporting for improved study  
17 793 quality (BRISQ). *JProteomeRes* 2011;10(8):3429-38.  
18  
19 794 79. Betsou F, Lehmann S, Ashton G, et al. Standard preanalytical coding for biospecimens:  
20 795 defining the sample PREanalytical code. *Cancer epidemiology, biomarkers &*  
21 796 *prevention : a publication of the American Association for Cancer Research,*  
22 797 *cosponsored by the American Society of Preventive Oncology* 2010;19(4):1004-11.  
23 798 doi: 10.1158/1055-9965.epi-09-1268 [published Online First: 2010/03/25]  
24  
25 799 80. Bek S, Nielsen JV, Bojesen AB, et al. Systematic review: genetic biomarkers associated  
26 800 with anti-TNF treatment response in inflammatory bowel diseases. *Alimentary*  
27 801 *pharmacology & therapeutics* 2016;44(6):554-67. doi: 10.1111/apt.13736  
28  
29 802 81. Armyra K, Kouris A, Markantoni V, et al. Hidradenitis suppurativa treated with  
30 803 tetracycline in combination with colchicine: a prospective series of 20 patients.  
31 804 *International journal of dermatology* 2017;56(3):346-50. doi: 10.1111/ijd.13428  
32 805 [published Online First: 2017/01/06]  
33  
34 806 82. Skoie IM, Dalen Is, Ternowitz T, et al. Fatigue in psoriasis - a controlled study. *The*  
35 807 *British journal of dermatology* 2017 doi: 10.1111/bjd.15375 [published Online First:  
36 808 2017/02/10]  
37  
38 809 83. Stjernman H, Granno C, Jarnerot G, et al. Short health scale: a valid, reliable, and  
39 810 responsive instrument for subjective health assessment in Crohn's disease.  
40 811 *Inflammatory bowel diseases* 2008;14(1):47-52. doi: 10.1002/ibd.20255 [published  
41 812 Online First: 2007/09/11]  
42  
43 813 84. Hjortswang H, Jarnerot G, Curman B, et al. The Short Health Scale: a valid measure of  
44 814 subjective health in ulcerative colitis. *Scandinavian journal of gastroenterology*  
45 815 2006;41(10):1196-203. doi: 10.1080/00365520600610618 [published Online First:  
46 816 2006/09/23]  
47  
48 817 85. Desai MS, Seekatz AM, Koropatkin NM, et al. A Dietary Fiber-Deprived Gut Microbiota  
49 818 Degrades the Colonic Mucus Barrier and Enhances Pathogen Susceptibility. *Cell*  
50 819 2016;167(5):1339-53.e21. doi: 10.1016/j.cell.2016.10.043 [published Online First:  
51 820 2016/11/20]  
52  
53 821 86. Png CW, Linden SK, Gilshenan KS, et al. Mucolytic bacteria with increased prevalence  
54 822 in IBD mucosa augment in vitro utilization of mucin by other bacteria. *The American*  
55 823 *journal of gastroenterology* 2010;105(11):2420-8. doi: 10.1038/ajg.2010.281  
56 824 [published Online First: 2010/07/22]  
57  
58  
59  
60

- 1  
2  
3 825 87. Gibson GR, Macfarlane GT, Cummings JH. Sulphate reducing bacteria and hydrogen  
4 826 metabolism in the human large intestine. *Gut* 1993;34(4):437-9. [published Online  
5 827 First: 1993/04/01]
- 7 828 88. Windey K, De P, V, Louat T, et al. Modulation of protein fermentation does not affect  
8 829 fecal water toxicity: a randomized cross-over study in healthy subjects. *PLoS ONE*  
9 830 2012;7(12):e52387.
- 11 831 89. Yao CK, Muir JG, Gibson PR. Review article: insights into colonic protein fermentation,  
12 832 its modulation and potential health implications. *Alimentary pharmacology &*  
13 833 *therapeutics* 2016;43(2):181-96. doi: 10.1111/apt.13456 [published Online First:  
14 834 2015/11/04]
- 16 835 90. Ijssennagger N, van der Meer R, van Mil SW. Sulfide as a Mucus Barrier-Breaker in  
17 836 Inflammatory Bowel Disease? *Trends Mol Med* 2016;22(3):190-9. doi:  
18 837 10.1016/j.molmed.2016.01.002 [published Online First: 2016/02/08]
- 20 838 91. Maloy KJ, Powrie F. Intestinal homeostasis and its breakdown in inflammatory bowel  
21 839 disease. *Nature* 2011;474(7351):298-306. doi: 10.1038/nature10208
- 23 840 92. Cui J, Chen Y, Wang HY, et al. Mechanisms and pathways of innate immune activation  
24 841 and regulation in health and cancer. *Human vaccines & immunotherapeutics*  
25 842 2014;10(11):3270-85. doi: 10.4161/21645515.2014.979640 [published Online First:  
26 843 2015/01/28]
- 28 844 93. Jia W, Whitehead RN, Griffiths L, et al. Diversity and distribution of sulphate-reducing  
29 845 bacteria in human faeces from healthy subjects and patients with inflammatory bowel  
30 846 disease. *FEMS Immunol Med Microbiol* 2012;65(1):55-68.
- 32 847 94. Sundstrom B, Johansson I, Rantapaa-Dahlqvist S. Diet and alcohol as risk factors for  
33 848 rheumatoid arthritis: a nested case-control study. *Rheumatology international*  
34 849 2015;35(3):533-9. doi: 10.1007/s00296-014-3185-x [published Online First:  
35 850 2014/11/28]
- 37 851 95. Jowett SL, Seal CJ, Pearce MS, et al. Influence of dietary factors on the clinical course of  
38 852 ulcerative colitis: a prospective cohort study. *Gut* 2004;53(10):1479-84. doi:  
39 853 10.1136/gut.2003.024828
- 41 854 96. Kelly KR, Haus JM, Solomon TP, et al. A low-glycemic index diet and exercise  
42 855 intervention reduces TNF(alpha) in isolated mononuclear cells of older, obese adults.  
43 856 *The Journal of nutrition* 2011;141(6):1089-94. doi: 10.3945/jn.111.139964  
44 857 [published Online First: 2011/04/29]
- 46 858 97. Merga Y, Campbell BJ, Rhodes JM. Mucosal barrier, bacteria and inflammatory bowel  
47 859 disease: possibilities for therapy. *Digestive diseases (Basel, Switzerland)*  
48 860 2014;32(4):475-83. doi: 10.1159/000358156 [published Online First: 2014/06/28]
- 50 861 98. Hedrick VE, Dietrich AM, Estabrooks PA, et al. Dietary biomarkers: advances,  
51 862 limitations and future directions. *Nutrition journal* 2012;11:109. doi:  
52 863 10.1186/1475-2891-11-109 [published Online First: 2012/12/15]
- 54 864 99. Corella D, Ordovas JM. Biomarkers: background, classification and guidelines for  
55 865 applications in nutritional epidemiology. *Nutricion hospitalaria* 2015;31 Suppl  
56 866 3:177-88. doi: 10.3305/nh.2015.31.sup3.8765 [published Online First: 2015/02/27]

- 1  
2  
3 867 100. Holen T, Norheim F, Gundersen TE, et al. Biomarkers for nutrient intake with focus on  
4 868 alternative sampling techniques. *Genes & nutrition* 2016;11:12. doi:  
5 869 10.1186/s12263-016-0527-1 [published Online First: 2016/08/24]  
6  
7 870 101. Zhang Y, Schottker B, Florath I, et al. Smoking-Associated DNA Methylation  
8 871 Biomarkers and Their Predictive Value for All-Cause and Cardiovascular Mortality.  
9 872 *Environmental health perspectives* 2016;124(1):67-74. doi: 10.1289/ehp.1409020  
10 873 [published Online First: 2015/05/29]  
11  
12 874 102. Garneau V, Rudkowska I, Paradis AM, et al. Omega-3 fatty acids status in human  
13 875 subjects estimated using a food frequency questionnaire and plasma phospholipids  
14 876 levels. *Nutrition journal* 2012;11:46. doi: 10.1186/1475-2891-11-46 [published  
15 877 Online First: 2012/07/11]  
16  
17 878 103. Warensjo Lemming E, Nalsen C, Becker W, et al. Relative validation of the dietary  
18 879 intake of fatty acids among adults in the Swedish National Dietary Survey using  
19 880 plasma phospholipid fatty acid composition. *Journal of nutritional science*  
20 881 2015;4:e25. doi: 10.1017/jns.2015.1 [published Online First: 2015/10/27]  
21 882  
22 882 104. Wallingford SC, Pilkington SM, Massey KA, et al. Three-way assessment of long-chain  
23 883 n-3 PUFA nutrition: by questionnaire and matched blood and skin samples. *The*  
24 884 *British journal of nutrition* 2013;109(4):701-8. doi: 10.1017/s0007114512001997  
25 885 [published Online First: 2012/05/24]  
26  
27 886 105. Dragsted LO. Biomarkers of meat intake and the application of nutrigenomics. *Meat*  
28 887 *science* 2010;84(2):301-7. doi: 10.1016/j.meatsci.2009.08.028 [published Online  
29 888 First: 2010/04/09]  
30  
31 889 106. Riserus U, Marklund M. Milk fat biomarkers and cardiometabolic disease. *Current*  
32 890 *opinion in lipidology* 2017;28(1):46-51. doi: 10.1097/mol.0000000000000381  
33 891 [published Online First: 2016/12/03]  
34  
35 892 107. Johnsen NF, Hausner H, Olsen A, et al. Intake of whole grains and vegetables  
36 893 determines the plasma enterolactone concentration of Danish women. *JNutr*  
37 894 2004;134(10):2691-97.  
38  
39 895 108. Norskov NP, Kyro C, Olsen A, et al. High-Throughput LC-MS/MS Method for Direct  
40 896 Quantification of Glucuronidated, Sulfated, and Free Enterolactone in Human  
41 897 Plasma. *Journal of proteome research* 2016;15(3):1051-8. doi:  
42 898 10.1021/acs.jproteome.5b01117 [published Online First: 2016/01/27]  
43  
44 899 109. Moreno ML, Cebolla A, Munoz-Suano A, et al. Detection of gluten immunogenic  
45 900 peptides in the urine of patients with coeliac disease reveals transgressions in the  
46 901 gluten-free diet and incomplete mucosal healing. *Gut* 2017;66(2):250-57. doi:  
47 902 10.1136/gutjnl-2015-310148 [published Online First: 2015/11/27]  
48  
49 903 110. Zamora-Ros R, Touillaud M, Rothwell JA, et al. Measuring exposure to the polyphenol  
50 904 metabolome in observational epidemiologic studies: current tools and applications  
51 905 and their limits. *The American journal of clinical nutrition* 2014;100(1):11-26. doi:  
52 906 10.3945/ajcn.113.077743 [published Online First: 2014/05/03]  
53  
54 907 111. Krogholm KS, Bredsdorff L, Alinia S, et al. Free fruit at workplace intervention  
55 908 increases total fruit intake: a validation study using 24 h dietary recall and urinary  
56  
57  
58  
59  
60

- 1  
2  
3 909 flavonoid excretion. *European journal of clinical nutrition* 2010;64(10):1222-8. doi:  
4 910 10.1038/ejcn.2010.130 [published Online First: 2010/08/05]  
5  
6 911 112. Linseisen J, Rohrmann S. Biomarkers of dietary intake of flavonoids and phenolic acids  
7 912 for studying diet-cancer relationship in humans. *European journal of nutrition*  
8 913 2008;47 Suppl 2:60-8. doi: 10.1007/s00394-008-2007-x [published Online First:  
9 914 2008/06/17]  
10  
11 915 113. Brantsaeter AL, Haugen M, Rasmussen SE, et al. Urine flavonoids and plasma  
12 916 carotenoids in the validation of fruit, vegetable and tea intake during pregnancy in the  
13 917 Norwegian Mother and Child Cohort Study (MoBa). *Public health nutrition*  
14 918 2007;10(8):838-47. doi: 10.1017/s1368980007339037 [published Online First:  
15 919 2007/05/12]  
16  
17 920 114. Neale EP, Batterham MJ, Tapsell LC. Consumption of a healthy dietary pattern results  
18 921 in significant reductions in C-reactive protein levels in adults: a meta-analysis.  
19 922 *Nutrition research (New York, NY)* 2016;36(5):391-401. doi:  
20 923 10.1016/j.nutres.2016.02.009 [published Online First: 2016/04/23]  
21  
22 924 115. Stedile N, Canuto R, Col CD, et al. Dietary total antioxidant capacity is associated with  
23 925 plasmatic antioxidant capacity, nutrient intake and lipid and DNA damage in healthy  
24 926 women. *International journal of food sciences and nutrition* 2016;67(4):479-88. doi:  
25 927 10.3109/09637486.2016.1164670 [published Online First: 2016/03/29]  
26  
27 928 116. Shah RV, Murthy VL, Allison MA, et al. Diet and adipose tissue distributions: The  
28 929 Multi-Ethnic Study of Atherosclerosis. *Nutrition, metabolism, and cardiovascular*  
29 930 *diseases : NMCD* 2016;26(3):185-93. doi: 10.1016/j.numecd.2015.12.012 [published  
30 931 Online First: 2016/02/24]  
31  
32 932 117. Sotos-Prieto M, Bhupathiraju SN, Falcon LM, et al. Association between a Healthy  
33 933 Lifestyle Score and inflammatory markers among Puerto Rican adults. *Nutrition,*  
34 934 *metabolism, and cardiovascular diseases : NMCD* 2016;26(3):178-84. doi:  
35 935 10.1016/j.numecd.2015.12.004 [published Online First: 2016/02/04]  
36  
37 936 118. Ko BJ, Park KH, Shin S, et al. Diet quality and diet patterns in relation to circulating  
38 937 cardiometabolic biomarkers. *Clinical nutrition (Edinburgh, Scotland)*  
39 938 2016;35(2):484-90. doi: 10.1016/j.clnu.2015.03.022 [published Online First:  
40 939 2015/04/29]  
41  
42 940 119. Marques-Rocha JL, Milagro FI, Mansego ML, et al. LINE-1 methylation is positively  
43 941 associated with healthier lifestyle but inversely related to body fat mass in healthy  
44 942 young individuals. *Epigenetics* 2016;11(1):49-60. doi:  
45 943 10.1080/15592294.2015.1135286 [published Online First: 2016/01/21]  
46  
47 944 120. Umoh FI, Kato I, Ren J, et al. Markers of systemic exposures to products of intestinal  
48 945 bacteria in a dietary intervention study. *European journal of nutrition*  
49 946 2016;55(2):793-8. doi: 10.1007/s00394-015-0900-7 [published Online First:  
50 947 2015/04/24]  
51  
52 948 121. Loprinzi PD, Lee IM, Andersen RE, et al. Association of Concurrent Healthy Eating and  
53 949 Regular Physical Activity With Cardiovascular Disease Risk Factors in U.S. Youth.  
54 950 *American journal of health promotion : AJHP* 2015;30(1):2-8. doi:  
55 951 10.4278/ajhp.140213-QUAN-71 [published Online First: 2014/11/06]  
56  
57  
58  
59  
60

- 1  
2  
3 952 122. Yu E, Rimm E, Qi L, et al. Diet, Lifestyle, Biomarkers, Genetic Factors, and Risk of  
4 953 Cardiovascular Disease in the Nurses' Health Studies. *American journal of public*  
5 954 *health* 2016;106(9):1616-23. doi: 10.2105/ajph.2016.303316 [published Online  
6 955 First: 2016/07/28]  
7  
8 956 123. Satija A, Bhupathiraju SN, Rimm EB, et al. Plant-Based Dietary Patterns and Incidence  
9 957 of Type 2 Diabetes in US Men and Women: Results from Three Prospective Cohort  
10 958 Studies. *PLoS medicine* 2016;13(6):e1002039. doi: 10.1371/journal.pmed.1002039  
11 959 [published Online First: 2016/06/15]  
12  
13 960 124. Ardisson Korat AV, Willett WC, Hu FB. Diet, lifestyle, and genetic risk factors for type  
14 961 2 diabetes: a review from the Nurses' Health Study, Nurses' Health Study 2, and  
15 962 Health Professionals' Follow-up Study. *Current nutrition reports* 2014;3(4):345-54.  
16 963 doi: 10.1007/s13668-014-0103-5 [published Online First: 2015/01/20]  
17  
18 964 125. Nettleton JA, Steffen LM, Palmas W, et al. Associations between microalbuminuria and  
19 965 animal foods, plant foods, and dietary patterns in the Multiethnic Study of  
20 966 Atherosclerosis. *The American journal of clinical nutrition* 2008;87(6):1825-36.  
21 967 [published Online First: 2008/06/11]  
22  
23  
24  
25  
26  
27  
28  
29  
30  
31  
32  
33  
34  
35  
36  
37  
38  
39  
40  
41  
42  
43  
44  
45  
46  
47  
48  
49  
50  
51  
52  
53  
54  
55  
56  
57  
58  
59  
60



1  
2  
3  
4  
5  
6  
7  
8  
9  
10  
11  
12  
13  
14  
15  
16  
17  
18  
19  
20  
21  
22  
23  
24  
25  
26  
27  
28  
29  
30  
31  
32  
33  
34  
35  
36  
37  
38  
39  
40  
41  
42  
43  
44  
45  
46  
47  
48  
49  
50  
51  
52  
53  
54  
55  
56  
57  
58  
59  
60

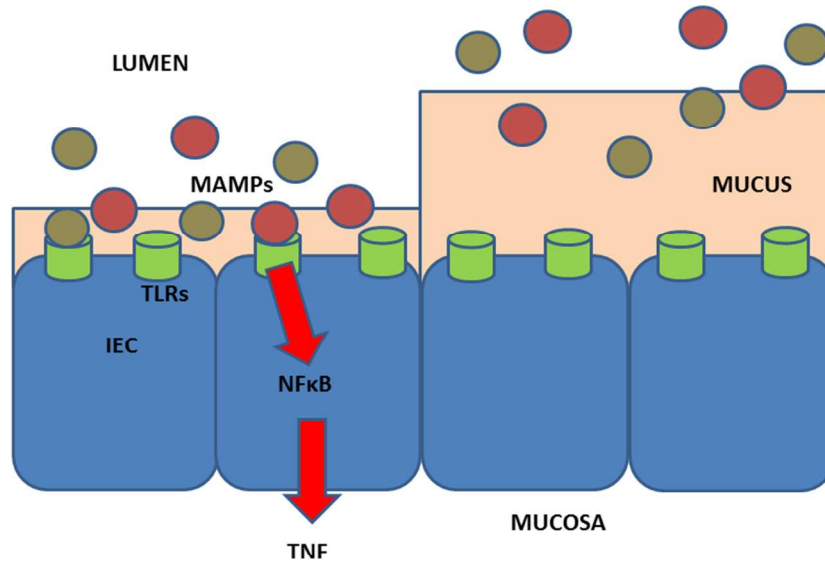

Figure 1. Hypothesis for effects of diet in relation to treatment effect

81x60mm (300 x 300 DPI)

ew only

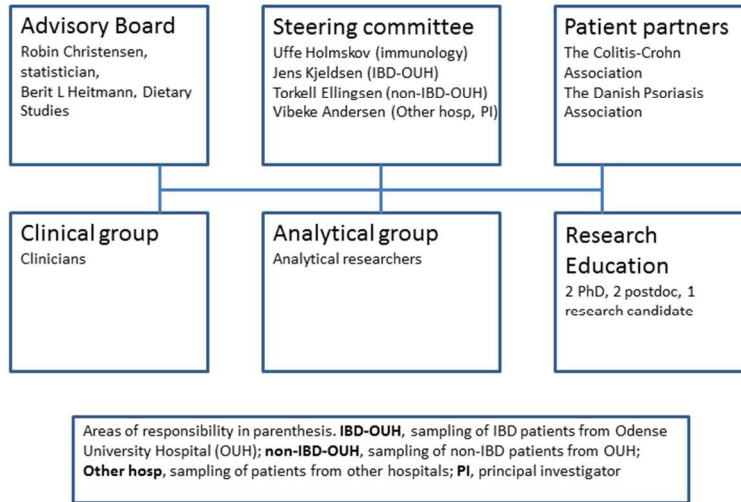

Figure 2. Organisation and patient research partners

81x60mm (300 x 300 DPI)

ew only

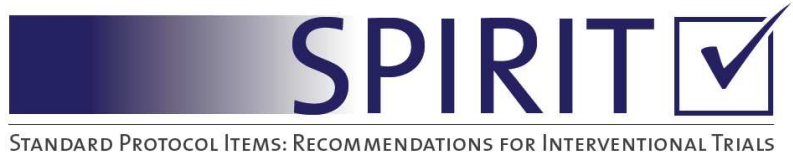

1  
2  
3  
4  
5  
6  
7  
8  
9  
10  
11  
12  
13  
14  
15  
16  
17  
18  
19  
20  
21  
22  
23  
24  
25  
26  
27  
28  
29  
30  
31  
32  
33  
34  
35  
36  
37  
38  
39  
40  
41  
42  
43  
44  
45  
46  
47  
48  
49

SPIRIT 2013 Checklist: Recommended items to address in a clinical trial protocol and related documents\*

| Section/item                      | Item No | Description                                                                                                                                                                                                                                                                              | Addressed on page number |
|-----------------------------------|---------|------------------------------------------------------------------------------------------------------------------------------------------------------------------------------------------------------------------------------------------------------------------------------------------|--------------------------|
| <b>Administrative information</b> |         |                                                                                                                                                                                                                                                                                          |                          |
| Title                             | 1       | Descriptive title identifying the study design, population, interventions, and, if applicable, trial acronym                                                                                                                                                                             | ___1___                  |
| Trial registration                | 2a      | Trial identifier and registry name. If not yet registered, name of intended registry                                                                                                                                                                                                     | ___1___                  |
|                                   | 2b      | All items from the World Health Organization Trial Registration Data Set                                                                                                                                                                                                                 | _____                    |
| Protocol version                  | 3       | Date and version identifier                                                                                                                                                                                                                                                              | __suppl___               |
| Funding                           | 4       | Sources and types of financial, material, and other support                                                                                                                                                                                                                              | __14___                  |
| Roles and responsibilities        | 5a      | Names, affiliations, and roles of protocol contributors                                                                                                                                                                                                                                  | 2 and 14___              |
|                                   | 5b      | Name and contact information for the trial sponsor                                                                                                                                                                                                                                       | __2___                   |
|                                   | 5c      | Role of study sponsor and funders, if any, in study design; collection, management, analysis, and interpretation of data; writing of the report; and the decision to submit the report for publication, including whether they will have ultimate authority over any of these activities | __7-14___                |
|                                   | 5d      | Composition, roles, and responsibilities of the coordinating centre, steering committee, endpoint adjudication committee, data management team, and other individuals or groups overseeing the trial, if applicable (see Item 21a for data monitoring committee)                         | __7, 11- 14              |



1  
2  
3 **Introduction**  
4

|                            |    |                                                                                                                                                                                                           |              |
|----------------------------|----|-----------------------------------------------------------------------------------------------------------------------------------------------------------------------------------------------------------|--------------|
| 5 Background and rationale | 6a | Description of research question and justification for undertaking the trial, including summary of relevant studies (published and unpublished) examining benefits and harms for each intervention        | __Figure 1__ |
|                            | 6b | Explanation for choice of comparators                                                                                                                                                                     | __8__        |
| 10 Objectives              | 7  | Specific objectives or hypotheses                                                                                                                                                                         | __6__        |
| 12 Trial design            | 8  | Description of trial design including type of trial (eg, parallel group, crossover, factorial, single group), allocation ratio, and framework (eg, superiority, equivalence, noninferiority, exploratory) | __7__        |

15  
16 **Methods: Participants, interventions, and outcomes**  
17

|                         |     |                                                                                                                                                                                                                                                                                                                                                                                |          |
|-------------------------|-----|--------------------------------------------------------------------------------------------------------------------------------------------------------------------------------------------------------------------------------------------------------------------------------------------------------------------------------------------------------------------------------|----------|
| 18 Study setting        | 9   | Description of study settings (eg, community clinic, academic hospital) and list of countries where data will be collected. Reference to where list of study sites can be obtained                                                                                                                                                                                             | __7__    |
| 21 Eligibility criteria | 10  | Inclusion and exclusion criteria for participants. If applicable, eligibility criteria for study centres and individuals who will perform the interventions (eg, surgeons, psychotherapists)                                                                                                                                                                                   | __7__    |
| 24 Interventions        | 11a | Interventions for each group with sufficient detail to allow replication, including how and when they will be administered                                                                                                                                                                                                                                                     | __7__    |
|                         | 11b | Criteria for discontinuing or modifying allocated interventions for a given trial participant (eg, drug dose change in response to harms, participant request, or improving/worsening disease)                                                                                                                                                                                 | __NA__   |
|                         | 11c | Strategies to improve adherence to intervention protocols, and any procedures for monitoring adherence (eg, drug tablet return, laboratory tests)                                                                                                                                                                                                                              | __NA__   |
|                         | 11d | Relevant concomitant care and interventions that are permitted or prohibited during the trial                                                                                                                                                                                                                                                                                  | __NA__   |
| 35 Outcomes             | 12  | Primary, secondary, and other outcomes, including the specific measurement variable (eg, systolic blood pressure), analysis metric (eg, change from baseline, final value, time to event), method of aggregation (eg, median, proportion), and time point for each outcome. Explanation of the clinical relevance of chosen efficacy and harm outcomes is strongly recommended | __8-10__ |
| 41 Participant timeline | 13  | Time schedule of enrolment, interventions (including any run-ins and washouts), assessments, and visits for participants. A schematic diagram is highly recommended (see Figure)                                                                                                                                                                                               | __7__    |

1  
2  
3  
4  
5  
6  
7  
8  
9  
10  
11  
12  
13  
14  
15  
16  
17  
18  
19  
20  
21  
22  
23  
24  
25  
26  
27  
28  
29  
30  
31  
32  
33  
34  
35  
36  
37  
38  
39  
40  
41  
42  
43  
44  
45  
46  
47  
48  
49

|             |    |                                                                                                                                                                                       |        |
|-------------|----|---------------------------------------------------------------------------------------------------------------------------------------------------------------------------------------|--------|
| Sample size | 14 | Estimated number of participants needed to achieve study objectives and how it was determined, including clinical and statistical assumptions supporting any sample size calculations | __12__ |
| Recruitment | 15 | Strategies for achieving adequate participant enrolment to reach target sample size                                                                                                   | __7__  |

**Methods: Assignment of interventions (for controlled trials)**

Allocation:

|                                  |     |                                                                                                                                                                                                                                                                                                                                                          |        |
|----------------------------------|-----|----------------------------------------------------------------------------------------------------------------------------------------------------------------------------------------------------------------------------------------------------------------------------------------------------------------------------------------------------------|--------|
| Sequence generation              | 16a | Method of generating the allocation sequence (eg, computer-generated random numbers), and list of any factors for stratification. To reduce predictability of a random sequence, details of any planned restriction (eg, blocking) should be provided in a separate document that is unavailable to those who enrol participants or assign interventions | __NA__ |
| Allocation concealment mechanism | 16b | Mechanism of implementing the allocation sequence (eg, central telephone; sequentially numbered, opaque, sealed envelopes), describing any steps to conceal the sequence until interventions are assigned                                                                                                                                                | __NA__ |
| Implementation                   | 16c | Who will generate the allocation sequence, who will enrol participants, and who will assign participants to interventions                                                                                                                                                                                                                                | __NA__ |
| Blinding (masking)               | 17a | Who will be blinded after assignment to interventions (eg, trial participants, care providers, outcome assessors, data analysts), and how                                                                                                                                                                                                                | __7__  |
|                                  | 17b | If blinded, circumstances under which unblinding is permissible, and procedure for revealing a participant's allocated intervention during the trial                                                                                                                                                                                                     | __NA__ |

**Methods: Data collection, management, and analysis**

|                         |     |                                                                                                                                                                                                                                                                                                                                                                                                              |        |
|-------------------------|-----|--------------------------------------------------------------------------------------------------------------------------------------------------------------------------------------------------------------------------------------------------------------------------------------------------------------------------------------------------------------------------------------------------------------|--------|
| Data collection methods | 18a | Plans for assessment and collection of outcome, baseline, and other trial data, including any related processes to promote data quality (eg, duplicate measurements, training of assessors) and a description of study instruments (eg, questionnaires, laboratory tests) along with their reliability and validity, if known. Reference to where data collection forms can be found, if not in the protocol | __19__ |
|                         | 18b | Plans to promote participant retention and complete follow-up, including list of any outcome data to be collected for participants who discontinue or deviate from intervention protocols                                                                                                                                                                                                                    | __19__ |

|    |                                 |     |                                                                                                                                                                                                                                                                                                                                       |          |
|----|---------------------------------|-----|---------------------------------------------------------------------------------------------------------------------------------------------------------------------------------------------------------------------------------------------------------------------------------------------------------------------------------------|----------|
| 1  |                                 |     |                                                                                                                                                                                                                                                                                                                                       |          |
| 2  |                                 |     |                                                                                                                                                                                                                                                                                                                                       |          |
| 3  | Data management                 | 19  | Plans for data entry, coding, security, and storage, including any related processes to promote data quality (eg, double data entry; range checks for data values). Reference to where details of data management procedures can be found, if not in the protocol                                                                     | ___19___ |
| 4  |                                 |     |                                                                                                                                                                                                                                                                                                                                       |          |
| 5  |                                 |     |                                                                                                                                                                                                                                                                                                                                       |          |
| 6  |                                 |     |                                                                                                                                                                                                                                                                                                                                       |          |
| 7  | Statistical methods             | 20a | Statistical methods for analysing primary and secondary outcomes. Reference to where other details of the statistical analysis plan can be found, if not in the protocol                                                                                                                                                              | ___12___ |
| 8  |                                 |     |                                                                                                                                                                                                                                                                                                                                       |          |
| 9  |                                 |     |                                                                                                                                                                                                                                                                                                                                       |          |
| 10 |                                 | 20b | Methods for any additional analyses (eg, subgroup and adjusted analyses)                                                                                                                                                                                                                                                              | ___12___ |
| 11 |                                 |     |                                                                                                                                                                                                                                                                                                                                       |          |
| 12 |                                 | 20c | Definition of analysis population relating to protocol non-adherence (eg, as randomised analysis), and any statistical methods to handle missing data (eg, multiple imputation)                                                                                                                                                       | ___12___ |
| 13 |                                 |     |                                                                                                                                                                                                                                                                                                                                       |          |
| 14 |                                 |     |                                                                                                                                                                                                                                                                                                                                       |          |
| 15 |                                 |     |                                                                                                                                                                                                                                                                                                                                       |          |
| 16 | <b>Methods: Monitoring</b>      |     |                                                                                                                                                                                                                                                                                                                                       |          |
| 17 |                                 |     |                                                                                                                                                                                                                                                                                                                                       |          |
| 18 | Data monitoring                 | 21a | Composition of data monitoring committee (DMC); summary of its role and reporting structure; statement of whether it is independent from the sponsor and competing interests; and reference to where further details about its charter can be found, if not in the protocol. Alternatively, an explanation of why a DMC is not needed | ___NA___ |
| 19 |                                 |     |                                                                                                                                                                                                                                                                                                                                       |          |
| 20 |                                 |     |                                                                                                                                                                                                                                                                                                                                       |          |
| 21 |                                 |     |                                                                                                                                                                                                                                                                                                                                       |          |
| 22 |                                 |     |                                                                                                                                                                                                                                                                                                                                       |          |
| 23 |                                 | 21b | Description of any interim analyses and stopping guidelines, including who will have access to these interim results and make the final decision to terminate the trial                                                                                                                                                               | ___NA___ |
| 24 |                                 |     |                                                                                                                                                                                                                                                                                                                                       |          |
| 25 |                                 |     |                                                                                                                                                                                                                                                                                                                                       |          |
| 26 | Harms                           | 22  | Plans for collecting, assessing, reporting, and managing solicited and spontaneously reported adverse events and other unintended effects of trial interventions or trial conduct                                                                                                                                                     | ___19___ |
| 27 |                                 |     |                                                                                                                                                                                                                                                                                                                                       |          |
| 28 |                                 |     |                                                                                                                                                                                                                                                                                                                                       |          |
| 29 | Auditing                        | 23  | Frequency and procedures for auditing trial conduct, if any, and whether the process will be independent from investigators and the sponsor                                                                                                                                                                                           | ___NA___ |
| 30 |                                 |     |                                                                                                                                                                                                                                                                                                                                       |          |
| 31 |                                 |     |                                                                                                                                                                                                                                                                                                                                       |          |
| 32 |                                 |     |                                                                                                                                                                                                                                                                                                                                       |          |
| 33 | <b>Ethics and dissemination</b> |     |                                                                                                                                                                                                                                                                                                                                       |          |
| 34 |                                 |     |                                                                                                                                                                                                                                                                                                                                       |          |
| 35 | Research ethics approval        | 24  | Plans for seeking research ethics committee/institutional review board (REC/IRB) approval                                                                                                                                                                                                                                             | ___14___ |
| 36 |                                 |     |                                                                                                                                                                                                                                                                                                                                       |          |
| 37 |                                 |     |                                                                                                                                                                                                                                                                                                                                       |          |
| 38 | Protocol amendments             | 25  | Plans for communicating important protocol modifications (eg, changes to eligibility criteria, outcomes, analyses) to relevant parties (eg, investigators, REC/IRBs, trial participants, trial registries, journals, regulators)                                                                                                      | ___13___ |
| 39 |                                 |     |                                                                                                                                                                                                                                                                                                                                       |          |
| 40 |                                 |     |                                                                                                                                                                                                                                                                                                                                       |          |
| 41 |                                 |     |                                                                                                                                                                                                                                                                                                                                       |          |
| 42 |                                 |     |                                                                                                                                                                                                                                                                                                                                       |          |
| 43 |                                 |     |                                                                                                                                                                                                                                                                                                                                       |          |
| 44 |                                 |     |                                                                                                                                                                                                                                                                                                                                       |          |
| 45 |                                 |     |                                                                                                                                                                                                                                                                                                                                       |          |
| 46 |                                 |     |                                                                                                                                                                                                                                                                                                                                       |          |
| 47 |                                 |     |                                                                                                                                                                                                                                                                                                                                       |          |
| 48 |                                 |     |                                                                                                                                                                                                                                                                                                                                       |          |
| 49 |                                 |     |                                                                                                                                                                                                                                                                                                                                       |          |

|    |                               |     |                                                                                                                                                                                                                                                                                     |           |
|----|-------------------------------|-----|-------------------------------------------------------------------------------------------------------------------------------------------------------------------------------------------------------------------------------------------------------------------------------------|-----------|
| 1  |                               |     |                                                                                                                                                                                                                                                                                     |           |
| 2  |                               |     |                                                                                                                                                                                                                                                                                     |           |
| 3  | Consent or assent             | 26a | Who will obtain informed consent or assent from potential trial participants or authorised surrogates, and how (see Item 32)                                                                                                                                                        | ___7___   |
| 4  |                               |     |                                                                                                                                                                                                                                                                                     |           |
| 5  |                               |     |                                                                                                                                                                                                                                                                                     |           |
| 6  |                               | 26b | Additional consent provisions for collection and use of participant data and biological specimens in ancillary studies, if applicable                                                                                                                                               | ___NA___  |
| 7  |                               |     |                                                                                                                                                                                                                                                                                     |           |
| 8  |                               |     |                                                                                                                                                                                                                                                                                     |           |
| 9  | Confidentiality               | 27  | How personal information about potential and enrolled participants will be collected, shared, and maintained in order to protect confidentiality before, during, and after the trial                                                                                                | ___8___   |
| 10 |                               |     |                                                                                                                                                                                                                                                                                     |           |
| 11 |                               |     |                                                                                                                                                                                                                                                                                     |           |
| 12 | Declaration of interests      | 28  | Financial and other competing interests for principal investigators for the overall trial and each study site                                                                                                                                                                       | ___14___  |
| 13 |                               |     |                                                                                                                                                                                                                                                                                     |           |
| 14 |                               |     |                                                                                                                                                                                                                                                                                     |           |
| 15 | Access to data                | 29  | Statement of who will have access to the final trial dataset, and disclosure of contractual agreements that limit such access for investigators                                                                                                                                     | ___NA___  |
| 16 |                               |     |                                                                                                                                                                                                                                                                                     |           |
| 17 |                               |     |                                                                                                                                                                                                                                                                                     |           |
| 18 | Ancillary and post-trial care | 30  | Provisions, if any, for ancillary and post-trial care, and for compensation to those who suffer harm from trial participation                                                                                                                                                       | ___NA___  |
| 19 |                               |     |                                                                                                                                                                                                                                                                                     |           |
| 20 |                               |     |                                                                                                                                                                                                                                                                                     |           |
| 21 | Dissemination policy          | 31a | Plans for investigators and sponsor to communicate trial results to participants, healthcare professionals, the public, and other relevant groups (eg, via publication, reporting in results databases, or other data sharing arrangements), including any publication restrictions | ___13___  |
| 22 |                               |     |                                                                                                                                                                                                                                                                                     |           |
| 23 |                               |     |                                                                                                                                                                                                                                                                                     |           |
| 24 |                               |     |                                                                                                                                                                                                                                                                                     |           |
| 25 |                               |     |                                                                                                                                                                                                                                                                                     |           |
| 26 |                               | 31b | Authorship eligibility guidelines and any intended use of professional writers                                                                                                                                                                                                      | ___NA___  |
| 27 |                               |     |                                                                                                                                                                                                                                                                                     |           |
| 28 |                               | 31c | Plans, if any, for granting public access to the full protocol, participant-level dataset, and statistical code                                                                                                                                                                     | ___NA___  |
| 29 |                               |     |                                                                                                                                                                                                                                                                                     |           |
| 30 | <b>Appendices</b>             |     |                                                                                                                                                                                                                                                                                     |           |
| 31 |                               |     |                                                                                                                                                                                                                                                                                     |           |
| 32 | Informed consent materials    | 32  | Model consent form and other related documentation given to participants and authorised surrogates                                                                                                                                                                                  | __suppl__ |
| 33 |                               |     |                                                                                                                                                                                                                                                                                     |           |
| 34 |                               |     |                                                                                                                                                                                                                                                                                     |           |
| 35 | Biological specimens          | 33  | Plans for collection, laboratory evaluation, and storage of biological specimens for genetic or molecular analysis in the current trial and for future use in ancillary studies, if applicable                                                                                      | ___19___  |
| 36 |                               |     |                                                                                                                                                                                                                                                                                     |           |
| 37 |                               |     |                                                                                                                                                                                                                                                                                     |           |

38 \*It is strongly recommended that this checklist be read in conjunction with the SPIRIT 2013 Explanation & Elaboration for important clarification on the items.  
 39 Amendments to the protocol should be tracked and dated. The SPIRIT checklist is copyrighted by the SPIRIT Group under the Creative Commons  
 40 "[Attribution-NonCommercial-NoDerivs 3.0 Unported](https://creativecommons.org/licenses/by-nc-nd/3.0/)" license.  
 41
